# Supplementary material
Source: PubMed Central journal article supplement (PMC2996423)
Supplement: 1003350107_Appendix.pdf [file 1003350107_Appendix.pdf]

# Organocatalytic asymmetric assembly reactions for syntheses of carbohydrate derivatives by intermolecular Michael-Henry reactions

*Hisatoshi Uehara, Ritsuo Imashiro, Gloria Hernández-Torres, and Carlos F. Barbas III\**

## Supporting Information

### Table of Contents

|                                                                    |         |
|--------------------------------------------------------------------|---------|
| 1. General Experimental .....                                      | S2      |
| 2. Experimental Procedures .....                                   | S2-S16  |
| 3. Determination of the absolute and relative configurations ..... | S17-S18 |
| 4. Reference.....                                                  | S19     |
| 5. HPLC traces.....                                                | S20-S38 |
| 6. NMR charts.....                                                 | S39-S64 |
| 7. X-ray crystallographic data of <b>12b</b> .....                 | S65-S74 |

## 1. General Experimental

$^1\text{H}$  NMR and  $^{13}\text{C}$  NMR spectra were recorded on Bruker DRX-600 (600 MHz), Bruker DRX-500 (500 MHz), Bruker AMX-400 (400 MHz), Varian Inova-300 or 400 (300 or 400 MHz) spectrometers in  $\text{CDCl}_3$ . Spectra were referenced to tetramethylsilane ( $\delta$  0.00 ppm,  $^1\text{H}$ ) or residual chloroform ( $\delta$  7.26 ppm,  $^1\text{H}$ ;  $\delta$  77.23 ppm,  $^{13}\text{C}$ ). Chemical shifts were reported in parts per million (ppm) on the  $\delta$  scale from an internal standard (NMR descriptions: s, singlet; d, doublet; t, triplet; q, quartet; m, multiplet; br, broad). Coupling constants,  $J$ , are reported in Hertz.

Mass spectroscopy was performed by the Scripps Research Institute Mass Spectrometer Center. Analytical thin-layer chromatography and flash column chromatography were performed on Merck Kieselgel 60 F254 silica gel plates and Silica Gel ZEOprep 60 ECO 40-63 Micron, respectively. Visualization was accomplished with  $\text{I}_2$  or anisaldehyde.

High performance liquid chromatography (HPLC) was performed on Hitachi L-7400 UV detector ( $\lambda = 220$  nm) and Hitachi L-2490 RI detector using Daicel Chiralpak IC and AD-H columns. Retention times ( $t_{\text{R}}$ ) and peak areas for HPLC were obtained from reporting integrators.

Unless otherwise noted, all the materials were obtained from commercial suppliers, and were used without further purification. All solvents were commercially available grade.

Catalysts **3** (ref. S1) and **8** (ref. S2) were prepared according to published procedures.

## 2. Experimental procedure

### General procedure for 3,4-dideoxy-D-talose derivatives **6** (Table 2).

(*tert*-Butyldimethylsilyloxy)acetaldehyde **1** (152  $\mu\text{L}$ , 0.8 mmol) was added to the solution of thiourea catalyst **3** (15.4 mg, 40  $\mu\text{mol}$ ) and nitroolefin **2** (0.2 mmol) in  $\text{CH}_2\text{Cl}_2$  (0.2 mL). The resulting solution was stirred at 30  $^\circ\text{C}$  for  $T_1$ , and then triethylamine (13.9  $\mu\text{L}$ , 0.1 mmol) was added. After  $T_2$  at 30  $^\circ\text{C}$ ,  $\text{Et}_2\text{O}$  and 1N HCl (0.2 mL) was added to the solution at rt. The aqueous layer was separated and extracted three times with  $\text{Et}_2\text{O}$ . The combined organic layers were dried over  $\text{MgSO}_4$ , concentrated, and purified by flash column chromatography to afford 3,4-dideoxy-D-talose derivative **6**.

### 2,6-Bis-*O*-(*tert*-butyldimethylsilyl)-3,4-dideoxy-4-nitro-3-phenyl- $\alpha$ -D-talopyranose (**6a**)

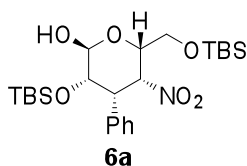

Colorless oil, yield 68%; Equilibrium mixture of **6a** and **5a** (3:1) in CDCl<sub>3</sub>; <sup>1</sup>H NMR (500 MHz, CDCl<sub>3</sub>) major (**6a**): δ 7.40 – 7.24 (m, 5H), 5.29 (brs, 1H), 4.79 (dd, *J* = 4.6, 2.5 Hz, 1H), 4.47 (ddd, *J* = 8.5, 6.2, 2.3 Hz, 1H), 3.90 (dd, *J* = 2.8, 1.4 Hz, 1H), 3.88 (dd, *J* = 9.9, 6.2 Hz, 1H), 3.84 (dd, *J* = 9.9, 8.6 Hz, 1H), 3.55 (dd, *J* = 4.7, 2.7 Hz, 1H), 3.03 (brs, 1H), 0.93 (s, 9H), 0.84 (s, 9H), 0.03 (s, 3H), 0.01 (s, 6H), -0.22 (s, 3H); minor (**5a**): δ 9.48 (brd, *J* = 1.1 Hz, 1H), 7.40 – 7.24 (m, 5H), 5.30 – 5.26 (m, 1H), 4.16 – 4.12 (m, 2H), 3.57 (dd, *J* = 9.3, 4.7 Hz, 1H), 3.55 – 3.51 (m, 1H), 3.46 (dd, *J* = 9.2, 6.0 Hz, 1H), 2.65 (brs, 1H), 0.96 (s, 9H), 0.86 (s, 9H), 0.02 (s, 3H), 0.01 (s, 3H), 0.00 (s, 3H), -0.02 (s, 3H); <sup>13</sup>C NMR (100 MHz, CDCl<sub>3</sub>) major (**6a**): δ 137.19, 129.95, 128.38, 128.11, 95.08, 81.65, 69.98, 68.85, 62.44, 43.47, 26.00, 25.95, 18.41, 18.29, -4.43, -4.98, -5.46, -5.55; minor (**5a**): δ 202.86, 137.47, 129.33, 128.85, 128.46, 87.27, 80.13, 69.44, 63.51, 49.33, 25.93, 25.91, 18.33, 18.29, -4.26, -4.85, -5.51, -5.55; HRMS (*m/z*): [M+H]<sup>+</sup> calcd for C<sub>24</sub>H<sub>44</sub>NO<sub>6</sub>Si<sub>2</sub><sup>+</sup> 498.2702, found 498.2700; Enantiomeric excess: 98%, determined by HPLC after reduction to corresponding alcohol (Chiralpak IC, hexane/*i*-PrOH = 97:3, flow rate 1.00 mL/min, λ = 220 nm, rt): t<sub>R</sub> (major) = 13.6 min, t<sub>R</sub> (minor) = 15.2 min.

**2,6-Bis-*O*-(*tert*-butyldimethylsilyl)-3-(4-bromophenyl)-3,4-dideoxy-4-nitro- $\alpha$ -D-talopyranose (**6b**)**

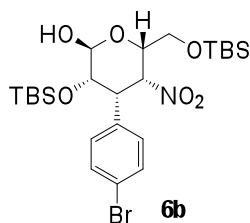

Colorless oil, yield 62%; Equilibrium mixture of **6b** and **5b** (4:1) in CDCl<sub>3</sub>; <sup>1</sup>H NMR (**6b**, 400 MHz, CDCl<sub>3</sub>) δ 7.46 – 7.42 (m, 2H), 7.27 – 7.23 (m, 2H), 5.28 (brs, 1H), 4.73 (dd, *J* = 4.5, 2.5 Hz, 1H), 4.48 – 4.41 (m, 1H), 3.91 – 3.81 (m, 3H), 3.52 (dd, *J* = 4.5, 2.8 Hz, 1H), 2.78 (brs, 1H), 0.93 (s, 9H), 0.84 (s, 9H), 0.03 (s, 6H), 0.00 (s, 3H), -0.18 (s, 3H); <sup>13</sup>C NMR (**6b**, 100 MHz, CDCl<sub>3</sub>) δ 136.23, 131.64, 131.49, 122.32, 94.82, 81.25, 69.78, 68.71, 62.32, 42.89, 25.97, 25.90, 18.39, 18.27, -4.35, -4.82, -5.48, -5.59; HRMS (*m/z*): [M+H]<sup>+</sup> calcd for C<sub>24</sub>H<sub>43</sub>BrNO<sub>6</sub>Si<sub>2</sub><sup>+</sup> 576.1807, found 576.1812; Enantiomeric excess: 98%, determined by HPLC after reduction to corresponding alcohol (Chiralpak IC, hexane/*i*-PrOH = 97:3, flow rate 1.00 mL/min, λ = 220 nm, rt): t<sub>R</sub> (major) = 12.4 min, t<sub>R</sub> (minor) = 21.0 min.

**2,6-Bis-*O*-(*tert*-butyldimethylsilyl)-3,4-dideoxy-3-(4-methoxyphenyl)-4-nitro- $\alpha$ -D-talopyranose (6c)**

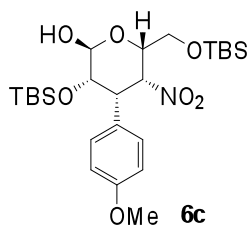

Colorless oil, yield 76%; Equilibrium mixture of **6c** and **5c** (3:1) in CDCl<sub>3</sub>; <sup>1</sup>H NMR (**6c**, 500 MHz, CDCl<sub>3</sub>) δ 7.29 – 7.25 (m, 2H), 6.86 – 6.80 (m, 2H), 5.27 (brs, 1H), 4.73 (dd, *J* = 4.7, 2.6 Hz, 1H), 4.45 (ddd, *J* = 8.6, 6.1, 2.4 Hz, 1H), 3.89 – 3.80 (m, 3H), 3.79 (s, 3H), 3.50 (dd, *J* = 4.6, 2.8 Hz, 1H), 3.29 (brs, 1H), 0.93 (s, 9H), 0.84 (s, 9H), 0.03 (s, 3H), 0.01 (s, 3H), 0.00 (s, 3H), -0.21 (s, 3H); <sup>13</sup>C NMR (**6c**, 100 MHz, CDCl<sub>3</sub>) δ 159.38, 131.11, 129.33, 113.67, 95.05, 81.98, 70.27, 68.67, 62.40, 55.37, 42.67, 25.98, 25.94, 18.38, 18.25, -4.47, -4.90, -5.51, -5.59; HRMS (*m/z*): [M+H]<sup>+</sup> calcd for C<sub>25</sub>H<sub>46</sub>NO<sub>7</sub>Si<sub>2</sub><sup>+</sup> 528.2807, found 528.2807; Enantiomeric excess: 97%, determined by HPLC after reduction to corresponding alcohol (Chiralpak IC, hexane/*i*-PrOH = 95:5, flow rate 1.00 mL/min, λ = 220 nm, rt): t<sub>R</sub> (major) = 15.5 min, t<sub>R</sub> (minor) = 23.7 min.

**2,6-Bis-*O*-(*tert*-butyldimethylsilyl)-3-(3-bromophenyl)-3,4-dideoxy-4-nitro- $\alpha$ -D-talopyranose (6d)**

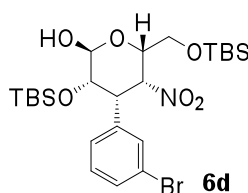

Colorless oil, yield 68%; Equilibrium mixture of **6d** and **5d** (6:1) in CDCl<sub>3</sub>; H NMR (**6d**, 500 MHz, CDCl<sub>3</sub>) δ 7.56 (t, *J* = 1.8 Hz, 1H), 7.45 (ddd, *J* = 8.0, 1.9, 1.0 Hz, 1H), 7.30 (m, 1H), 7.19 (t, *J* = 7.9 Hz, 1H), 5.28 (s, 1H), 4.74 (dd, *J* = 4.7, 2.5 Hz, 1H), 4.45 (td, *J* = 7.7, 2.5 Hz, 1H), 3.91 (dd, *J* = 2.5, 1.5 Hz, 1H), 3.89 – 3.85 (m, 2H), 3.53 (dd, *J* = 4.6, 2.7 Hz, 1H), 2.82 (brs, 1H), 0.95 (s, 9H), 0.84 (s, 9H), 0.05 (s, 3H), 0.03 (s, 3H), 0.01 (s, 3H), -0.13 (s, 3H); <sup>13</sup>C NMR (**6d**, 100 MHz, CDCl<sub>3</sub>) δ 139.58, 132.83, 131.28, 129.93, 128.64, 122.52, 94.87, 81.17, 69.78, 68.90, 62.42, 43.14, 26.03, 25.95, 18.44, 18.33, -4.32, -4.82, -5.42, -5.54; HRMS (*m/z*): [M+H]<sup>+</sup> calcd for C<sub>24</sub>H<sub>43</sub>BrNO<sub>6</sub>Si<sub>2</sub><sup>+</sup> 576.1807, found 576.1807; Enantiomeric excess: 97%, determined by HPLC after reduction to corresponding alcohol (Chiralpak IC, hexane/*i*-PrOH = 98:2, flow rate 1.00 mL/min, λ = 220 nm, rt): t<sub>R</sub> (major) = 34.0 min, t<sub>R</sub> (minor) = 37.6 min.

**(2*S*,3*S*,4*R*,5*S*)-2,6-Bis(*tert*-butyldimethylsilyloxy)-3-(2,6-dichlorophenyl)-5-hydroxy-4-nitrohexanal (**5e**)**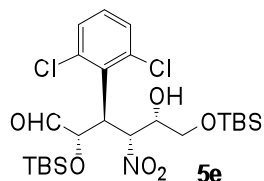

White solid, yield 37%;  $^1\text{H}$  NMR (500 MHz,  $\text{CDCl}_3$ )  $\delta$  9.45 (d,  $J = 3.4$  Hz, 1H), 7.40 (dd,  $J = 8.0, 1.3$  Hz, 1H), 7.32 (dd,  $J = 8.1, 1.3$  Hz, 1H), 7.23 (t,  $J = 8.0$  Hz, 1H), 5.71 (dd,  $J = 10.1, 2.1$  Hz, 1H), 5.21 (t,  $J = 10.2$  Hz, 1H), 4.58 (dd,  $J = 10.1, 3.5$  Hz, 1H), 3.61 (dd,  $J = 9.8, 5.4$  Hz, 1H), 3.58 – 3.52 (m, 1H), 3.45 (dd,  $J = 9.8, 6.9$  Hz, 1H), 2.39 (d,  $J = 8.1$  Hz, 1H), 0.90 (s, 9H), 0.88 (s, 9H), 0.15 (s, 3H), 0.05 (s, 3H), 0.04 (s, 3H), 0.03 (s, 3H);  $^{13}\text{C}$  NMR (100 MHz,  $\text{CDCl}_3$ )  $\delta$  200.04, 138.50, 135.15, 131.46, 130.37, 130.04, 129.69, 86.67, 77.96, 70.48, 63.37, 43.71, 25.96, 18.33, 18.32, -4.45, -4.68, -5.42, -5.50; HRMS ( $m/z$ ):  $[\text{M}+\text{H}]^+$  calcd for  $\text{C}_{24}\text{H}_{42}\text{Cl}_2\text{NO}_6\text{Si}_2^+$  566.1922, found 566.1936; Enantiomeric excess: 99%, determined by HPLC (Chiralpak AD-H, hexane/*i*-PrOH = 97:3, flow rate 1.00 mL/min,  $\lambda = 220$  nm, rt):  $t_R$  (major) = 7.5 min,  $t_R$  (minor) = 9.2 min.

**2,6-Bis-*O*-(*tert*-butyldimethylsilyl)-3,4-dideoxy-4-nitro-3-(thiophen-2-yl)- $\alpha$ -D-talopyranose (**6f**)**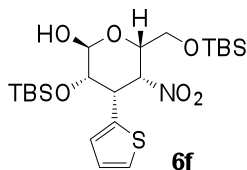

Colorless oil, yield 63%; Equilibrium mixture of **6f** and **5f** (13:1) in  $\text{CDCl}_3$ ;  $^1\text{H}$  NMR (**6f**, 500 MHz,  $\text{CDCl}_3$ )  $\delta$  7.24 (dd,  $J = 5.1, 1.1$  Hz, 1H), 7.08 (d,  $J = 3.0$  Hz, 1H), 6.99 (dd,  $J = 5.2, 3.6$  Hz, 1H), 5.32 (s, 1H), 4.76 (dd,  $J = 4.6, 2.5$  Hz, 1H), 4.46 – 4.40 (m, 1H), 3.97 – 3.93 (m, 1H), 3.92 (dd,  $J = 2.7, 1.4$  Hz, 1H), 3.89 – 3.84 (m, 2H), 2.87 (brs, 1H), 0.93 (s, 9H), 0.85 (s, 9H), 0.05 (s, 3H), 0.03 (s, 3H), 0.01 (s, 3H), -0.08 (s, 3H);  $^{13}\text{C}$  NMR (**6f**, 100 MHz,  $\text{CDCl}_3$ )  $\delta$  138.39, 127.59, 126.90, 124.99, 94.67, 81.94, 70.26, 68.71, 62.45, 39.54, 26.01, 18.42, 18.36, -4.23, -4.64, -5.45, -5.54; HRMS ( $m/z$ ):  $[\text{M}+\text{H}]^+$  calcd for  $\text{C}_{22}\text{H}_{42}\text{NO}_6\text{SSi}_2^+$  504.2266, found 504.2270; Enantiomeric excess: 97%, determined by HPLC after reduction to corresponding alcohol (Chiralpak AD-H, hexane/*i*-PrOH = 97:3, flow rate 1.00 mL/min,  $\lambda = 220$  nm, rt):  $t_R$  (major) = 27.1 min,  $t_R$  (minor) = 20.2 min.

**2,6-Bis-*O*-(*tert*-butyldimethylsilyl)-3,4-dideoxy-4-nitro-3-styryl- $\alpha$ -D-talopyranose (6g)**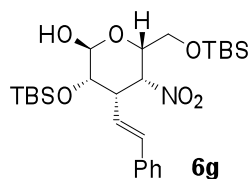

Colorless oil, yield 68%;  $^1\text{H}$  NMR (500 MHz,  $\text{CDCl}_3$ )  $\delta$  7.43 – 7.37 (m, 2H), 7.32 (m, 3H), 6.61 (d,  $J$  = 15.9 Hz, 1H), 6.46 (dd,  $J$  = 15.9, 9.4 Hz, 1H), 5.19 (s, 1H), 4.54 (dd,  $J$  = 4.7, 2.0 Hz, 1H), 4.34 (ddd,  $J$  = 8.5, 6.2, 2.1 Hz, 1H), 4.00 (t,  $J$  = 9.2 Hz, 1H), 3.89 (dd,  $J$  = 9.8, 6.2 Hz, 1H), 3.75 – 3.70 (m, 1H), 3.15 (ddd,  $J$  = 9.3, 4.7, 2.6 Hz, 1H), 2.77 (brs, 1H), 0.90 (s, 9H), 0.85 (s, 9H), 0.04 (s, 6H), 0.02 (s, 3H), -0.01 (s, 3H);  $^{13}\text{C}$  NMR (100 MHz,  $\text{CDCl}_3$ )  $\delta$  136.98, 133.18, 128.89, 128.01, 126.73, 126.58, 94.94, 79.86, 70.65, 68.67, 62.48, 42.60, 26.04, 25.75, 18.45, 18.18, -4.44, -5.01, -5.38, -5.51; HRMS ( $m/z$ ):  $[\text{M}+\text{H}]^+$  calcd for  $\text{C}_{26}\text{H}_{46}\text{NO}_6\text{Si}_2^+$  524.2858, found 524.2859; Enantiomeric excess: 93%, determined by HPLC after reduction to corresponding alcohol (Chiralpak IC, hexane/*i*-PrOH = 97:3, flow rate 1.00 mL/min,  $\lambda$  = 220 nm, rt):  $t_{\text{R}}$  (major) = 14.9 min,  $t_{\text{R}}$  (minor) = 12.1 min.

**2,6-Bis-*O*-(*tert*-butyldimethylsilyl)-3,4-dideoxy-3-(*n*-heptyl)-4-nitro- $\alpha$ -D-talopyranose (6h)**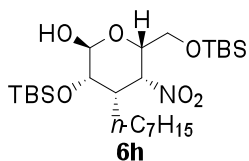

Colorless oil, yield 44%;  $^1\text{H}$  NMR (500 MHz,  $\text{CDCl}_3$ )  $\delta$  5.16 (s, 1H), 4.50 (d,  $J$  = 2.5 Hz, 1H), 4.22 (t,  $J$  = 8.4 Hz, 1H), 3.92 (t,  $J$  = 9.1 Hz, 1H), 3.84 (dd,  $J$  = 9.8, 6.2 Hz, 1H), 3.65 (s, 1H), 2.69 (brs, 1H), 2.24 (ddd,  $J$  = 8.8, 5.8, 3.5 Hz, 1H), 1.55 – 1.42 (m, 1H), 1.39 – 1.20 (m, 11H), 0.87 (t,  $J$  = 6.2 Hz, 3H), 0.86 (s, 9H), 0.86 (s, 9H), 0.05 (s, 3H), 0.03 (s, 3H), 0.02 (s, 6H);  $^{13}\text{C}$  NMR (100 MHz,  $\text{CDCl}_3$ )  $\delta$  94.97, 78.82, 69.14, 62.51, 38.68, 32.01, 29.77, 29.43, 29.15, 26.72, 26.00, 25.71, 22.85, 18.40, 18.16, 14.29, -4.31, -5.01, -5.39, -5.54; HRMS ( $m/z$ ):  $[\text{M}+\text{H}]^+$  calcd for  $\text{C}_{25}\text{H}_{54}\text{NO}_6\text{Si}_2^+$  520.3484, found 520.3487; Enantiomeric excess: 96%, determined by HPLC after transformation into corresponding *O*-benzyl aldoxime (Chiralpak AD-H, hexane/*i*-PrOH = 99.5:0.5, flow rate 1.00 mL/min,  $\lambda$  = 220 nm, rt):  $t_{\text{R}}$  (major) = 19.9 min,  $t_{\text{R}}$  (minor) = 17.0 min.

**Typical experimental procedure for (2*S*,3*S*,4*R*,5*S*)-2,6-Bis(*tert*-butyldimethylsilyloxy)-4-nitro-3-phenylhexane-1,5-diol (**6a'**, for HPLC analysis)**

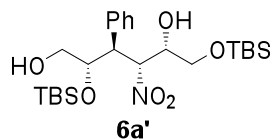

To a solution of 3,4-dideoxy-D-talose derivative **6a** (33.3 mg, 67  $\mu$ mol) in MeOH (1.3 mL) was added NaBH<sub>4</sub> (12.7 mg, 340  $\mu$ mol) at 0 °C. After stirring for 30 min, aqueous NH<sub>4</sub>Cl and Et<sub>2</sub>O were added. The aqueous layer was separated and extracted three times with Et<sub>2</sub>O. The combined organic layers were washed with brine, dried over MgSO<sub>4</sub>, concentrated, and purified by flash column chromatography to afford corresponding alcohol **6a'** as a colorless oil (18.2 mg, 34  $\mu$ mol, yield 54%).  
<sup>1</sup>H NMR (400 MHz, CDCl<sub>3</sub>)  $\delta$  7.38 – 7.23 (m, 5H), 5.22 (dd, *J* = 11.4, 2.5 Hz, 1H), 4.07 (dd, *J* = 11.4, 6.1 Hz, 1H), 3.97 (ddd, *J* = 6.0, 5.3, 4.0 Hz, 1H), 3.57 – 3.44 (m, 3H), 3.43 – 3.33 (m, 2H), 2.54 (d, *J* = 8.5 Hz, 1H), 0.90 (s, 9H), 0.87 (s, 9H), 0.16 (s, 3H), 0.08 (s, 3H), 0.01 (s, 3H), -0.01 (s, 3H);  
<sup>13</sup>C NMR(100 MHz, CDCl<sub>3</sub>)  $\delta$  137.09, 129.64, 129.11, 128.03, 88.73, 75.16, 70.02, 64.05, 63.57, 48.43, 26.10, 25.93, 18.34, 18.30, -4.37, -4.47, -5.48, -5.50; HRMS (*m/z*): [M+H]<sup>+</sup> calcd for C<sub>24</sub>H<sub>46</sub>NO<sub>6</sub>Si<sub>2</sub><sup>+</sup> 500.2858, found 500.2856.

**General procedure for 3,4-dideoxy-D-mannose derivatives 7 (Table 3).**

(*tert*-Butyldimethylsilyloxy)acetaldehyde **1** (152  $\mu$ L, 0.8 mmol) was added to the solution of thiourea catalyst **3** (15.4 mg, 40  $\mu$ mol) and nitroolefin **2** (0.2 mmol) in CH<sub>2</sub>Cl<sub>2</sub> (0.2 mL). The resulting solution was stirred at 30 °C for T<sub>1</sub>, and then DBU (15.0  $\mu$ L, 0.1 mmol) was added. After T<sub>2</sub> at 30 °C, Et<sub>2</sub>O and 1N HCl (0.2 mL) was added to the solution at rt. The aqueous layer was separated and extracted three times with Et<sub>2</sub>O. The combined organic layers were dried over MgSO<sub>4</sub>, concentrated, and purified by flash column chromatography to afford 3,4-dideoxy-D-mannose derivative **7**.

**2,6-Bis-*O*-(*tert*-butyldimethylsilyl)-3,4-dideoxy-4-nitro-3-phenyl- $\alpha$ -D-mannopyranose (**7a**)**

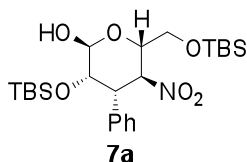

Colorless oil, yield 51%; <sup>1</sup>H NMR (400 MHz, CDCl<sub>3</sub>)  $\delta$  7.33 – 7.21 (m, 5H), 5.47 (dd, *J* = 12.0, 9.8 Hz, 1H), 5.13 (d, *J* = 1.3 Hz, 1H), 4.47 (dt, *J* = 9.8, 3.5 Hz, 1H), 3.94 (dd, *J* = 12.0, 2.5 Hz, 1H), 3.82 – 3.77 (m, 2H), 3.74 (dd, *J* = 11.5, 3.9 Hz, 1H), 3.14 (brs, 1H), 0.93 (s, 9H), 0.83 (s, 9H), 0.08 (s, 3H),

0.08 (s, 3H), -0.21 (s, 3H), -0.57 (s, 3H);  $^{13}\text{C}$  NMR (100 MHz,  $\text{CDCl}_3$ )  $\delta$  136.18, 129.08, 128.60, 127.92, 94.33, 82.45, 72.45, 71.32, 63.15, 45.66, 26.07, 25.95, 18.53, 18.13, -5.22, -5.24, -5.47, -5.73; HRMS ( $m/z$ ):  $[\text{M}+\text{H}]^+$  calcd for  $\text{C}_{24}\text{H}_{44}\text{NO}_6\text{Si}_2^+$  498.2702, found 498.2705; Enantiomeric excess: 98%, determined by HPLC (Chiralpak AD-H, hexane/*i*-PrOH = 99:1, flow rate 1.00 mL/min,  $\lambda$  = 220 nm, rt):  $t_{\text{R}}$  (major) = 11.6 min,  $t_{\text{R}}$  (minor) = 8.8 min.

**2,6-Bis-*O*-(*tert*-butyldimethylsilyl)-3-(4-bromophenyl)-3,4-dideoxy-4-nitro- $\alpha$ -D-mannopyranose (7b)**

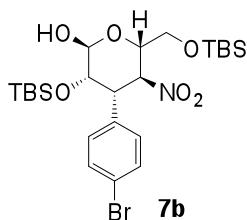

Colorless oil, yield 65% ;  $^1\text{H}$  NMR (500 MHz,  $\text{CDCl}_3$ )  $\delta$  7.44 (m, 2H), 7.18 (m, 2H), 5.40 (dd,  $J$  = 12.0, 9.8 Hz, 1H), 5.13 (s, 1H), 4.47 – 4.40 (m, 1H), 3.89 (dd,  $J$  = 12.0, 2.4 Hz, 1H), 3.78 (dd,  $J$  = 11.4, 3.3 Hz, 1H), 3.77 (m, 1H), 3.72 (dd,  $J$  = 11.4, 3.6 Hz, 1H), 2.95 (brs, 1H), 0.92 (s, 9H), 0.84 (s, 9H), 0.07 (s, 3H), 0.07 (s, 3H), -0.16 (s, 3H), -0.50 (s, 3H);  $^{13}\text{C}$  NMR (100 MHz,  $\text{CDCl}_3$ )  $\delta$  135.23, 131.74, 130.84, 122.00, 94.15, 82.33, 72.09, 71.17, 63.03, 45.30, 26.05, 25.93, 18.51, 18.13, -5.12, -5.24, -5.50; HRMS ( $m/z$ ):  $[\text{M}+\text{H}]^+$  calcd for  $\text{C}_{24}\text{H}_{43}\text{BrNO}_6\text{Si}_2^+$  576.1807, found 576.1803; Enantiomeric excess: 96%, determined by HPLC (Chiralpak AD-H, hexane/*i*-PrOH = 99:1, flow rate 1.00 mL/min,  $\lambda$  = 220 nm, rt):  $t_{\text{R}}$  (major) = 25.1 min,  $t_{\text{R}}$  (minor) = 15.7 min.

**2,6-Bis-*O*-(*tert*-butyldimethylsilyl)-3,4-dideoxy-3-(4-methoxyphenyl)-4-nitro- $\alpha$ -D-mannopyranose (7c)**

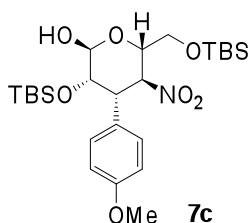

Colorless oil, yield 48%;  $^1\text{H}$  NMR (300 MHz,  $\text{CDCl}_3$ )  $\delta$  7.23-7.20 (m, 2H), 6.85-6.82 (m, 2H), 5.41 (dd,  $J$  = 11.9, 9.8 Hz, 1H), 5.13 (d,  $J$  = 1.0 Hz, 1H), 4.45 (dt,  $J$  = 9.6, 3.5 Hz, 1H), 3.86 (dd,  $J$  = 12.1, 2.4 Hz, 1H), 3.82 – 3.68 (m, 3H), 3.75 (s, 3H), 2.76 (d,  $J$  = 3.2 Hz, 1H), 0.92 (s, 9H), 0.85 (s, 9H), 0.07 (s, 6H), -0.18 (s, 3H), -0.50 (s, 3H);  $^{13}\text{C}$  NMR (100 MHz,  $\text{CDCl}_3$ )  $\delta$  159.32, 130.16, 128.10,



113.97, 94.35, 82.74, 72.32, 71.31, 63.10, 55.45, 44.93, 26.03, 25.95, 18.49, 18.12, -5.21, -5.52; HRMS ( $m/z$ ):  $[M+H]^+$  calcd for  $C_{25}H_{46}NO_7Si_2^+$  528.2807, found 528.2627; Enantiomeric excess: 95%, determined by HPLC (Chiralpak AD-H, hexane/*i*-PrOH = 95:5, flow rate 1.00 mL/min,  $\lambda$  = 220 nm, rt):  $t_R$  (major) = 12.7 min,  $t_R$  (minor) = 9.4 min.

**2,6-Bis-*O*-(*tert*-butyldimethylsilyl)-3-(3-bromophenyl)-3,4-dideoxy-4-nitro- $\alpha$ -D-mannopyranose (7d)**

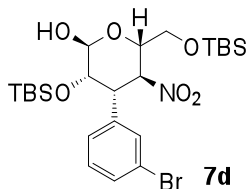

Colorless oil, yield 57%;  $^1H$  NMR (400 MHz,  $CDCl_3$ )  $\delta$  7.47 (brs, 1H), 7.40 (brd,  $J$  = 7.8 Hz, 1H), 7.34 – 7.12 (m, 2H), 5.40 (d,  $J$  = 10.7 Hz, 1H), 5.13 (brs, 1H), 4.45 (d,  $J$  = 9.2 Hz, 1H), 3.90 (d,  $J$  = 13.5 Hz, 1H), 3.79 – 3.74 (m, 3H), 2.79 (brs, 1H), 0.92 (s, 9H), 0.86 (s, 9H), 0.07 (s, 6H), -0.15 (s, 3H), -0.49 (s, 3H);  $^{13}C$  NMR (100 MHz,  $CDCl_3$ )  $\delta$  138.49, 132.11, 131.12, 130.15, 127.84, 122.66, 94.11, 82.33, 72.04, 71.11, 63.06, 45.44, 26.02, 25.89, 18.49, 18.11, -5.19, -5.26, -5.52, -5.61; HRMS ( $m/z$ ):  $[M+H]^+$  calcd for  $C_{24}H_{43}BrNO_6Si_2^+$  576.1801, found 576.1801; Enantiomeric excess: 98%, determined by HPLC (Chiralpak AD-H, hexane/*i*-PrOH = 95:5, flow rate 1.00 mL/min,  $\lambda$  = 220 nm, rt):  $t_R$  (major) = 10.0 min,  $t_R$  (minor) = 8.7 min.

**2,6-Bis-*O*-(*tert*-butyldimethylsilyl)-3,4-dideoxy-4-nitro-3-(thiophen-2-yl)- $\alpha$ -D-mannopyranose (7f)**

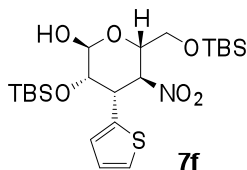

Colorless oil, yield 59%;  $^1H$  NMR (500 MHz,  $CDCl_3$ )  $\delta$  7.19 (d,  $J$  = 5.1 Hz, 1H), 6.99 – 6.86 (m, 2H), 5.27 (dd,  $J$  = 11.7, 9.9 Hz, 1H), 5.16 (s, 1H), 4.44 (dt,  $J$  = 9.8, 3.5 Hz, 1H), 4.24 (dd,  $J$  = 11.8, 2.4 Hz, 1H), 3.88 (s, 1H), 3.77 (dd,  $J$  = 11.5, 3.3 Hz, 1H), 3.72 (dd,  $J$  = 11.4, 3.8 Hz, 1H), 2.84 (brs, 1H), 0.91 (s, 9H), 0.88 (s, 9H), 0.06 (s, 6H), -0.09 (s, 3H), -0.31 (s, 3H);  $^{13}C$  NMR (100 MHz,  $CDCl_3$ )  $\delta$  138.08, 126.99, 126.83, 125.20, 94.02, 84.26, 72.05, 71.33, 63.15, 41.59, 26.05, 18.52, 18.22, -4.95, -5.25, -5.50; HRMS ( $m/z$ ):  $[M+H]^+$  calcd for  $C_{22}H_{42}NO_6SSi_2^+$  504.2266, found 504.2267; Enantiomeric

excess: 96%, determined by HPLC (Chiralpak AD-H, hexane/*i*-PrOH = 99:1, flow rate 1.00 mL/min,  $\lambda = 220$  nm, rt):  $t_R$  (major) = 33.7 min,  $t_R$  (minor) = 19.6 min.

**2,6-Bis-*O*-(*tert*-butyldimethylsilyl)-3,4-dideoxy-4-nitro-3-styryl- $\alpha$ -D-mannopyranose (7g)**

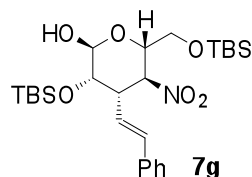

Colorless oil, yield 66% ;  $^1\text{H}$  NMR (500 MHz,  $\text{CDCl}_3$ )  $\delta$  7.35 – 7.18 (m, 5H), 6.49 (d,  $J = 16.0$  Hz, 1H), 6.19 (dd,  $J = 16.0, 9.3$  Hz, 1H), 5.08 (d,  $J = 1.3$  Hz, 1H), 4.94 (dd,  $J = 11.2, 10.2$  Hz, 1H), 4.43 (dt,  $J = 10.1, 3.6$  Hz, 1H), 3.87 – 3.82 (m, 1H), 3.76 – 3.69 (m, 2H), 3.36 (ddd,  $J = 11.7, 9.5, 2.5$  Hz, 1H), 0.95 (s, 9H), 0.90 (s, 9H), 0.06 (s, 3H), 0.05 (s, 6H), 0.04 (s, 3H);  $^{13}\text{C}$  NMR (100 MHz,  $\text{CDCl}_3$ )  $\delta$  136.64, 134.74, 128.78, 128.06, 126.71, 124.36, 94.09, 84.04, 71.37, 70.32, 63.32, 44.59, 26.07, 25.96, 18.53, 18.27, -4.52, -4.58, -5.25, -5.51. HRMS ( $m/z$ ):  $[\text{M}+\text{H}]^+$  calcd for  $\text{C}_{26}\text{H}_{46}\text{NO}_6\text{Si}_2^+$  524.2858, found 524.2860; Enantiomeric excess: 93%, determined by HPLC (Chiralpak AD-H, hexane/*i*-PrOH = 99:1, flow rate 1.00 mL/min,  $\lambda = 220$  nm, rt):  $t_R$  (major) = 20.4 min,  $t_R$  (minor) = 16.9 min.

**2,6-Bis-*O*-(*tert*-butyldimethylsilyl)-3,4-dideoxy-3-(*n*-heptyl)-4-nitro- $\alpha$ -D-mannopyranose (7h)**

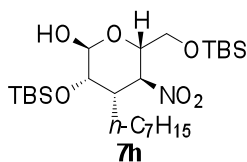

Colorless oil, yield 50% ;  $^1\text{H}$  NMR (500 MHz,  $\text{CDCl}_3$ )  $\delta$  5.08 (s, 1H), 4.67 (t,  $J = 11.3$  Hz, 1H), 4.33 (dt,  $J = 10.0, 3.7$  Hz, 1H), 3.84 (t,  $J = 2.0$  Hz, 1H), 3.68 – 3.64 (m, 2H), 2.82 (brs, 1H), 2.51 (tt,  $J = 11.3, 2.8$  Hz, 1H), 1.59 – 1.50 (m, 1H), 1.40 – 1.06 (m, 11H), 0.90 (s, 9H), 0.88 (s, 9H), 0.86 (t,  $J = 7.1$  Hz, 3H), 0.08 (s, 3H), 0.07 (s, 3H), 0.03 (s, 6H);  $^{13}\text{C}$  NMR (100 MHz,  $\text{CDCl}_3$ )  $\delta$  94.00, 85.63, 70.81, 68.21, 63.40, 39.16, 31.96, 29.60, 29.39, 26.79, 26.15, 26.04, 25.91, 22.81, 18.51, 18.25, 14.26, -4.20, -4.70, -5.31, -5.54; HRMS ( $m/z$ ):  $[\text{M}+\text{H}]^+$  calcd for  $\text{C}_{25}\text{H}_{54}\text{NO}_6\text{Si}_2^+$  520.3484, found 520.3483; Enantiomeric excess: 96%, determined by HPLC (Chiralpak AD-H, hexane/*i*-PrOH = 99:1, flow rate 0.50 mL/min, rt, RI):  $t_R$  (major) = 15.6 min,  $t_R$  (minor) = 11.1 min.

**1,3-Bis((1*R*,2*R*)-2-aminocyclohexyl)thiourea (11)**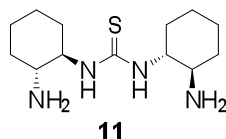

A mixture of 1,3-bis((1*R*,2*R*)-2-(1,3-dioxisoindolin-2-yl)cyclohexyl)thiourea (1.06 g, 2 mmol) (ref. S3) and hydrazine hydrate (485  $\mu$ L, 10 mmol) in EtOH (10.6 mL) was refluxed for 1 h. After the reaction mixture was cooled to rt and filtered. The filtrate was evaporated and the residue was purified by flash column chromatography to afford **11** as colorless crystals (266 mg, 0.983 mmol, yield 49%).  $^1\text{H}$  NMR (300 MHz,  $\text{CDCl}_3$ )  $\delta$  2.60-2.52 (m, 2H), 2.13 – 2.03 (m, 2H), 1.98 – 1.84 (m, 2H), 1.84 – 1.35 (m, 10H), 1.32 – 1.14 (m, 8H);  $^{13}\text{C}$  NMR (100 MHz,  $\text{CDCl}_3$ )  $\delta$  182.92, 62.06, 56.20, 32.62, 25.07, 25.00; HRMS ( $m/z$ ):  $[\text{M}+\text{H}]^+$  calcd for  $\text{C}_{13}\text{H}_{27}\text{N}_4\text{S}^+$  271.1951, found 271.1949.

**Acetylation of 3,4-dideoxy-D-talose derivatives 6: 1-*O*-Acetyl-2,6-bis-*O*-(*tert*-butyldimethylsilyl)-3,4-dideoxy-4-nitro-3-phenyl- $\alpha$ -D-talopyranose (12a)**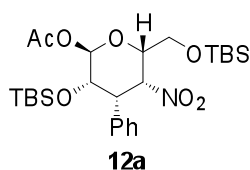

To a solution of 3,4-dideoxy-D-talose derivative **6a** (192 mg, 0.39 mmol) in pyridine (0.5 mL) was added  $\text{Ac}_2\text{O}$  (0.5 mL) at rt. After stirring for 40 min, toluene was added to the mixture and resulting solution was concentrated in vacuo. The residue was purified by flash column chromatography to afford acetyl talopyranose derivative **12a** as a colorless oil (128 mg, 0.24 mmol, yield 61%).  $^1\text{H}$  NMR (400 MHz,  $\text{CDCl}_3$ )  $\delta$  7.40 – 7.30 (m, 5H), 6.19 (brs, 1H), 4.85 (dd,  $J = 4.6, 2.6$  Hz, 1H), 4.31 (ddd,  $J = 8.6, 6.1, 2.5$  Hz, 1H), 3.94 – 3.83 (m, 3H), 3.47 (dd,  $J = 4.6, 2.8$  Hz, 1H), 2.16 (s, 3H), 0.94 (s, 9H), 0.84 (s, 9H), 0.10 (s, 3H), 0.03 (s, 3H), 0.01 (s, 3H), -0.18 (s, 3H);  $^{13}\text{C}$  NMR (100 MHz,  $\text{CDCl}_3$ )  $\delta$  168.95, 136.62, 129.79, 128.47, 128.35, 93.98, 80.91, 71.07, 68.91, 62.05, 44.03, 25.95, 25.89, 21.36, 18.35, 18.27, -4.38, -5.05, -5.51, -5.63; HRMS ( $m/z$ ):  $[\text{M}+\text{Na}]^+$  calcd for  $\text{C}_{26}\text{H}_{45}\text{NNaO}_7\text{Si}_2^+$  562.2627, found 562.2626.

**1-*O*-Acetyl-2,6-bis-*O*-(*tert*-butyldimethylsilyl)-3-(4-bromophenyl)-3,4-dideoxy-4-nitro- $\alpha$ -D-talopyranose (**12b**)**

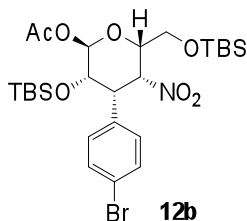

Colorless oil, yield 56%;  $^1\text{H}$  NMR (400 MHz,  $\text{CDCl}_3$ )  $\delta$  7.48 – 7.44 (m, 2H), 7.29 – 7.24 (m, 2H), 6.17 (brs, 1H), 4.79 (dd,  $J = 4.5, 2.6$  Hz, 1H), 4.29 (ddd,  $J = 8.6, 6.2, 2.5$  Hz, 1H), 3.93 – 3.83 (m, 3H), 3.43 (dd,  $J = 4.5, 2.8$  Hz, 1H), 2.16 (s, 3H), 0.93 (s, 9H), 0.83 (s, 9H), 0.11 (s, 3H), 0.03 (s, 3H), -0.00 (s, 3H), -0.14 (s, 3H);  $^{13}\text{C}$  NMR (100 MHz,  $\text{CDCl}_3$ )  $\delta$  168.86, 135.66, 131.59, 131.49, 122.57, 93.71, 80.61, 70.94, 68.76, 61.97, 43.51, 25.93, 25.86, 21.34, 18.33, 18.27, -4.33, -4.90, -5.51, -5.66; HRMS ( $m/z$ ):  $[\text{M}+\text{Na}]^+$  calcd for  $\text{C}_{26}\text{H}_{44}\text{BrNNaO}_7\text{Si}_2^+$  618.1732, found 618.1732.

**Epimerization of **12a**: 1-*O*-Acetyl-2,6-bis-*O*-(*tert*-butyldimethylsilyl)-3,4-dideoxy-4-nitro-3-phenyl- $\alpha$ -D-mannopyranose (**13a**)**

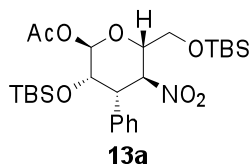

To a solution of acetyl talopyranose derivative **12a** (28 mg, 52  $\mu\text{mol}$ ) in  $\text{CH}_2\text{Cl}_2$  (0.1 mL) was added DBU (3.9  $\mu\text{L}$ , 26  $\mu\text{mol}$ ) at 30  $^\circ\text{C}$ . After 0.5 h at 30  $^\circ\text{C}$ ,  $\text{Et}_2\text{O}$  and 1N HCl (0.1 mL) was added to the solution at rt. The aqueous layer was separated and extracted three times with  $\text{Et}_2\text{O}$ . The combined organic layers were dried over  $\text{MgSO}_4$ , concentrated, and purified by flash column chromatography to afford acetyl mannopyranose derivative **13a** as a colorless oil (22 mg, 40  $\mu\text{mol}$ , yield 77%).  $^1\text{H}$  NMR (400 MHz,  $\text{CDCl}_3$ )  $\delta$  7.34 – 7.23 (m, 5H), 5.99 (d,  $J = 1.6$  Hz, 1H), 5.56 (dd,  $J = 12.0, 9.9$  Hz, 1H), 4.30 (dt,  $J = 9.8, 3.3$  Hz, 1H), 3.82 (dd,  $J = 11.4, 3.5$  Hz, 1H), 3.81 (dd,  $J = 12.0, 2.7$  Hz, 1H), 3.77 – 3.74 (m, 1H), 3.72 (dd,  $J = 11.6, 3.3$  Hz, 1H), 2.23 (s, 3H), 0.92 (s, 9H), 0.84 (s, 9H), 0.07 (s, 6H), -0.13 (s, 3H), -0.57 (s, 3H);  $^{13}\text{C}$  NMR (100 MHz,  $\text{CDCl}_3$ )  $\delta$  169.18, 135.45, 129.03, 128.70, 128.20, 93.36, 81.77, 73.35, 71.23, 62.71, 46.41, 26.00, 25.91, 21.41, 18.43, 18.09, -5.24, -5.28, -5.54, -5.84; HRMS ( $m/z$ ):  $[\text{M}+\text{Na}]^+$  calcd for  $\text{C}_{26}\text{H}_{45}\text{NNaO}_7\text{Si}_2^+$  562.2627, found 562.2620.

**Reduction of 12a: 1-*O*-Acetyl-4-(*tert*-butoxycarbonylamino)-2,6-bis-*O*-(*tert*-butyldimethylsilyl)-3,4-dideoxy-3-phenyl- $\alpha$ -D-talopyranose (14)**

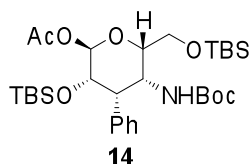

A solution of acetyl talopyranose derivative **12a** (7.0 mg, 13  $\mu$ mol) in AcOH (0.3 mL) was added to Zn (24mg, 0.37 mmol, activated by 1N HCl then washed with H<sub>2</sub>O, EtOH, Et<sub>2</sub>O) at rt. After stirring for 1 h, Et<sub>2</sub>O, saturated aqueous NaHCO<sub>3</sub> and Na<sub>2</sub>CO<sub>3</sub> were added to the solution at rt. The aqueous layer was separated and extracted three times with Et<sub>2</sub>O. The combined organic layers were dried over MgSO<sub>4</sub>, concentrated, and purified by short column chromatography to afford corresponding primary amine, which was used to the next reaction without further purification. To a solution of the amine in Et<sub>2</sub>O (0.5 mL), Boc<sub>2</sub>O (15 mg, 68  $\mu$ mol) was added at rt. After stirring for 16 h, the mixture was concentrated, and purified by flash column chromatography to afford 4-amino-3,4-dideoxy-3-phenyl-D-talose derivative **14** as a colorless oil (4.3 mg, 7.1  $\mu$ mol, yield 54%). <sup>1</sup>H NMR (400 MHz, CDCl<sub>3</sub>)  $\delta$  7.39 – 7.35 (m, 2H), 7.32 – 7.18 (m, 3H), 6.24 (d, *J* = 9.9 Hz, 1H), 6.07 (d, *J* = 1.3 Hz, 1H), 4.25 (brd, *J* = 9.5 Hz, 1H), 4.09 (ddd, *J* = 6.5, 5.0, 1.5 Hz, 1H), 4.00 (dt, *J* = 2.5, 1.3 Hz, 1H), 3.84 (dd, *J* = 10.9, 4.9 Hz, 1H), 3.69 (dd, *J* = 10.9, 6.8 Hz, 1H), 3.20 (t, *J* = 2.6 Hz, 1H), 2.15 (s, 3H), 1.40 (s, 9H), 0.89 (s, 9H), 0.85 (s, 9H), 0.08 (s, 3H), 0.07 (s, 3H), 0.06 (s, 3H), -0.30 (s, 3H); <sup>13</sup>C NMR (150 MHz, CDCl<sub>3</sub>)  $\delta$  169.37, 155.77, 138.96, 128.56, 128.40, 127.10, 94.51, 78.95, 76.55, 71.42, 63.48, 48.26, 42.34, 28.61, 26.13, 25.92, 21.40, 18.56, 17.96, -4.36, -5.11, -5.14, -5.55; HRMS (*m/z*): [M+H]<sup>+</sup> calcd for C<sub>31</sub>H<sub>56</sub>NO<sub>7</sub>Si<sub>2</sub><sup>+</sup> 610.3590, found 610.3592.

**Reduction of 13a: 1-*O*-Acetyl-4-(*tert*-butoxycarbonylamino)-2,6-bis-*O*-(*tert*-butyldimethylsilyl)-3,4-dideoxy-3-phenyl- $\alpha$ -D-mannopyranose (15)**

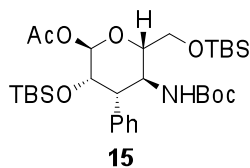

To a solution of acetyl mannopyranose derivative **13a** (12.3 mg, 23  $\mu$ mol) in EtOH (0.3 mL) was added Raney Ni (c.a. 50mg, washed with EtOH) in EtOH (0.3 mL) at rt. After stirring for 24 h under hydrogen atmosphere at rt, Boc<sub>2</sub>O (15 mg, 68  $\mu$ mol) was added to the solution. After stirring for 24 h at rt, the mixture was filtered through Celite. The filtrate was concentrated, and purified by flash

column chromatography to afford 4-amino-3,4-dideoxy-3-phenyl-D-mannose derivative **15** as a colorless oil (11.0 mg, 18  $\mu$ mol, yield 79%).  $^1\text{H}$  NMR (600 MHz,  $\text{CDCl}_3$ )  $\delta$  7.30 – 7.19 (m, 5H), 5.96 (brs, 1H), 4.28 (brq,  $J = 10.4$  Hz, 1H), 4.17 (brd,  $J = 9.5$  Hz, 1H), 3.88 (brd,  $J = 10.4$  Hz, 1H), 3.85 – 3.77 (m, 2H), 3.72 (brs, 1H), 3.19 (brd,  $J = 11.6$  Hz, 1H), 2.16 (s, 3H), 1.28 (brs, 9H), 0.91 (s, 9H), 0.81 (brs, 9H), 0.08 (s, 3H), 0.08 (s, 3H), -0.15 (s, 3H), -0.63 (s, 3H);  $^{13}\text{C}$  NMR (150 MHz,  $\text{CDCl}_3$ )  $\delta$  170.01, 156.18, 138.89, 130.17, 128.92, 127.71, 94.43, 80.14, 77.82, 72.52, 64.90, 48.25, 45.54, 29.02, 26.84, 26.60, 22.08, 19.26, 18.74, -4.27, -4.41, -4.53, -5.26; HRMS ( $m/z$ ):  $[\text{M}+\text{H}]^+$  calcd for  $\text{C}_{31}\text{H}_{56}\text{NO}_7\text{Si}_2^+$  610.3590, found 610.3591.

**Tandem *anti*-Michael–Henry reaction: (2*S*,3*R*,4*S*,5*S*,6*S*)-Ethyl 5-((*tert*-butyldimethylsilyl)oxy)-6-hydroxy-3-nitro-4-phenyltetrahydro-2*H*-pyran-2-carboxylate (**17**)**

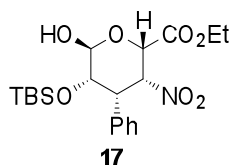

(*tert*-Butyldimethylsilyloxy)acetaldehyde **1** (304  $\mu$ L, 1.6 mmol) was added to the solution of thiourea catalyst **3** (31 mg, 0.08 mmol) and  $\beta$ -nitrostyrene **2a** (60 mg, 0.4 mmol) in  $\text{CH}_2\text{Cl}_2$  (0.4 mL). The resulting solution was stirred at 30  $^\circ\text{C}$  for 8 h. To the reaction mixture was added 50% ethyl glyoxylate in toluene solution (317  $\mu$ L, 1.6 mmol), and then triethylamine (28  $\mu$ L, 0.2 mmol) at rt. After 0.5 h at rt, sat  $\text{NH}_4\text{Cl}$  aq. was added to the solution at rt. The mixture was extracted three times with AcOEt. The combined organic layers were dried over  $\text{Na}_2\text{SO}_4$ , concentrated, and purified by flash column chromatography to afford **17** as a colorless oil (91.6 mg, 215  $\mu$ mol, yield 54%). Equilibrium mixture of **17** and its open form (3:1) in  $\text{CDCl}_3$ .  $^1\text{H}$  NMR (**17**, 300 MHz,  $\text{CDCl}_3$ )  $\delta$  7.49 – 7.29 (m, 5H), 5.48 (m, 1H), 5.13 (m, 1H), 4.93 (d,  $J = 2.3$  Hz, 1H), 4.47 – 4.11 (m, 3H), 4.06 ( $J = 3.2$  Hz, 1H), 3.83 (d,  $J = 3.6$  Hz, 1H), 1.25 (t,  $J = 7.1$  Hz, 3H), 0.91 (9H), 0.13 (s, 3H), 0.07 (s, 3H);  $^{13}\text{C}$  NMR (**17**, 100 MHz,  $\text{CDCl}_3$ )  $\delta$  168.50, 137.74, 129.11, 128.34, 127.81, 94.72, 81.34, 69.69, 68.17, 43.01, 25.81, 18.31, 14.18, -3.66, -4.61; HRMS ( $m/z$ ):  $[\text{M}+\text{H}]^+$  calcd for  $\text{C}_{20}\text{H}_{32}\text{NO}_7\text{Si}^+$  426.1942, found 426.1946. Enantiomeric excess: 98%, determined by HPLC after reduction to corresponding alcohol (Chiralpak AD-H, hexane/*i*-PrOH = 90:10, flow rate 1.00 mL/min,  $\lambda = 220$  nm, rt):  $t_R$  (major) = 24.4 min,  $t_R$  (minor) = 22.0 min.

**(2S,3S,4S,5S,6S)-Ethyl 5-((*tert*-butyldimethylsilyl)oxy)-6-hydroxy-3-nitro-4-phenyltetrahydro-2H-pyran-2-carboxylate (18)**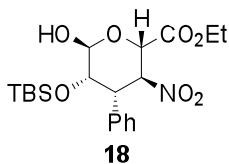

(*tert*-Butyldimethylsilyloxy)acetaldehyde **1** (152  $\mu$ L, 0.8 mmol) was added to the solution of thiourea catalyst **3** (15.8 mg, 0.04 mmol) and  $\beta$ -nitrostyrene **2a** (30 mg, 0.2 mmol) in  $\text{CH}_2\text{Cl}_2$  (0.2 mL). The resulting solution was stirred at 30  $^\circ\text{C}$  for 5 h. To the reaction mixture was added 50% ethyl glyoxylate in toluene solution (159  $\mu$ L, 0.8 mmol), and then DBU (60  $\mu$ L, 0.4 mmol) at 30  $^\circ\text{C}$ . After 1 h at rt, sat  $\text{NH}_4\text{Cl}$  aq. was added to the solution at rt. The mixture was extracted three times with AcOEt. The combined organic layers were dried over  $\text{Na}_2\text{SO}_4$ , concentrated, and purified by flash column chromatography to afford **18** as a colorless oil (62.0 mg, 148  $\mu$ mol, yield 74%).  $^1\text{H}$  NMR (400 MHz,  $\text{CDCl}_3$ )  $\delta$  7.37 – 7.29 (m, 5H), 5.43 (dd,  $J = 11.9, 10.2$  Hz, 1H), 5.23 (dd,  $J = 3.4, 1.2$  Hz, 1H), 5.09 (d,  $J = 10.2$  Hz, 1H), 4.42 – 4.17 (m, 2H), 4.39 – 4.19 (m, 2H), 3.91 (dd,  $J = 11.9, 2.5$  Hz, 1H), 3.85 – 3.79 (m, 1H), 3.20 (d,  $J = 3.7$  Hz, 1H), 1.29 (t,  $J = 7.1$  Hz, 1H), 0.85 (s, 9H), -0.20 (s, 3H), -0.54 (s, 3H);  $^{13}\text{C}$  NMR (100 MHz,  $\text{CDCl}_3$ )  $\delta$  168.02, 135.16, 129.16, 128.65, 128.22, 94.50, 82.29, 72.03, 69.61, 62.61, 46.02, 25.96, 18.08, 14.06, -5.19, -5.72; HRMS ( $m/z$ ):  $[\text{M}+\text{H}]^+$  calcd for  $\text{C}_{20}\text{H}_{32}\text{NO}_7\text{Si}^+$  426.1944, found 426.1946. Enantiomeric excess: 98%, determined by HPLC after reduction to corresponding alcohol (Chiralpak AD-H, hexane/*i*-PrOH = 95:5, flow rate 1.00 mL/min,  $\lambda = 220$  nm, rt):  $t_{\text{R}}$  (major) = 9.3 min,  $t_{\text{R}}$  (minor) = 11.1 min.

**(2S,3S,4S,5S)-3-((*tert*-Butyldimethylsilyl)oxy)-5-nitro-4-phenyltetrahydro-2H-pyran-2-ol (19)**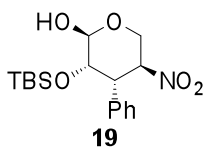

To a solution of chiral aldehyde **4a** (58 mg, 0.18 mmol) in  $\text{CH}_2\text{Cl}_2$  (0.2 mL) was added 37% aqueous formaldehyde (9.9  $\mu$ L, 0.358 mmol), and then triethylamine (13.9  $\mu$ L, 0.1 mmol) was added to the mixture. After 1 h at rt, 37% aqueous formaldehyde (15  $\mu$ L, 0.537 mmol) was further added. The reaction mixture was stirred for further 3 h at rt. To the mixture was added sat  $\text{NH}_4\text{Cl}$  aq. at rt. The mixture was extracted three times with AcOEt. The combined organic layers were dried over  $\text{Na}_2\text{SO}_4$ , concentrated, and purified by flash column chromatography to afford **19** as a colorless oil (21.4 mg, 0.0605 mmol, yield 34%).  $^1\text{H}$  NMR (400 MHz,  $\text{CDCl}_3$ )  $\delta$  7.31 – 7.28 (m, 5H), 5.50 (dt,  $J = 5.0, 11.4$

Hz, 1H), 5.09 (brs, 1H), 4.35 (t,  $J = 10.5$  Hz, 1H), 4.17 (d,  $J = 4.7$  Hz, 1H), 4.15 (brs, 1H), 2.73 (brs, 1H), 0.83 (s, 9H), -0.22 (s, 3H), -0.57 (s, 3H);  $^{13}\text{C}$  NMR (100 MHz,  $\text{CDCl}_3$ )  $\delta$  136.49, 128.72, 128.64, 127.86, 94.04, 81.12, 72.61, 61.53, 44.74, 25.91, 18.11, -5.33, -5.77; HRMS ( $m/z$ ):  $[\text{M}+\text{H}]^+$  calcd for  $\text{C}_{17}\text{H}_{28}\text{NO}_5\text{Si}^+$  376.1551, found 376.1555. Enantiomeric excess: 97%, determined by HPLC after reduction to corresponding alcohol (Chiralpak AD-H, hexane/*i*-PrOH = 95:5, flow rate 1.00 mL/min,  $\lambda = 220$  nm, rt):  $t_{\text{R}}$  (major) = 21.7 min,  $t_{\text{R}}$  (minor) = 15.5 min.

**Tandem *syn*-Michael–Henry reaction: (3*R*,4*S*,5*R*,6*R*)-3-Isopropyl-5-nitro-6-(4-nitrophenyl)-4-phenyltetrahydro-2*H*-pyran-2-ol (**24**)**

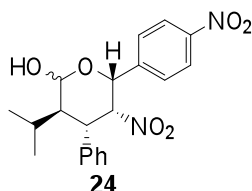

Isovaleraldehyde **20** (64  $\mu\text{L}$ , 0.6 mmol) was added to a solution of diphenylprolinol TMS ether **21** (6.5 mg, 20  $\mu\text{mol}$ ) and  $\beta$ -nitrostyrene **2a** (29.8 mg, 0.2 mmol) in  $\text{CH}_2\text{Cl}_2$  (0.2 mL). The resulting solution was stirred at rt for 18 h, and then 4-nitrobenzaldehyde (90.7 mg, 0.6 mmol) and triethylamine (13.9  $\mu\text{L}$ , 0.1 mmol) were added. After 4 h at rt, the reaction mixture was directly subjected to flash column chromatography to afford (3*R*,4*S*,5*R*,6*R*)-3-isopropyl-5-nitro-6-(4-nitrophenyl)-4-phenyltetrahydro-2*H*-pyran-2-ol **24** as a white solid (59.5 mg, 154  $\mu\text{mol}$ , yield 77%). Anomeric mixture (4:1) in  $\text{CDCl}_3$ ;  $^1\text{H}$  NMR (500 MHz,  $\text{CDCl}_3$ )  $\delta$  8.15 – 8.10 (m, 2H), 7.53 – 7.48 (m, 2H), 7.34 – 7.25 (m, 3H), 7.22 – 7.16 (m, 2H), 5.79 (d,  $J = 2.7$  Hz, 1H), 5.72 (d,  $J = 2.9$  Hz, 1H), 5.01 – 4.95 (m, 1H), 3.82 (dd,  $J = 12.9, 4.5$  Hz, 1H), 3.21 – 3.14 (m, 1H), 3.10 (brs, 1H), 1.84 – 1.77 (m, 1H), 1.04 (d,  $J = 7.1$  Hz, 3H), 0.83 (d,  $J = 7.0$  Hz, 3H);  $^{13}\text{C}$  NMR (100 MHz,  $\text{CDCl}_3$ )  $\delta$  147.87, 143.77, 136.29, 129.28, 128.38, 128.31, 126.98, 123.90, 93.84, 91.56, 68.84, 41.97, 38.72, 26.35, 20.32, 16.92; HRMS ( $m/z$ ):  $[\text{M}+\text{Na}]^+$  calcd for  $\text{C}_{20}\text{H}_{22}\text{N}_2\text{NaO}_6^+$  409.1370, found 409.1369; Enantiomeric excess: 99%, determined by HPLC (Chiralpak AD-H, hexane/*i*-PrOH = 80:20, flow rate 0.80 mL/min,  $\lambda = 220$  nm, rt):  $t_{\text{R}}$  (major) = 27.8 min,  $t_{\text{R}}$  (minor) = 15.1 min.



### 3. Determination of the absolute and relative configurations

The absolute and relative structure of D-talopyranose derivative **12b** was unambiguously determined by X-ray crystallography as shown below. For reference, coupling constants (Hz) and important ROESY crosspeaks of **12b** are depicted. In its chair-like conformation, there was no axial-axial orientation of *gem*-protons, which resulted in relatively small coupling constants.

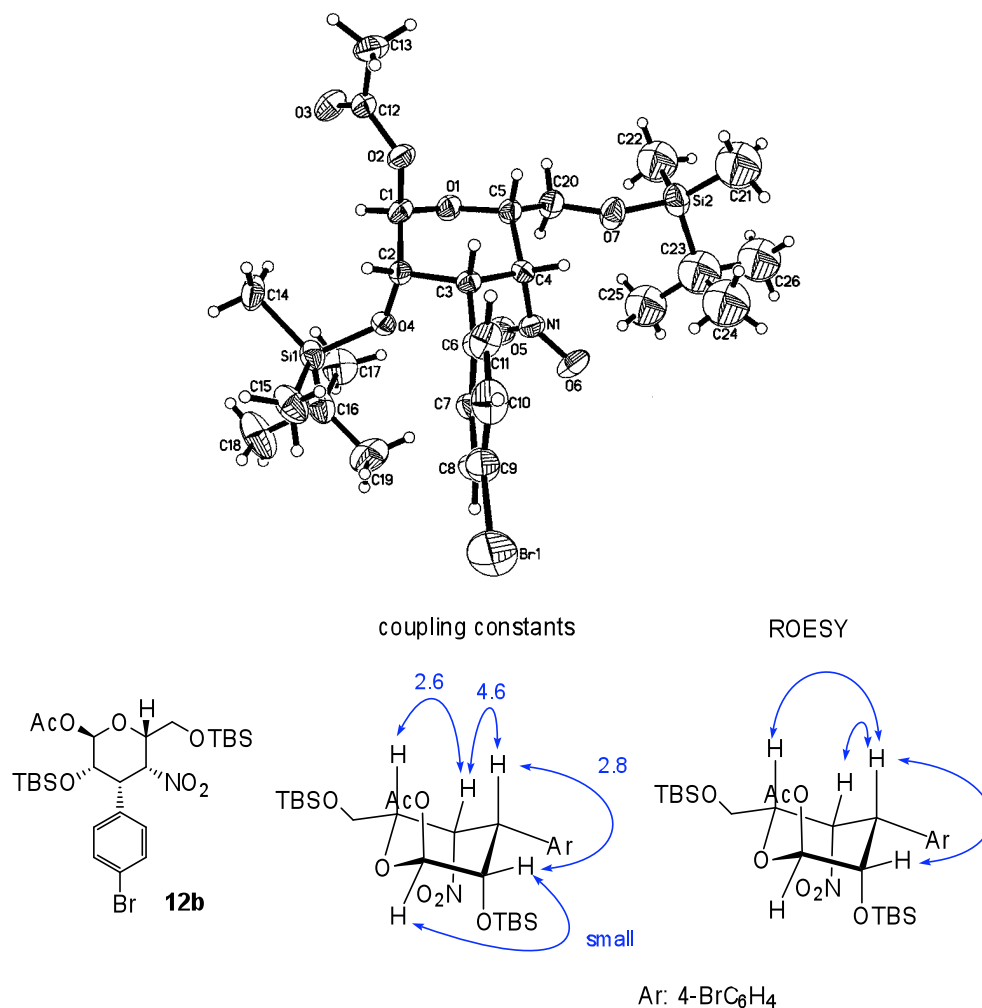

This talo-configuration was completely preserved during the transformation into Boc-protected amine **14**. The sharp signal of NH proton with a large (9.9 Hz) coupling constant implies intramolecular hydrogen bonding between NHBoc and OTBS. This hydrogen bonding decreases ring strain by releasing 1,3-diaxial repulsion between C2 and C4, and the undistorted chair-like conformation results in a "W-shape" long range coupling between H2 and H4.

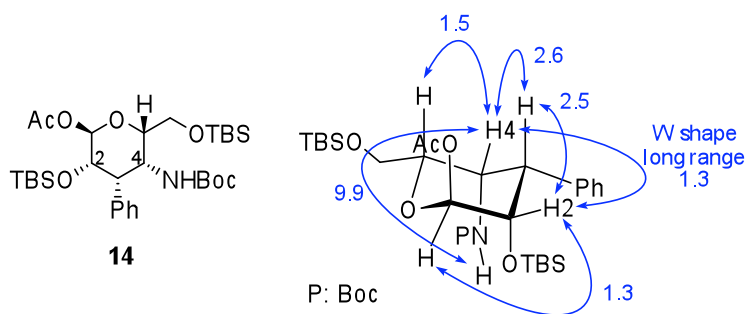

On the other hand, D-mannopyranose derivative **7a**, which has opposite configuration at C4 to talo-type compounds, has large axial-axial coupling constants around H4 with small H1-H2 and H2-H3 coupling constants. These constants provide good support for the structure below.

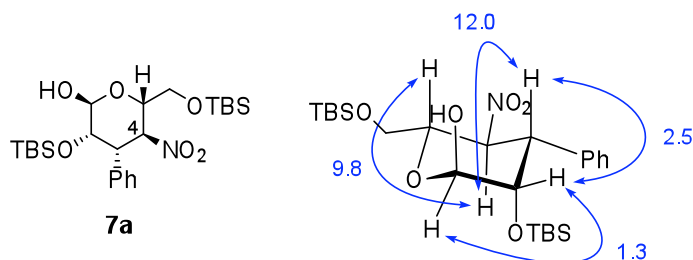

Similar coupling patterns can be observed in **24** produced through *syn*-Michael–Henry tandem process. **24** contains mainly two compounds, which were determined as anomeric diastereomers (**24 $\alpha$** : **24 $\beta$**  = ~4 : 1).

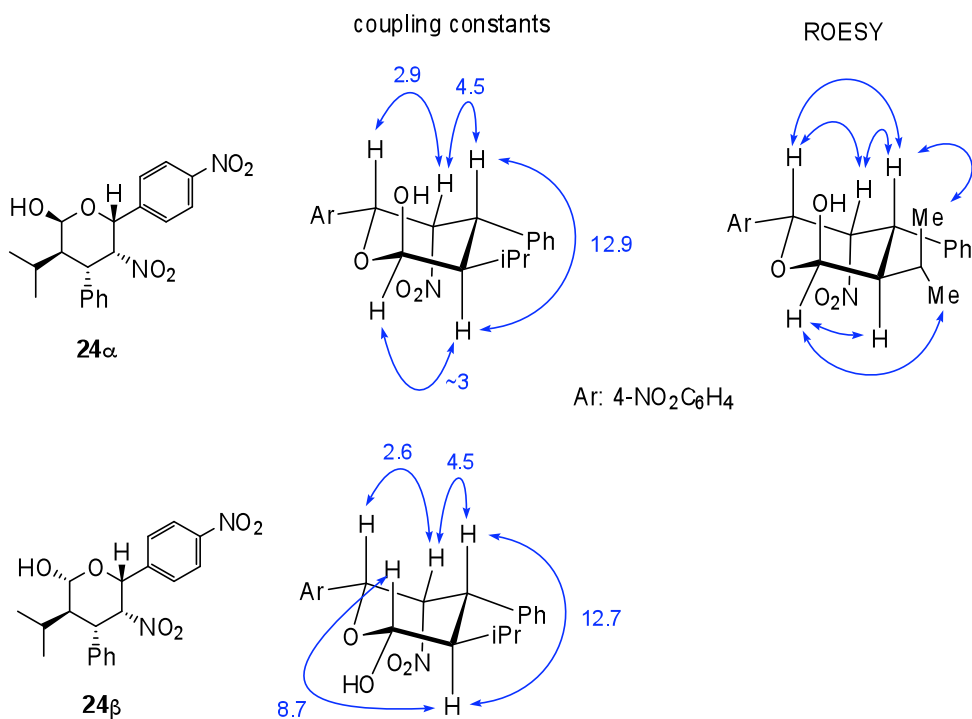

#### 4. Reference

- S1. Xue F, Zhang S, Duan W, Wang W (2008) A Novel Bifunctional Sulfonamide Primary Amine-Catalyzed Enantioselective Conjugate Addition of Ketones to Nitroolefins *Adv. Synth. Catal.* 350:2194-2198.
- S2. Okino T, Hoashi Y, Takemoto Y (2003) Enantioselective Michael Reaction of Malonates to Nitroolefins Catalyzed by Bifunctional Organocatalysts *J. Am. Chem. Soc.* 125:12672-12673.
- S3. Gawronski J, Kwit M, Skowronek P (2009) Thiourea and isothiocyanate – two useful chromophores for stereochemical studies. A comparison of experiment and computation. *Org. Biomol. Chem.* 7:1562-1572.

## 5. HPLC traces

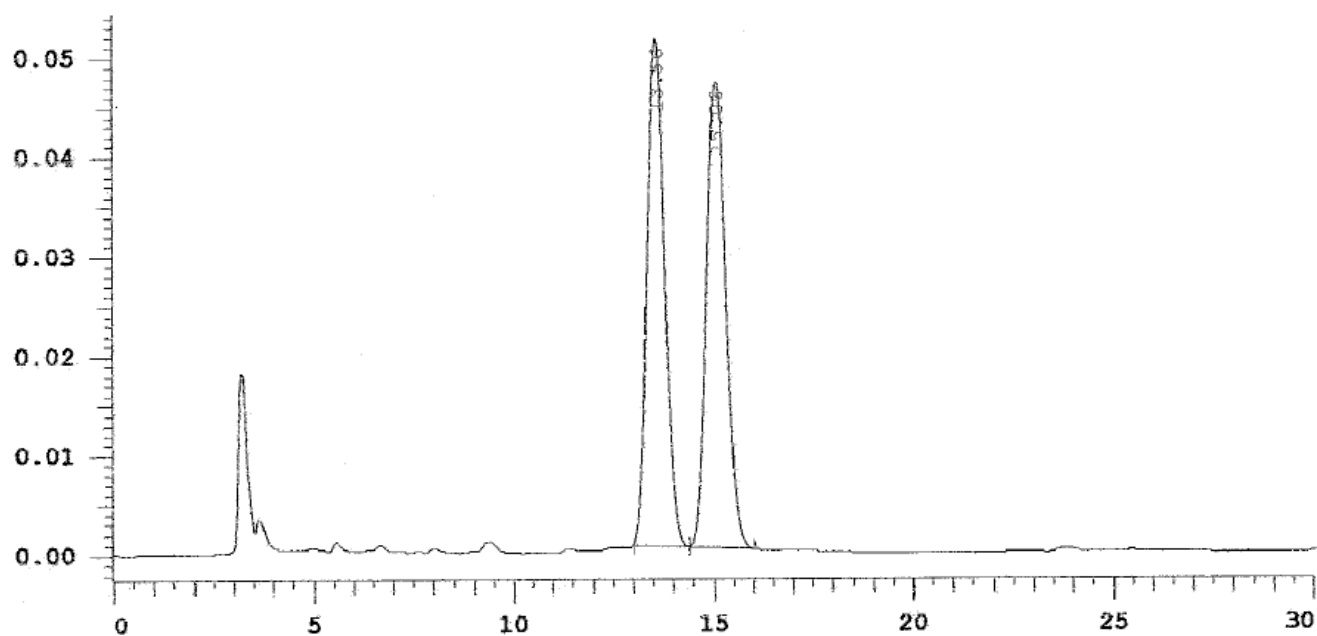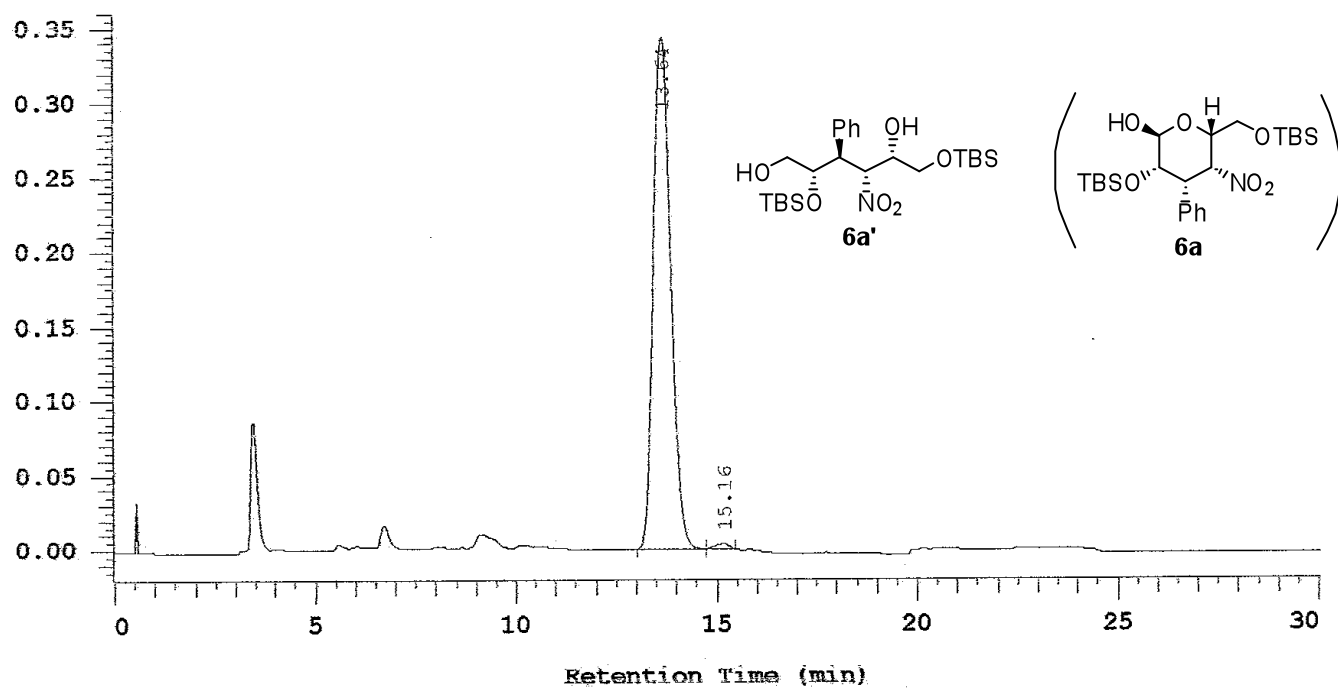

| No. | RT    | Height | Area    | Conc 1  | BC |
|-----|-------|--------|---------|---------|----|
| 1   | 13.64 | 171157 | 4840842 | 98.998  | BV |
| 2   | 15.16 | 2327   | 49001   | 1.002   | VB |
|     |       | 173484 | 4889843 | 100.000 |    |

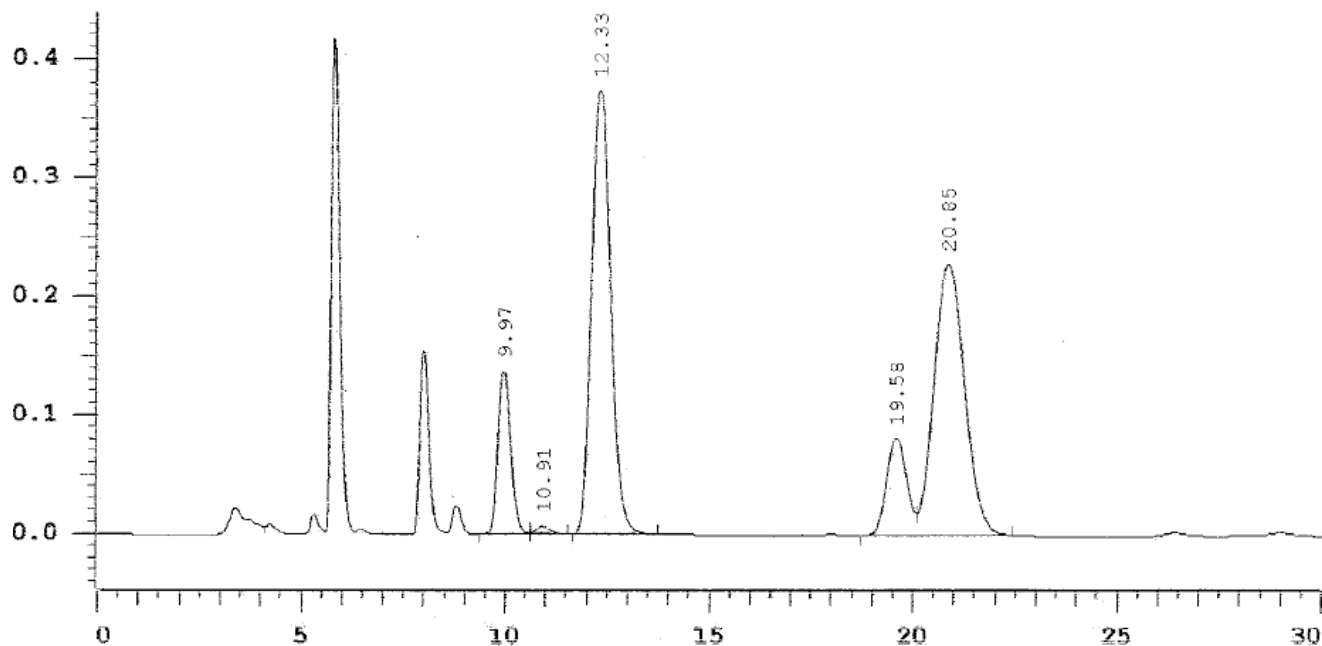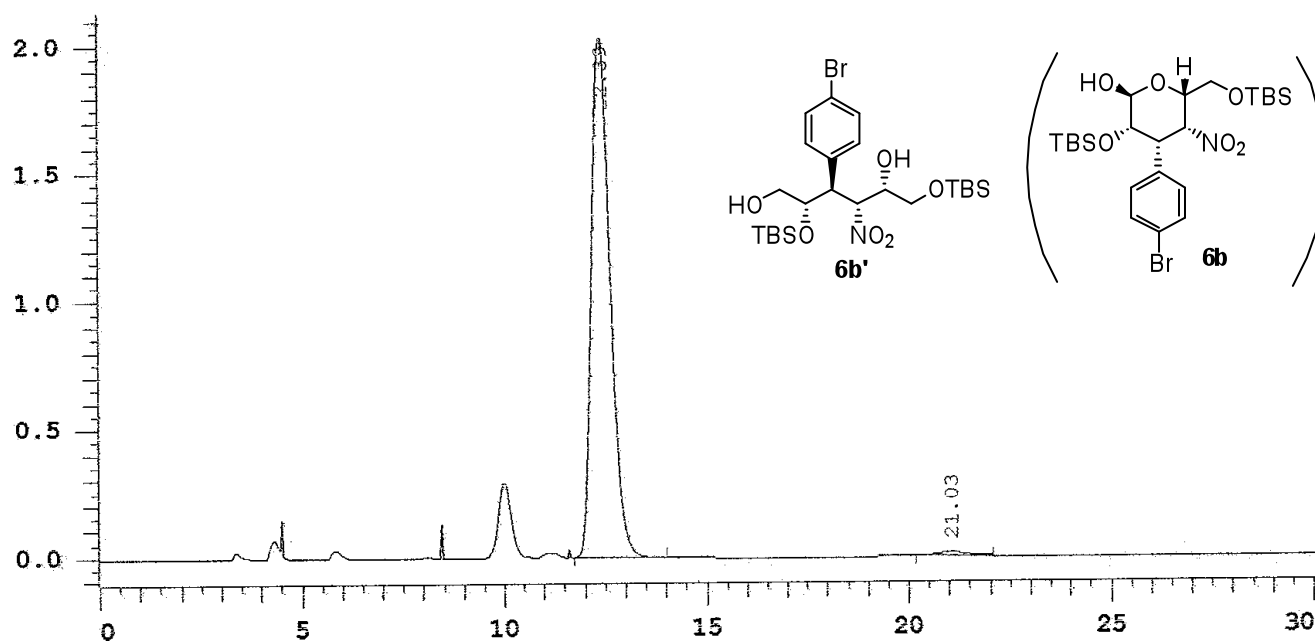

Retention Time (min)

| No. | RT    | Height  | Area     | Conc 1  | BC |
|-----|-------|---------|----------|---------|----|
| 1   | 12.39 | 1015036 | 30931616 | 98.890  | BB |
| 2   | 21.03 | 7273    | 347102   | 1.110   | BB |
|     |       | 1022309 | 31278718 | 100.000 |    |

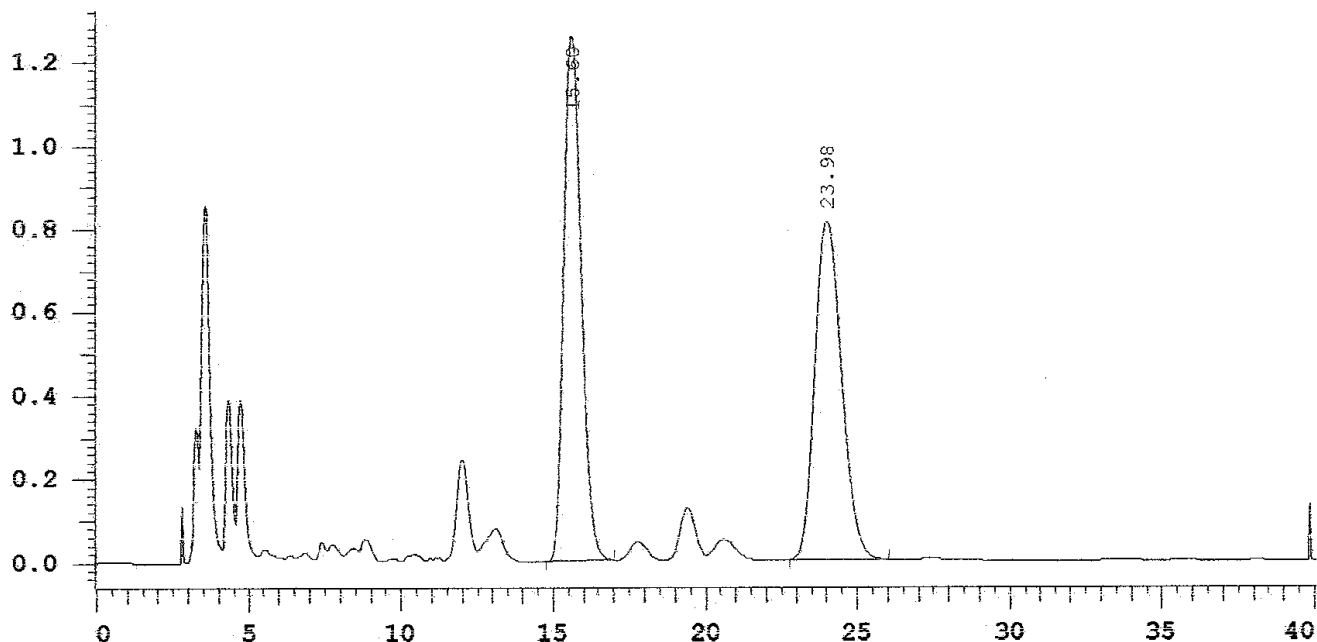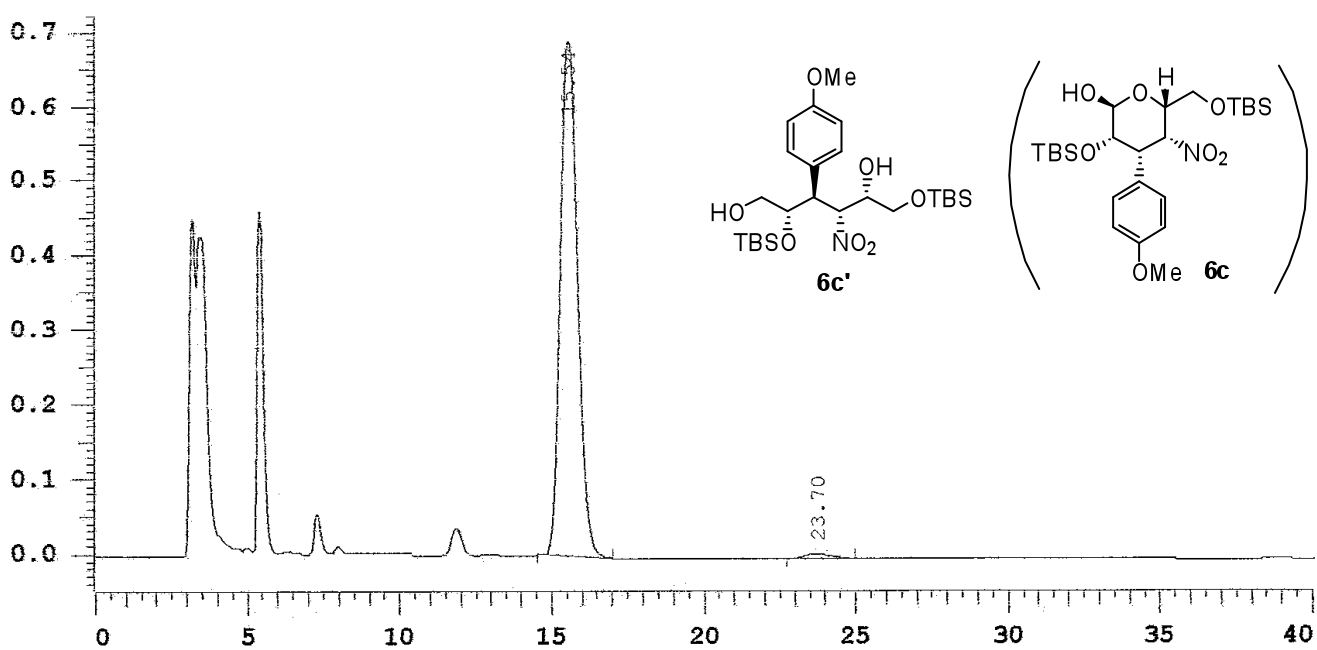

Retention Time (min)

| No. | RT    | Height | Area     | Conc 1  | BC |
|-----|-------|--------|----------|---------|----|
| 1   | 15.54 | 343868 | 12624355 | 98.571  | BB |
| 2   | 23.70 | 3276   | 183011   | 1.429   | BB |
|     |       | 347144 | 12807366 | 100.000 |    |

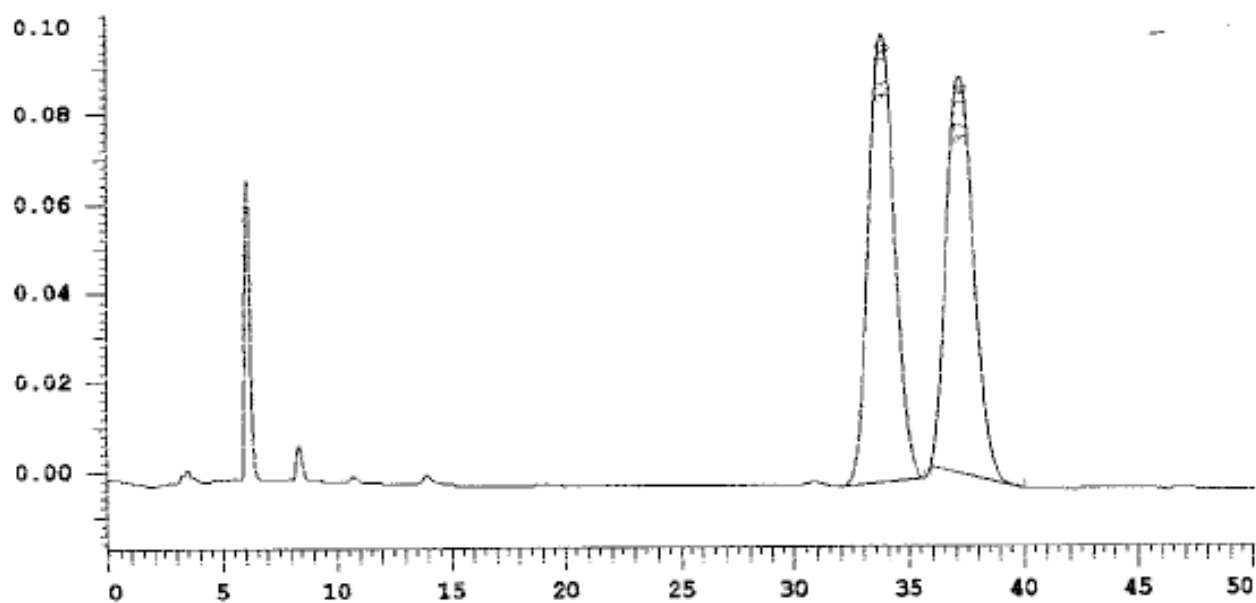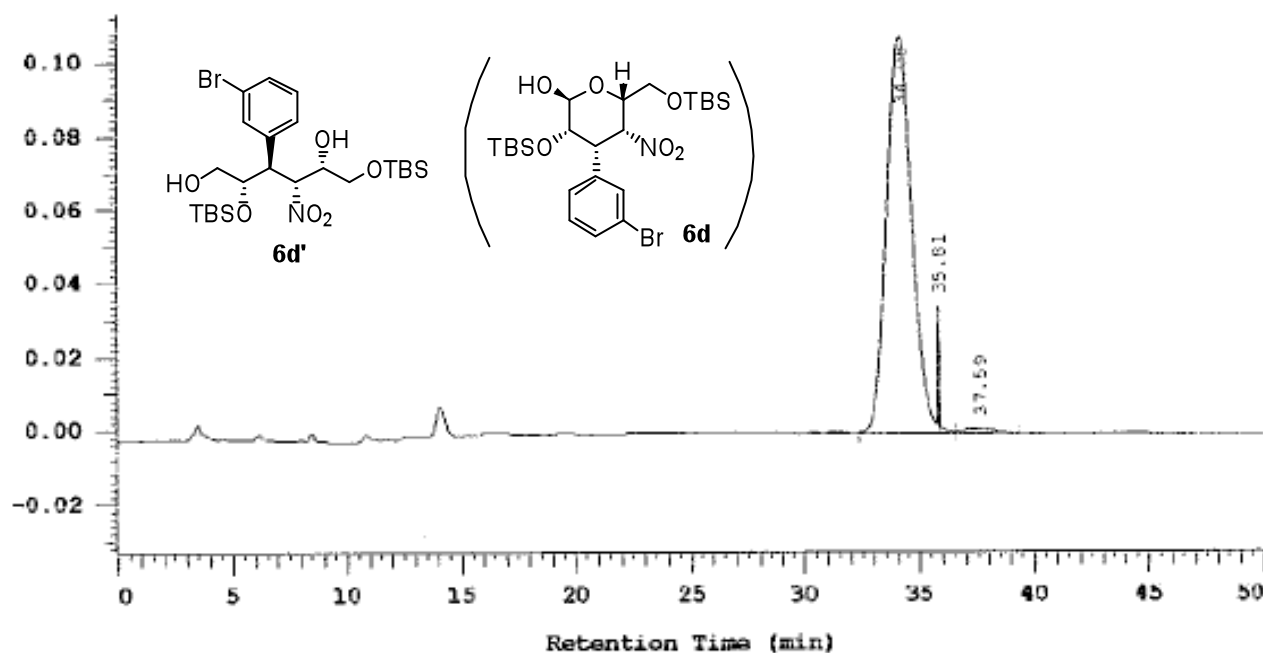

| No. | RT    | Height | Area    | Conc 1  | BC |
|-----|-------|--------|---------|---------|----|
| 1   | 34.05 | 53665  | 3951594 | 97.780  | VV |
| 2   | 35.81 | 17244  | 31331   | 0.775   | VV |
| 3   | 37.59 | 587    | 58383   | 1.445   | VB |
|     |       | 71496  | 4041308 | 100.000 |    |

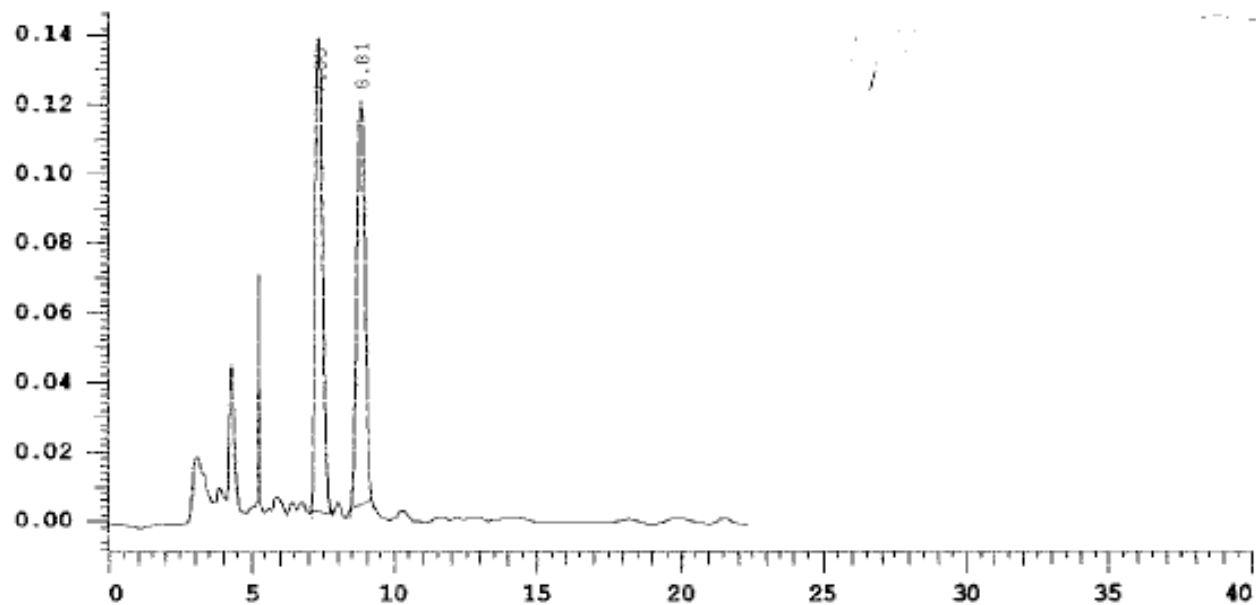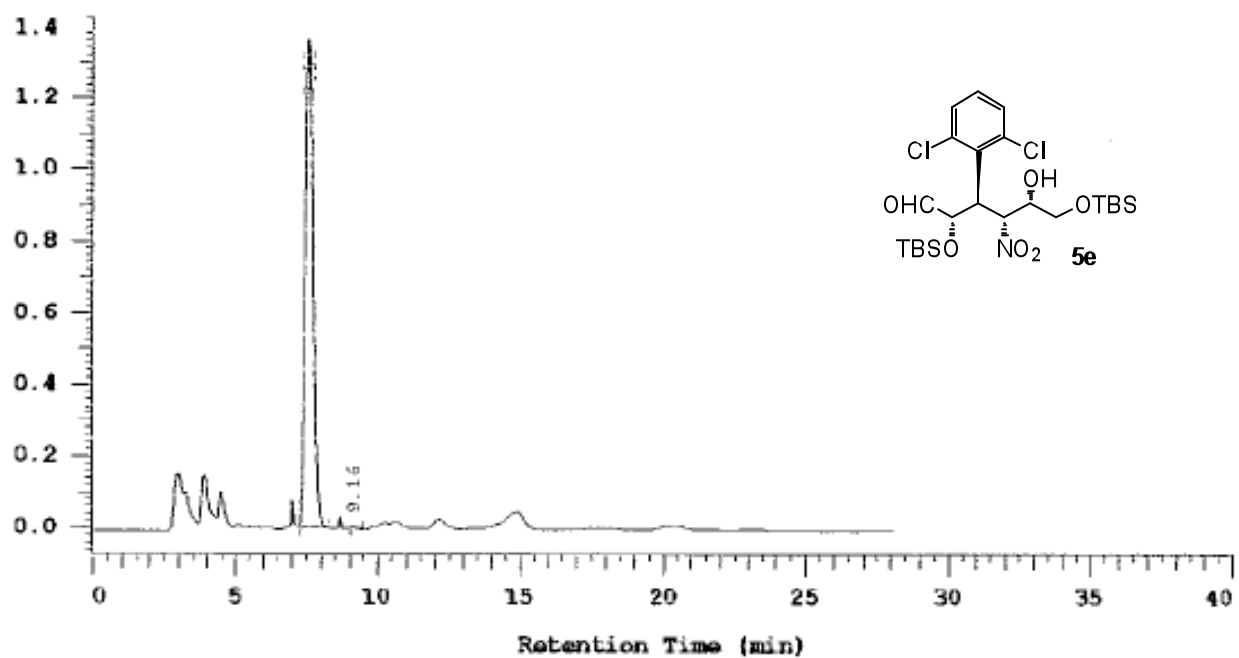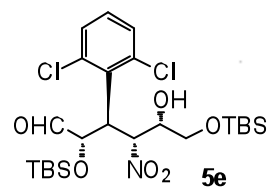

| No. | RT   | Area     | Area %  | Conc 1  | BC |
|-----|------|----------|---------|---------|----|
| 1   | 7.55 | 11236176 | 99.686  | 99.686  | BB |
| 2   | 9.16 | 35342    | 0.314   | 0.314   | BB |
|     |      | 11271518 | 100.000 | 100.000 |    |



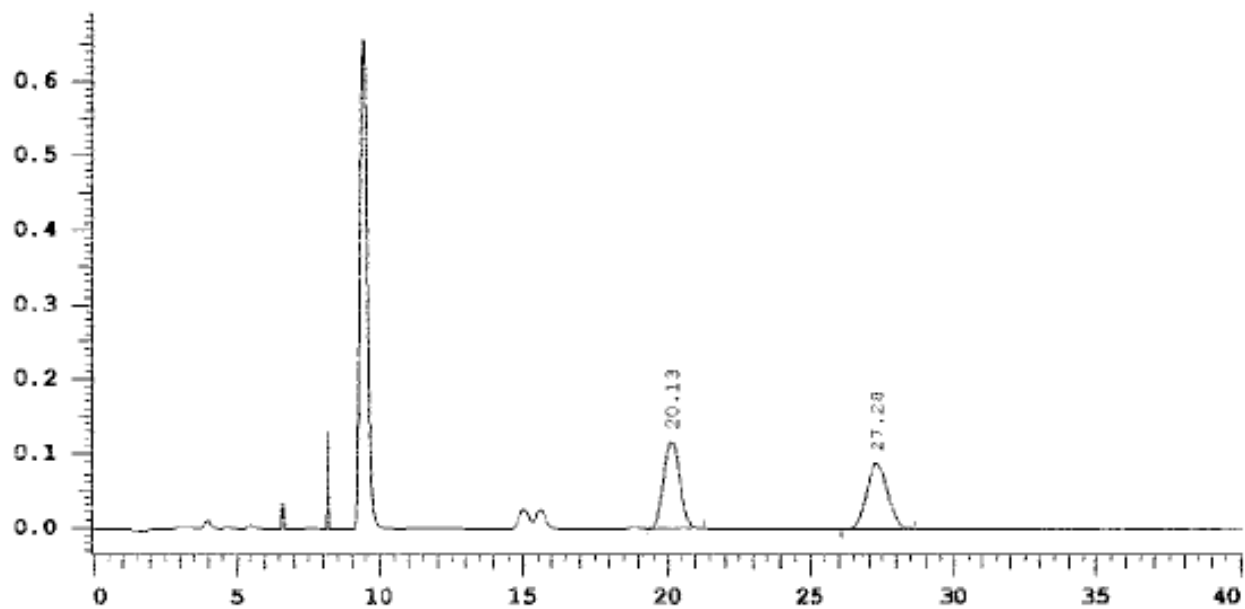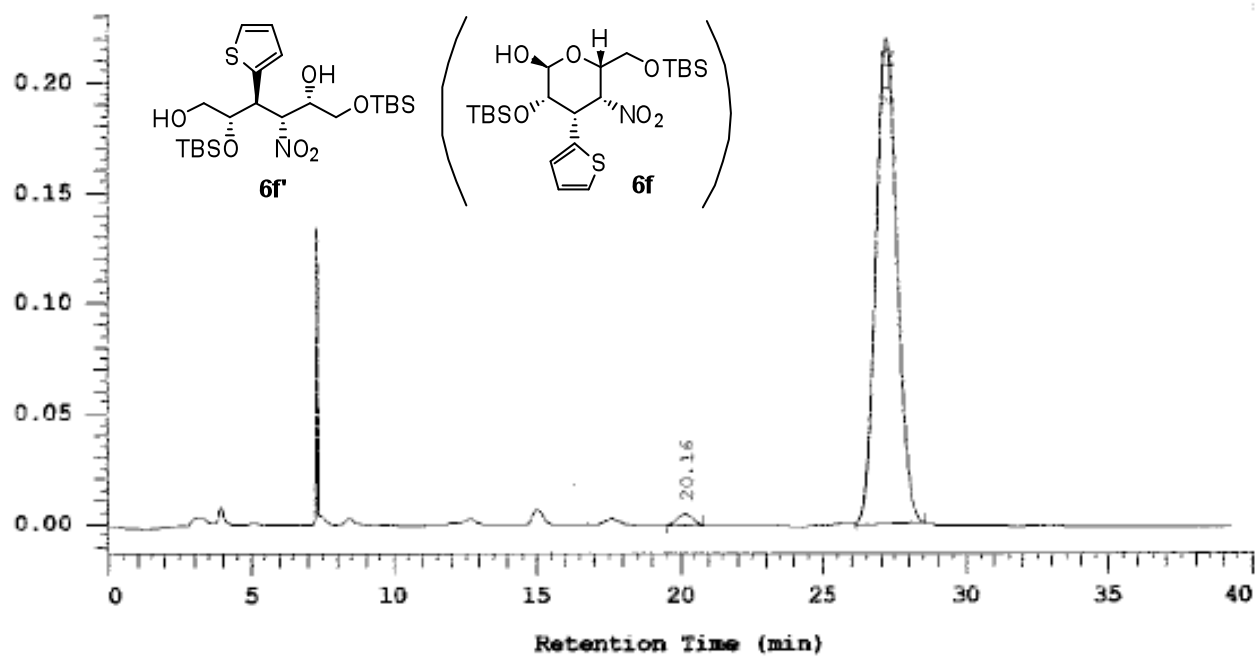

| No. | RT    | Area    | Area %  | Conc 1  | BC |
|-----|-------|---------|---------|---------|----|
| 1   | 20.16 | 85929   | 1.547   | 1.547   | BB |
| 2   | 27.15 | 5467618 | 98.453  | 98.453  | VB |
|     |       | 5553547 | 100.000 | 100.000 |    |

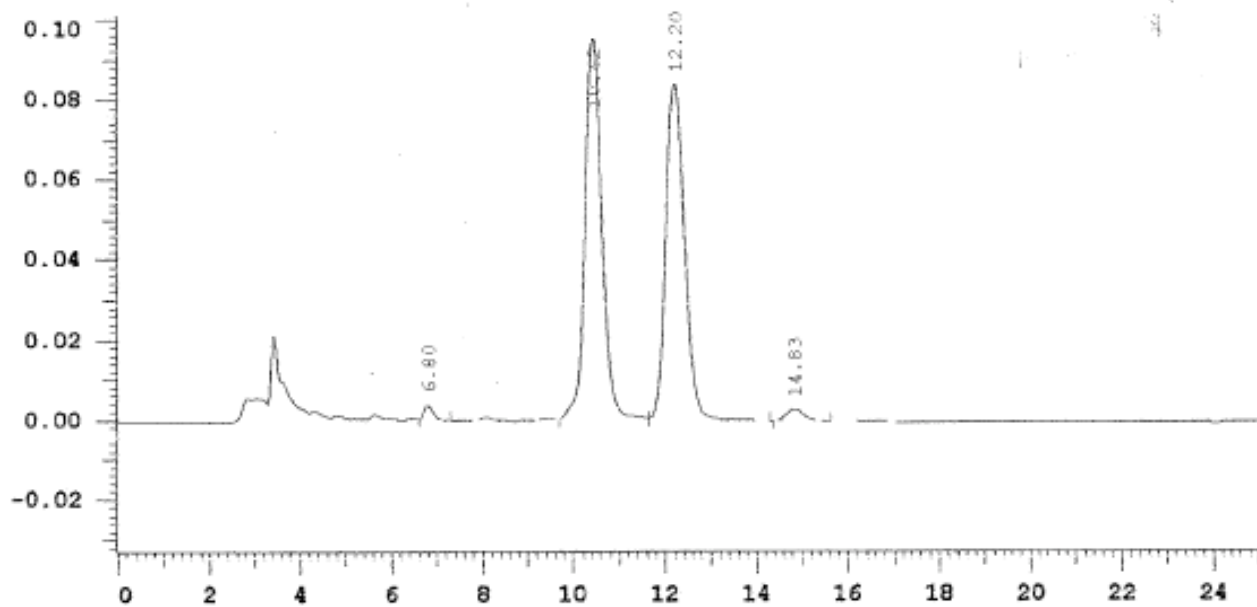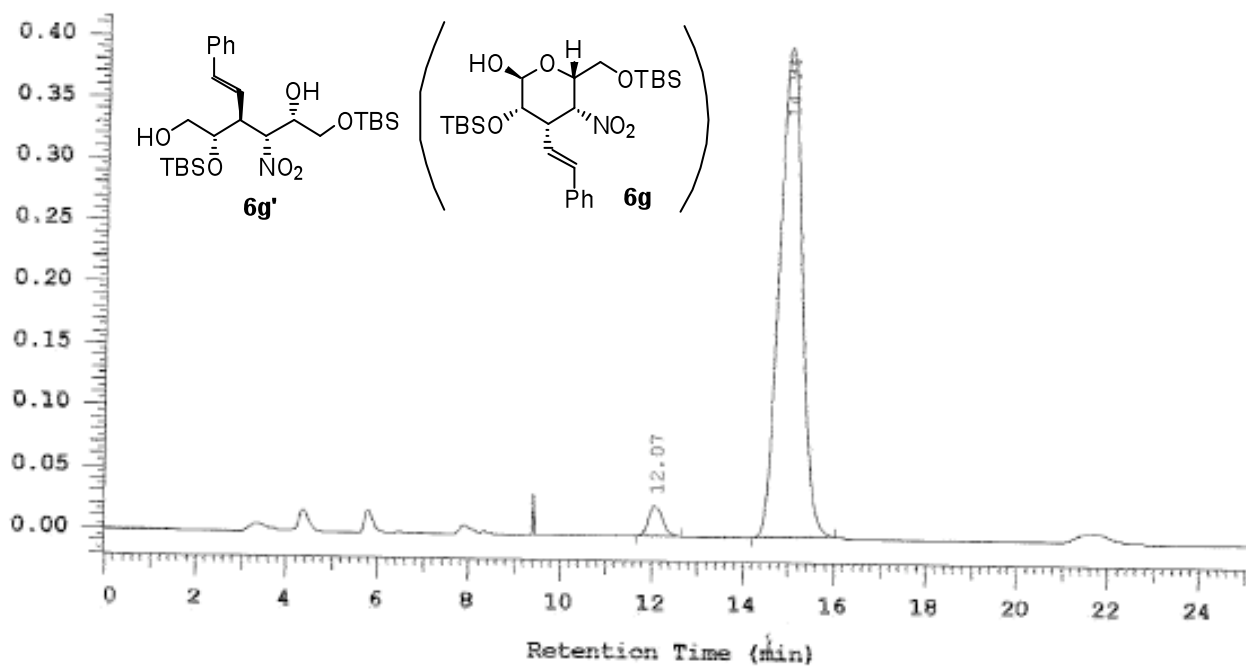

| No. | RT    | Height | Area    | Conc 1  | BC |
|-----|-------|--------|---------|---------|----|
| 1   | 12.07 | 11671  | 237355  | 3.503   | BB |
| 2   | 14.94 | 197779 | 6538372 | 96.497  | BB |
|     |       | 209450 | 6775727 | 100.000 |    |

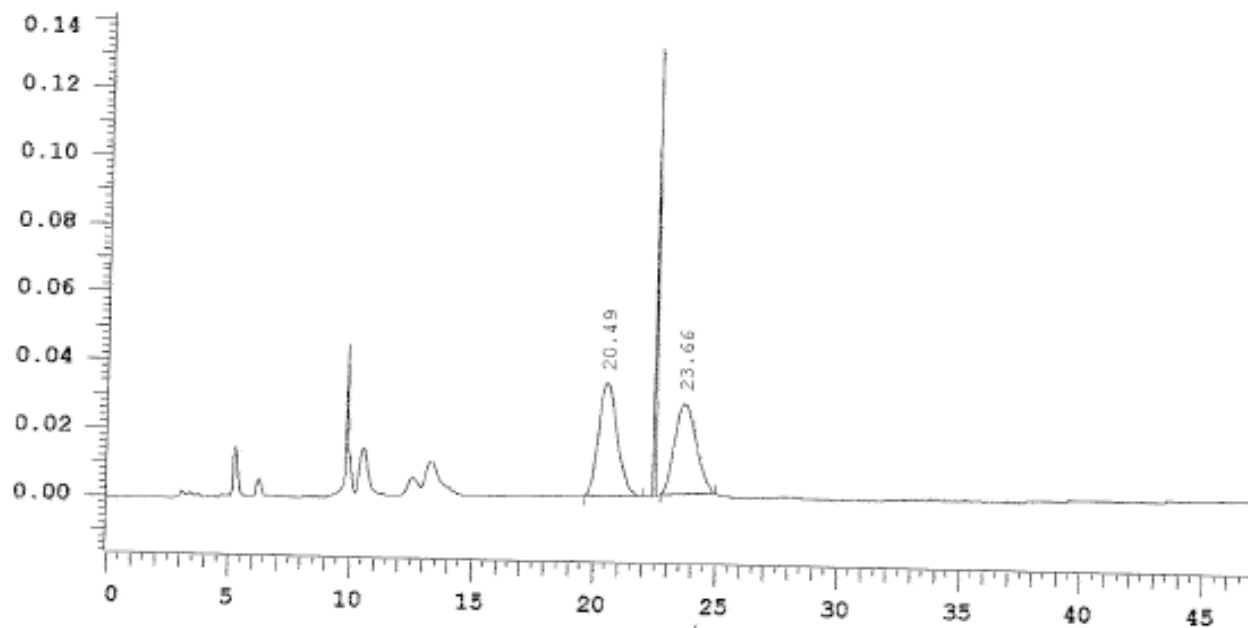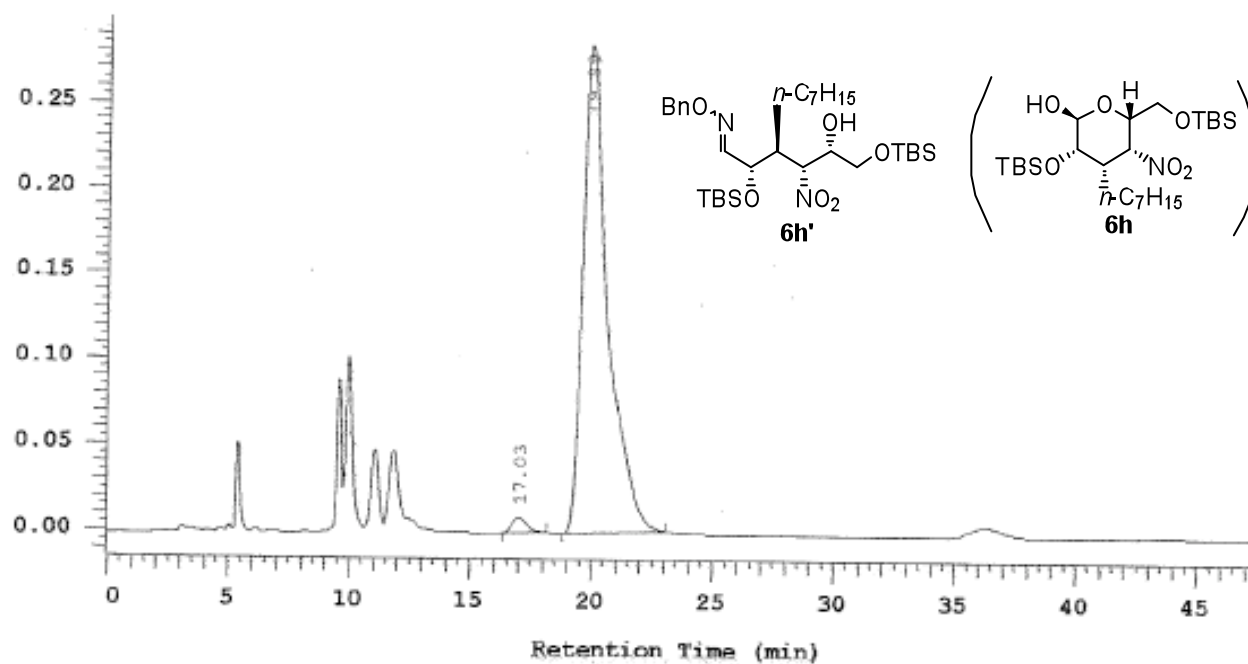

| No. | RT    | Area    | Area %  | Conc 1  | BC |
|-----|-------|---------|---------|---------|----|
| 1   | 17.03 | 180020  | 1.819   | 1.819   | BB |
| 2   | 19.89 | 9716007 | 98.181  | 98.181  | BB |
|     |       | 9896027 | 100.000 | 100.000 |    |

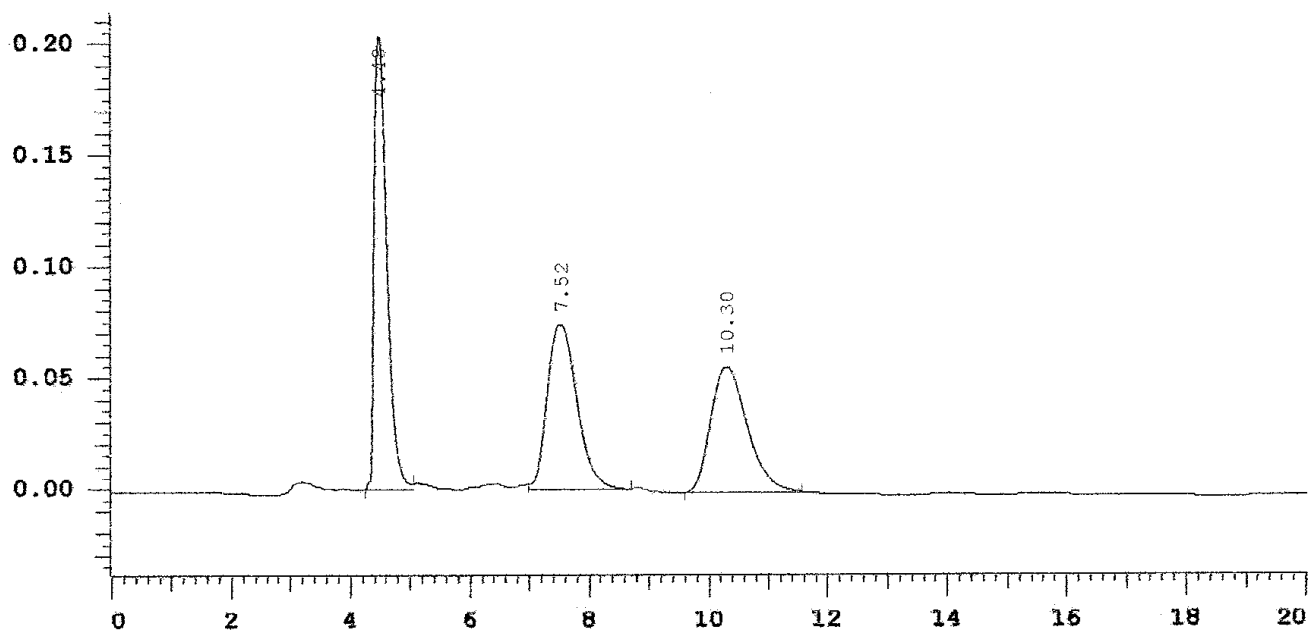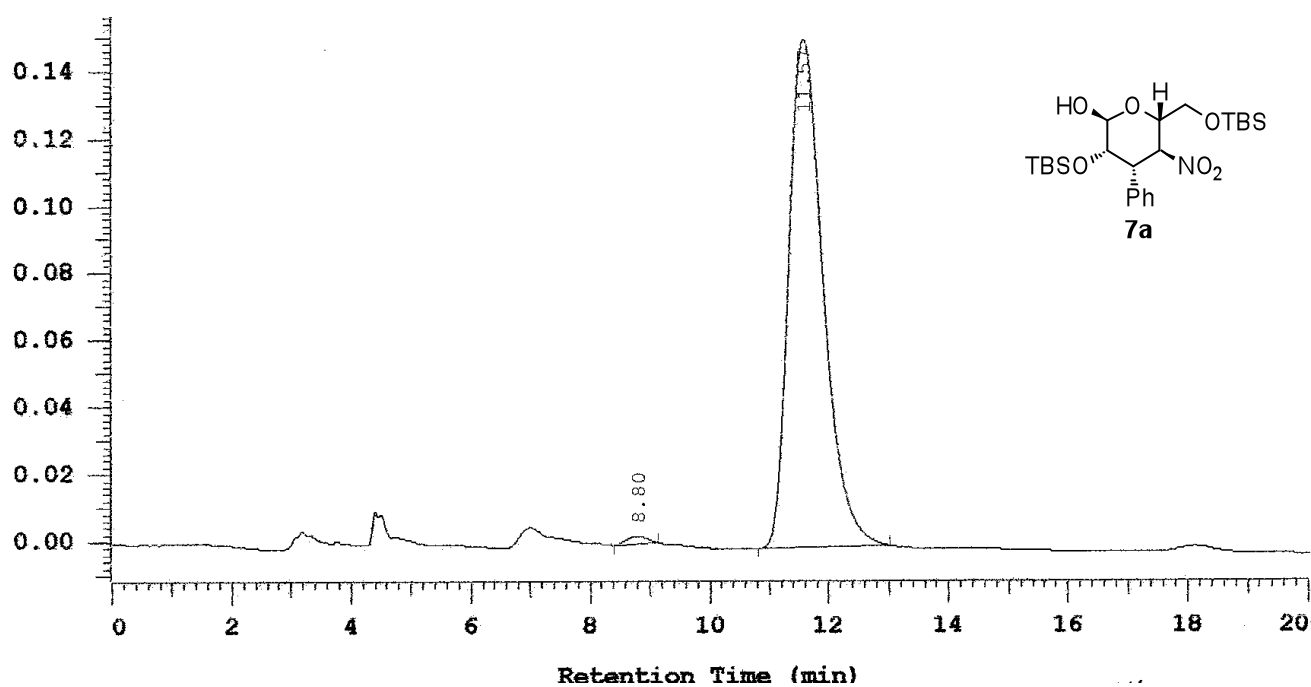

| No. | RT    | Area    | Area %  | Conc 1  | BC |
|-----|-------|---------|---------|---------|----|
| 1   | 8.80  | 26247   | 0.897   | 0.897   | BB |
| 2   | 11.57 | 2898391 | 99.103  | 99.103  | BB |
|     |       | 2924638 | 100.000 | 100.000 |    |

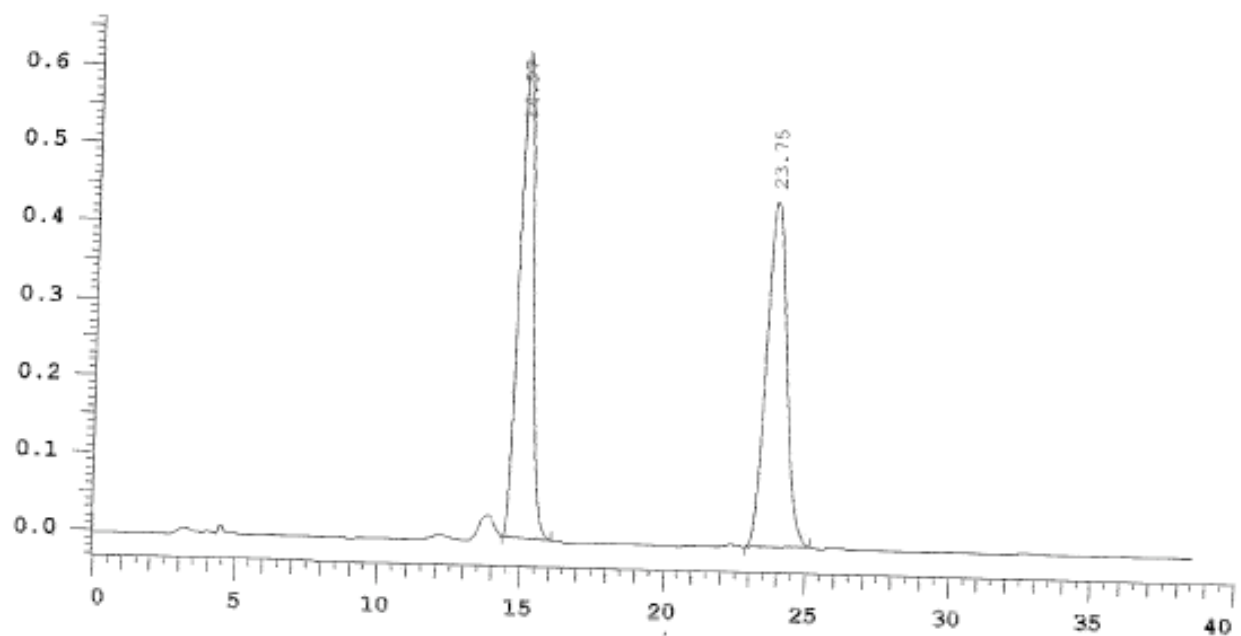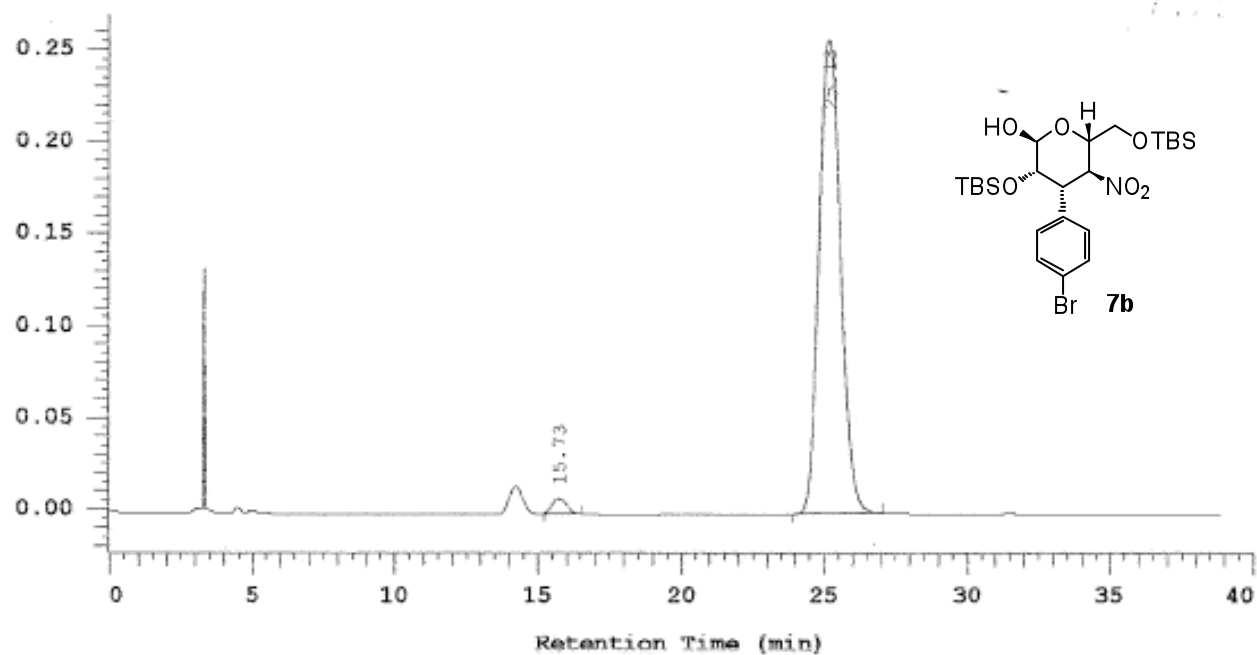

| No. | RT    | Area    | Area %  | Conc 1  | BC |
|-----|-------|---------|---------|---------|----|
| 1   | 15.73 | 134538  | 2.070   | 2.070   | BB |
| 2   | 25.13 | 6365444 | 97.930  | 97.930  | BB |
|     |       | 6499982 | 100.000 | 100.000 |    |

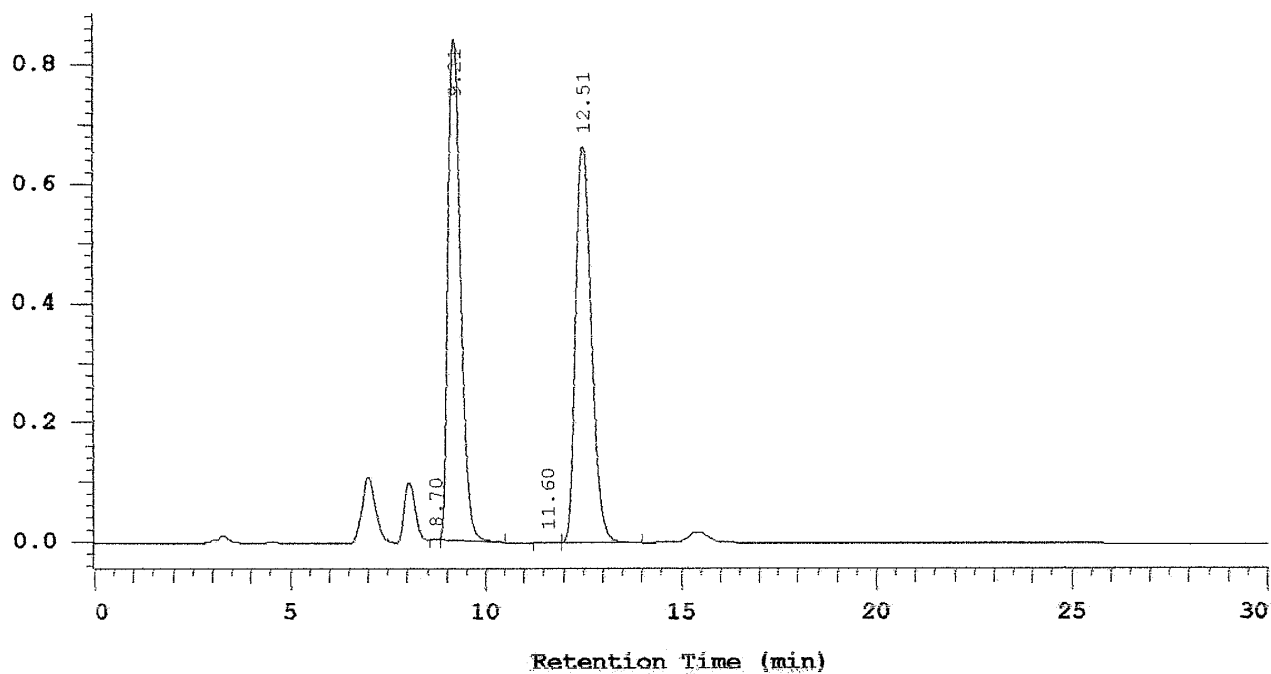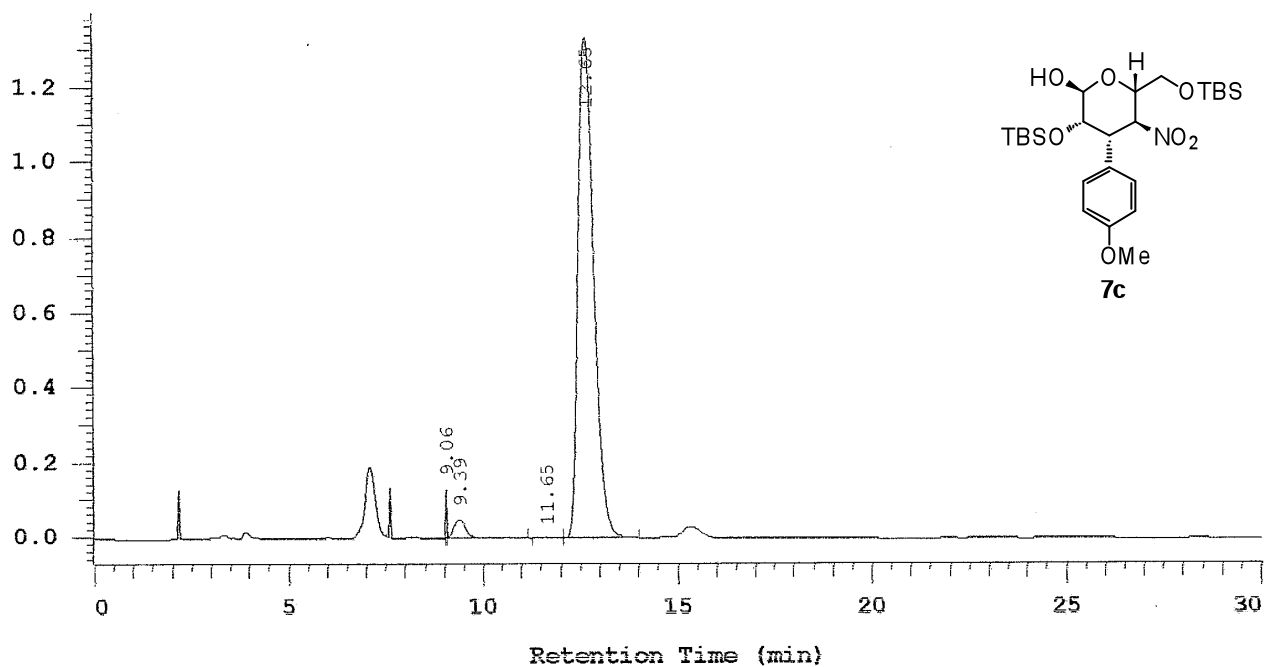

| No. | RT    | Area     | Area %  | Conc 1  | BC  |
|-----|-------|----------|---------|---------|-----|
| 1   | 9.06  | 27432    | 0.153   | 0.153   | BV  |
| 2   | 9.39  | 493888   | 2.749   | 2.749   | TBB |
| 3   | 11.65 | 8640     | 0.048   | 0.048   | BB  |
| 4   | 12.65 | 17435817 | 97.050  | 97.050  | BB  |
|     |       | 17965777 | 100.000 | 100.000 |     |

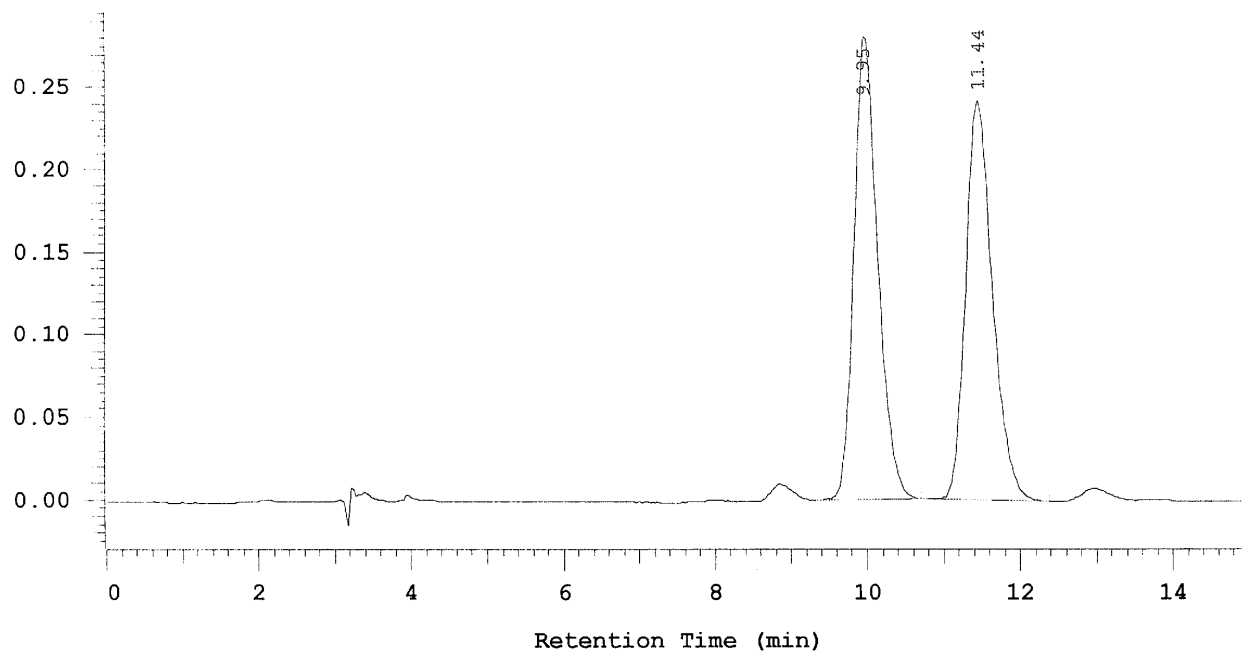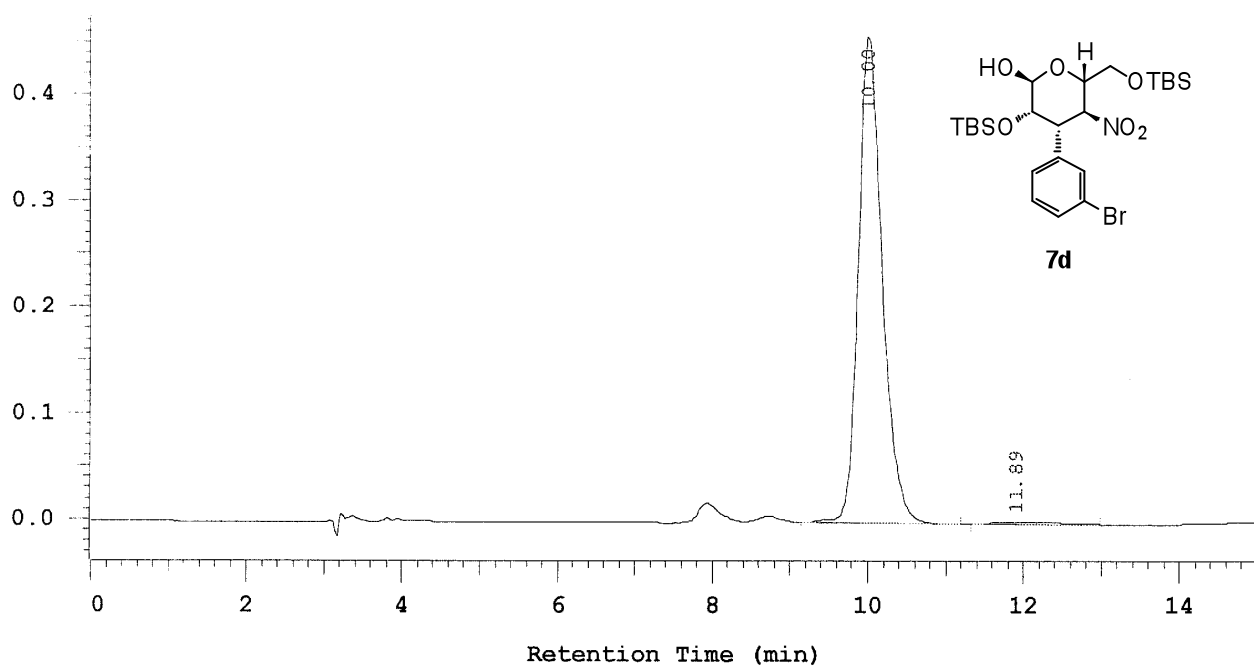

| No. | RT    | Area    | Area %  | Conc 1  | BC |
|-----|-------|---------|---------|---------|----|
| 1   | 10.00 | 4890060 | 98.808  | 98.808  | BB |
| 2   | 11.89 | 59000   | 1.192   | 1.192   | BB |
|     |       | 4949060 | 100.000 | 100.000 |    |

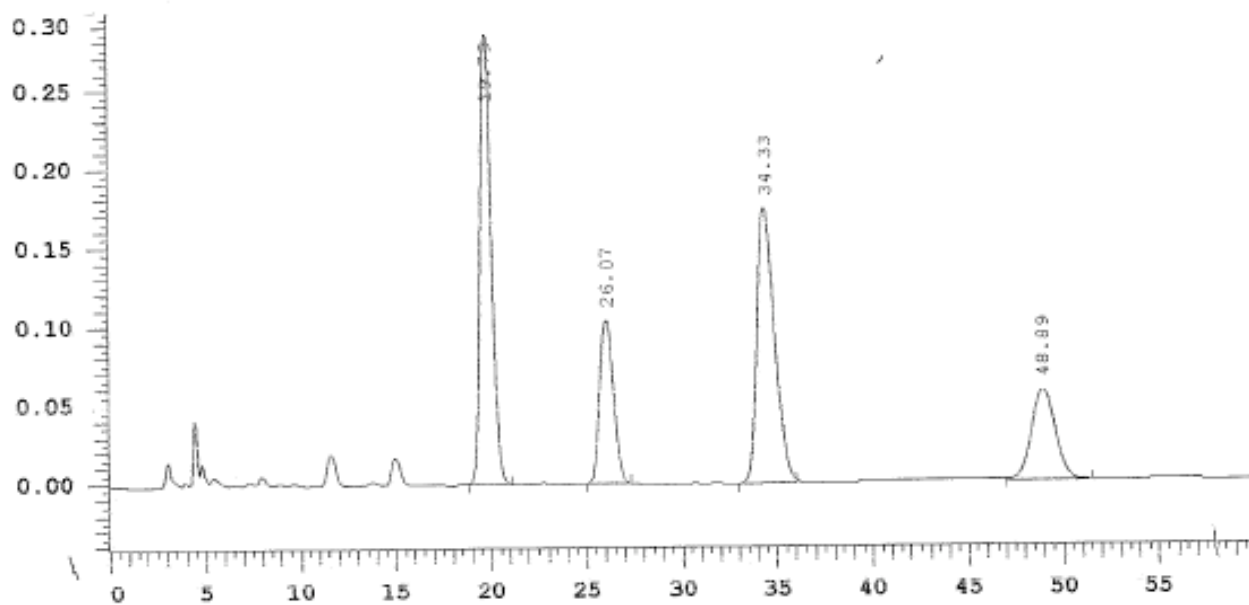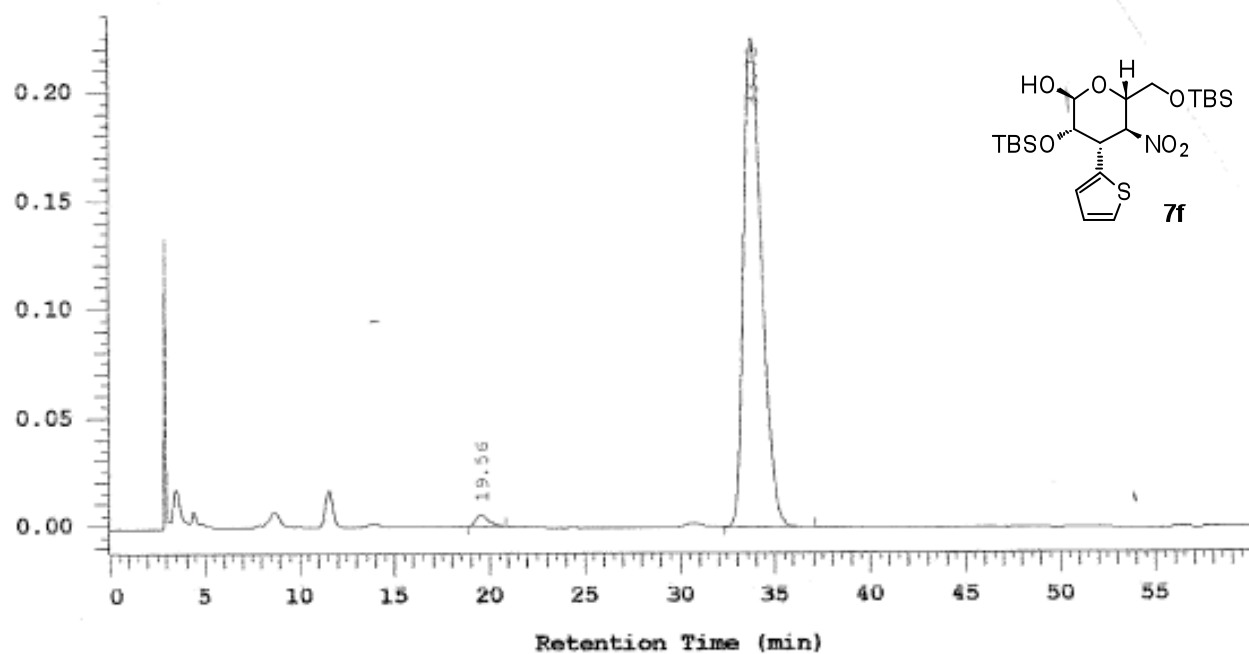

| No. | RT    | Area    | Area %  | Conc 1  | BC |
|-----|-------|---------|---------|---------|----|
| 1   | 19.56 | 133516  | 1.834   | 1.834   | BV |
| 2   | 33.73 | 7147768 | 98.166  | 98.166  | BB |
|     |       | 7281284 | 100.000 | 100.000 |    |



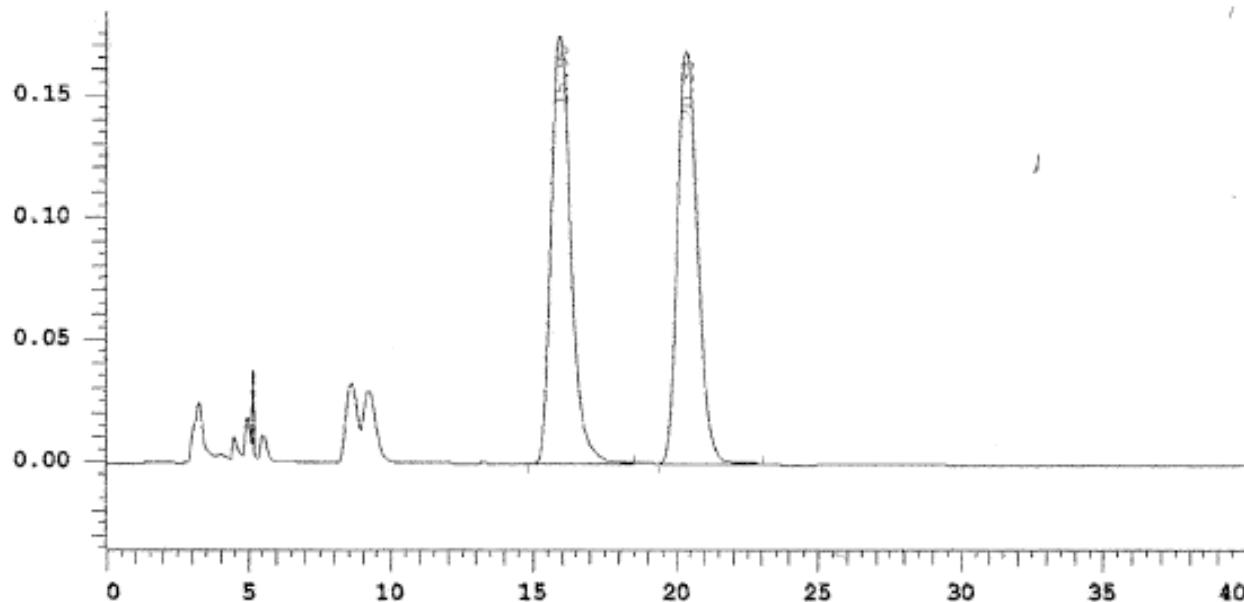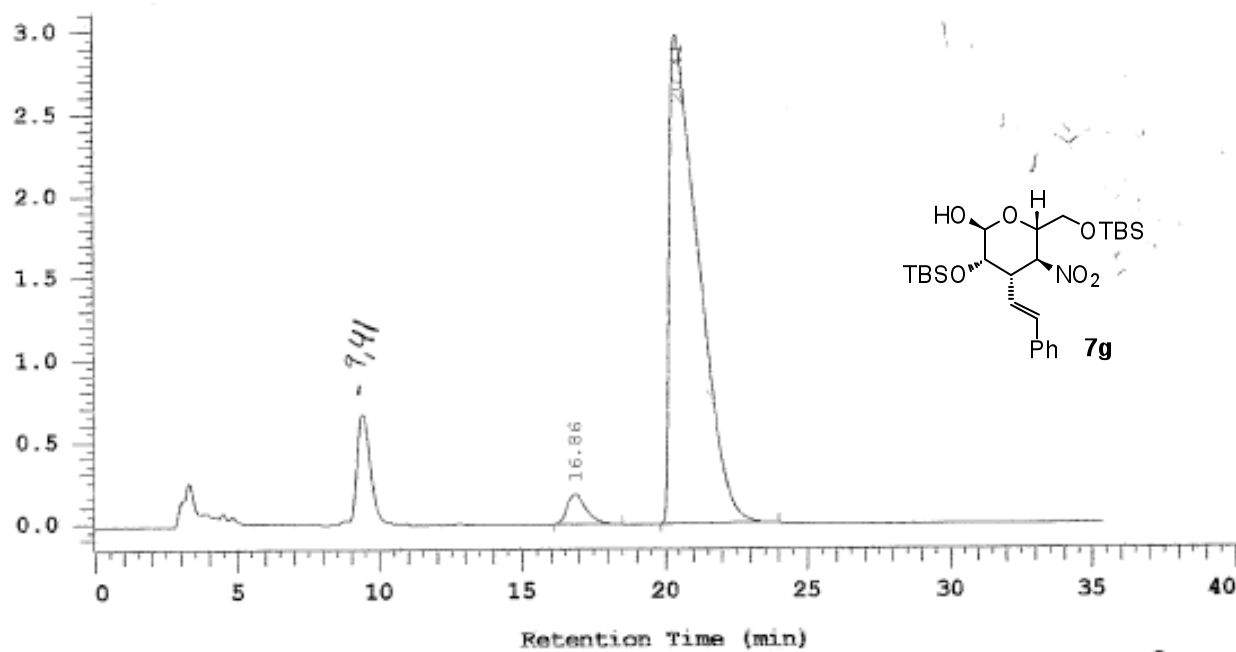

| No. | RT    | Area      | Area %  | Conc 1  | BC |
|-----|-------|-----------|---------|---------|----|
| 1   | 16.86 | 3956663   | 3.718   | 3.718   | BB |
| 2   | 20.41 | 1.024E+08 | 96.282  | 96.282  | BB |
|     |       | 1.064E+08 | 100.000 | 100.000 |    |

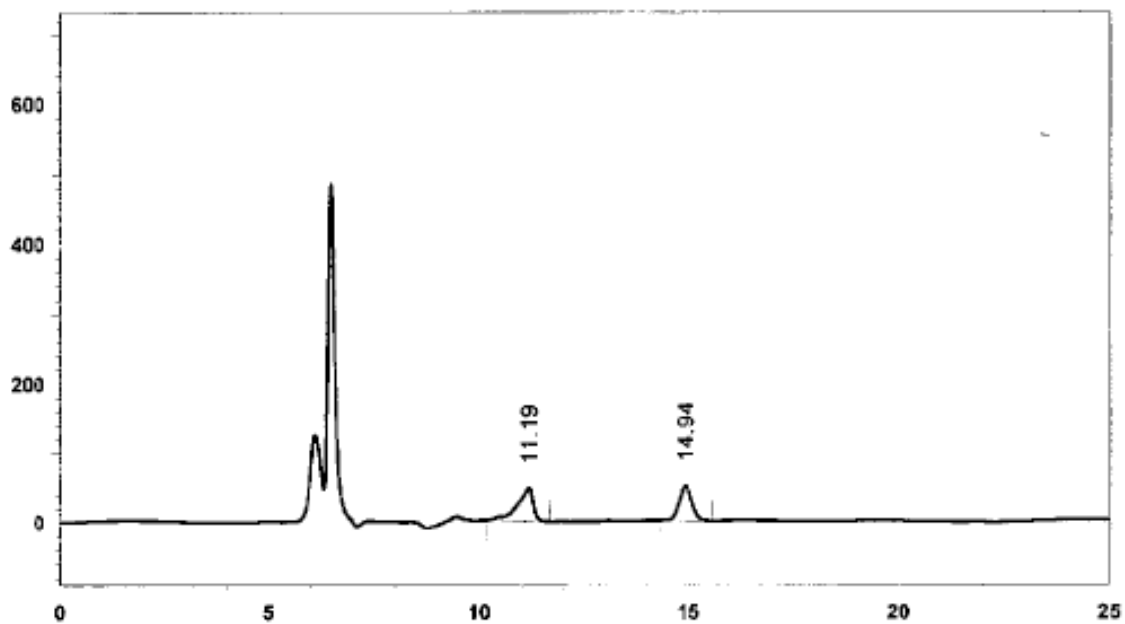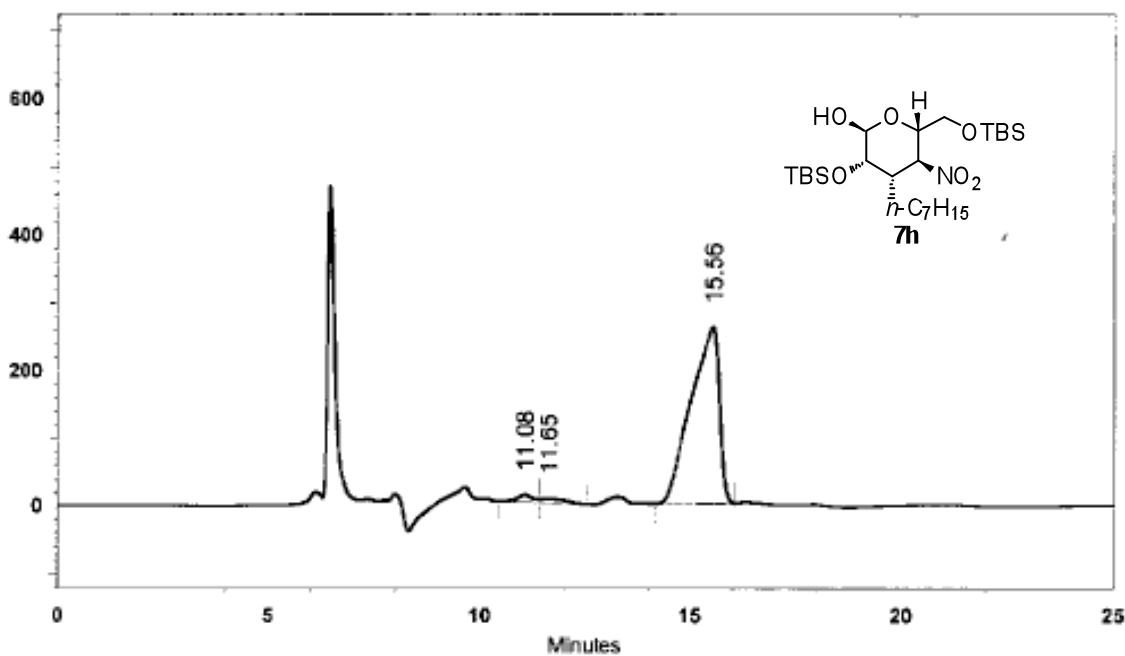

RI Results

| Pk # | RT     | Area     | Area % |
|------|--------|----------|--------|
| 1    | 11.077 | 2214903  | 2.2    |
| 2    | 11.647 | 2021711  | 2.0    |
| 3    | 15.557 | 96503496 | 95.8   |

|        |  |           |       |
|--------|--|-----------|-------|
| Totals |  | 100740110 | 100.0 |
|--------|--|-----------|-------|

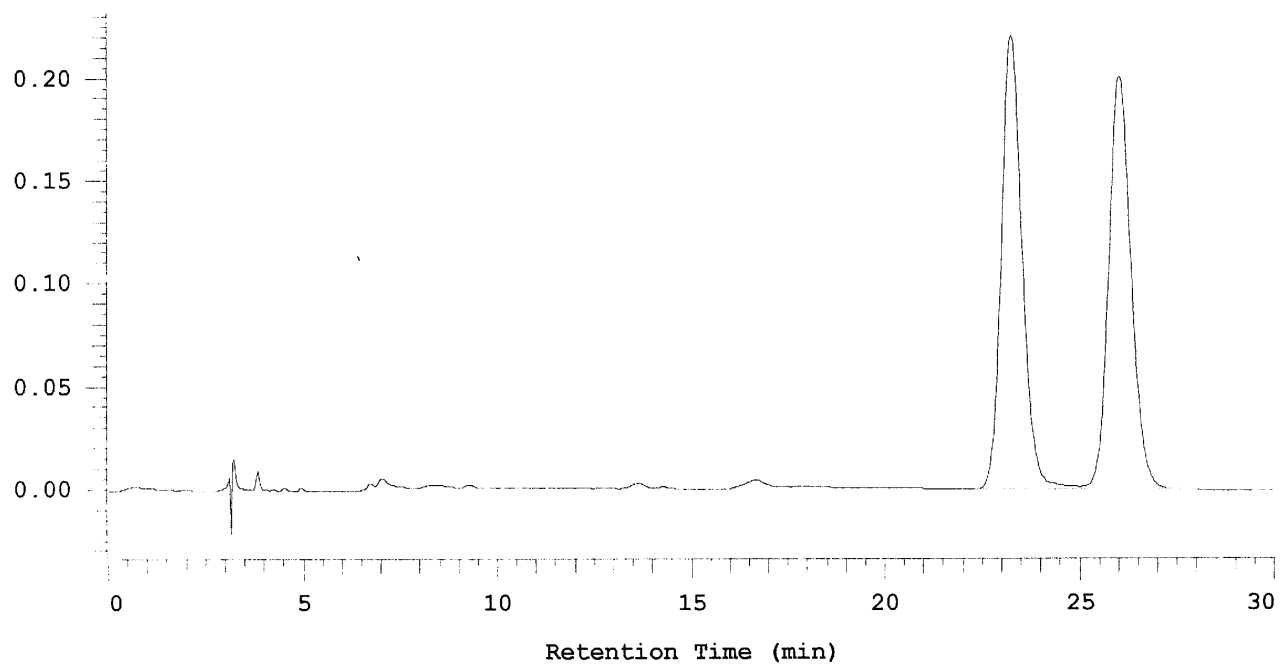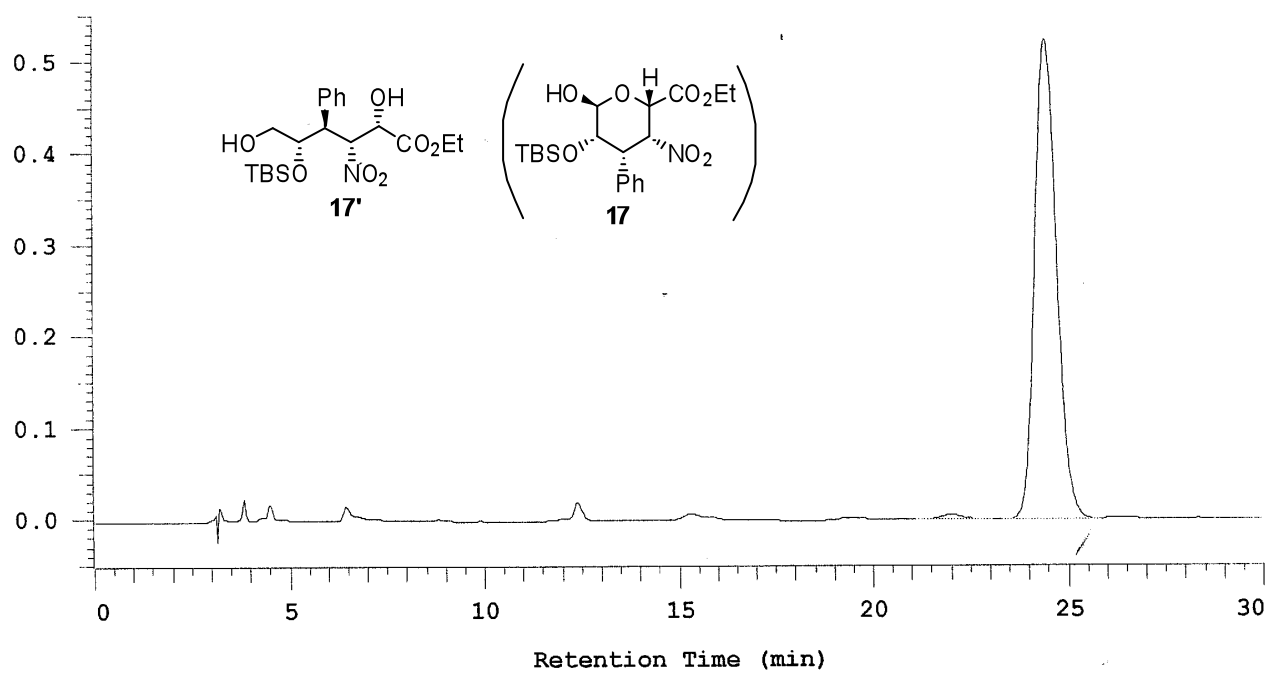

| No. | RT    | Area     | Area %  | Conc 1  | BC |
|-----|-------|----------|---------|---------|----|
| 1   | 22.00 | 103560   | 1.029   | 1.029   | BB |
| 2   | 24.40 | 9956000  | 98.971  | 98.971  | BB |
|     |       | 10059560 | 100.000 | 100.000 |    |

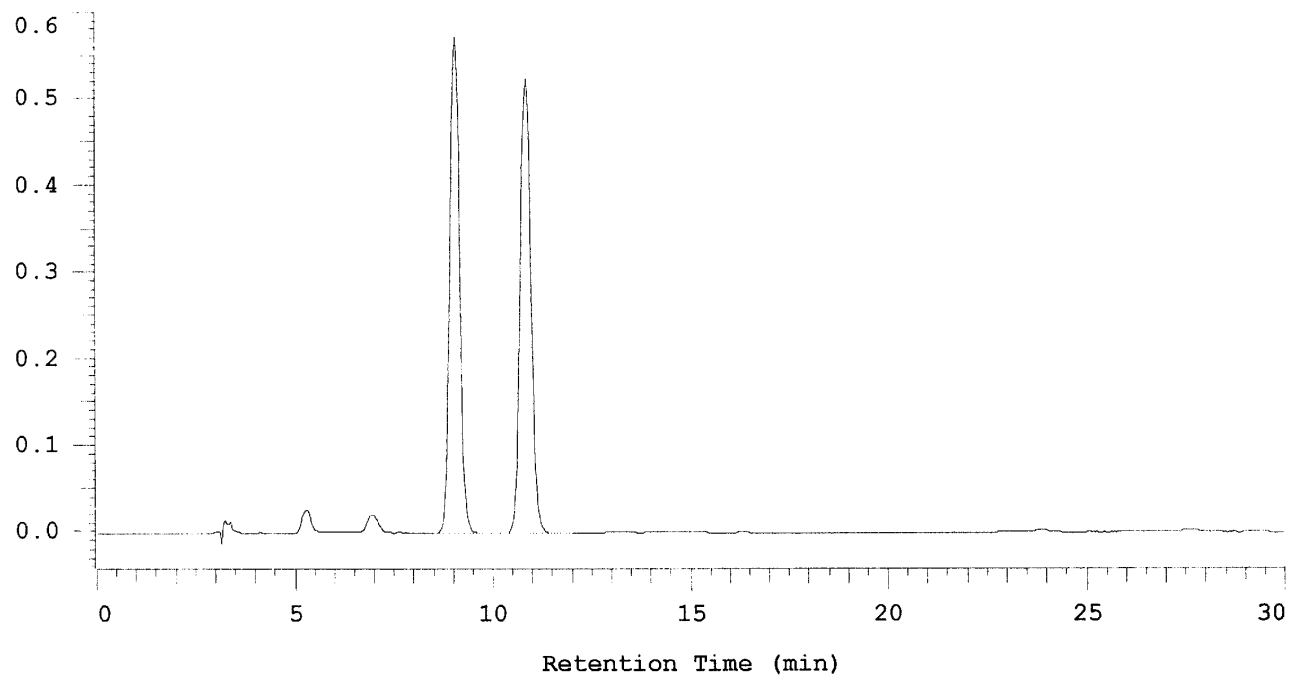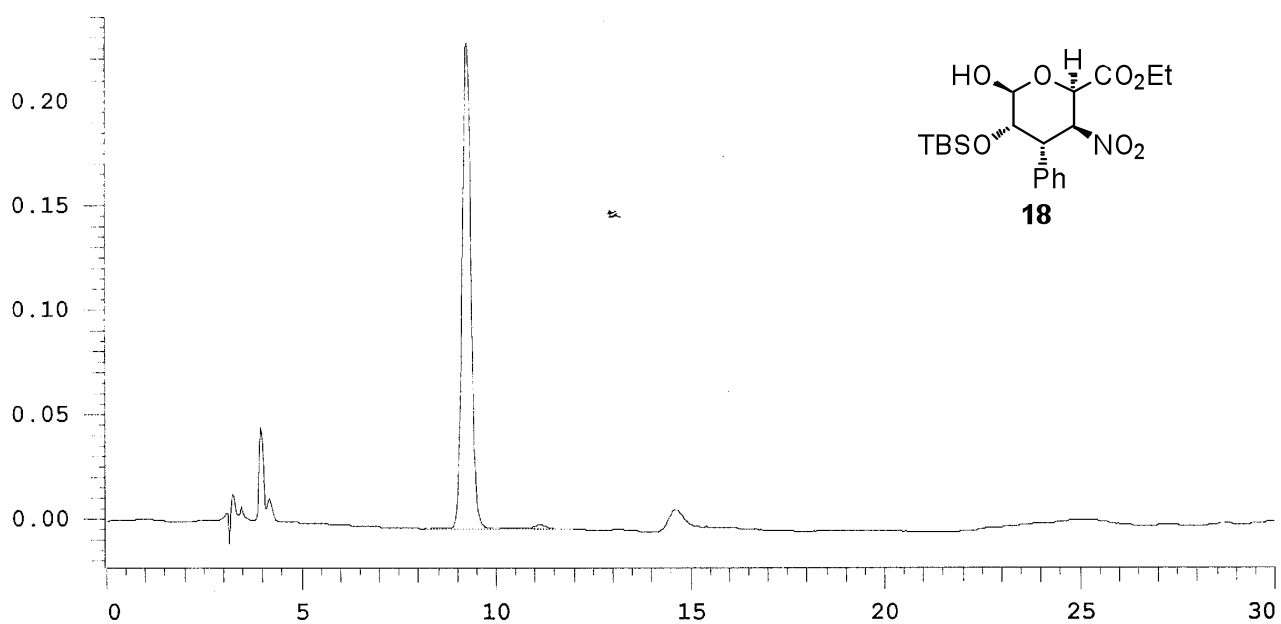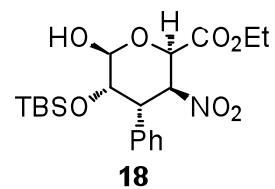

| No. | RT    | Area    | Area %  | Conc 1  | BC  |
|-----|-------|---------|---------|---------|-----|
| 1   | 9.25  | 1752720 | 98.478  | 98.478  | BV  |
| 2   | 10.67 | 7280    | 0.409   | 0.409   | TBB |
| 3   | 11.12 | 19799   | 1.112   | 1.112   | TBB |
|     |       | 1779799 | 100.000 | 100.000 |     |

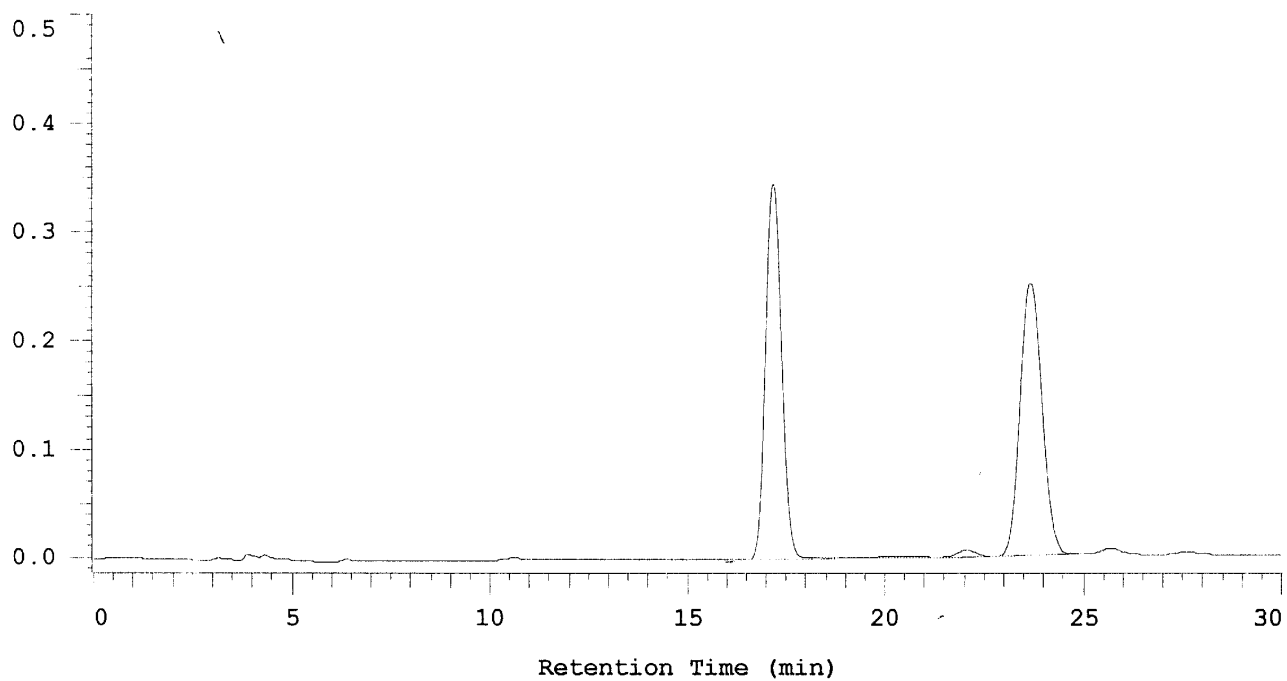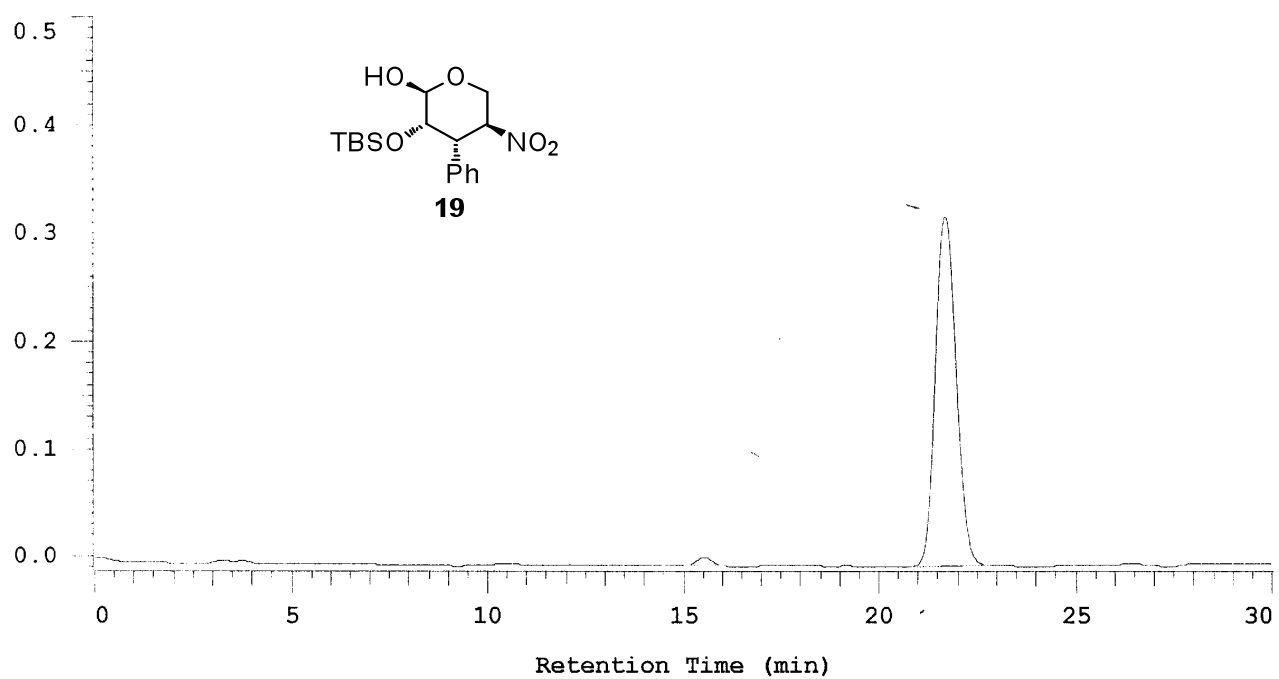

| No. | RT    | Area    | Area %  | Conc 1  | BC |
|-----|-------|---------|---------|---------|----|
| 1   | 15.53 | 99630   | 1.726   | 1.726   | BB |
| 2   | 21.69 | 5674177 | 98.274  | 98.274  | BB |
|     |       | 5773807 | 100.000 | 100.000 |    |

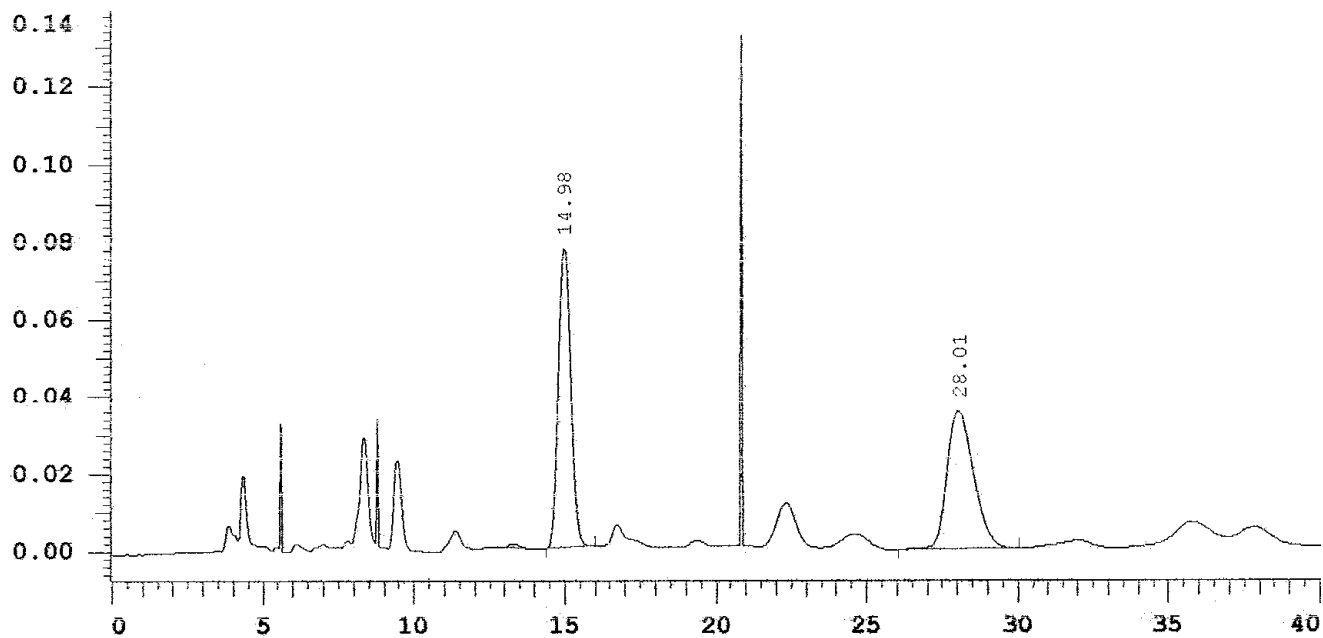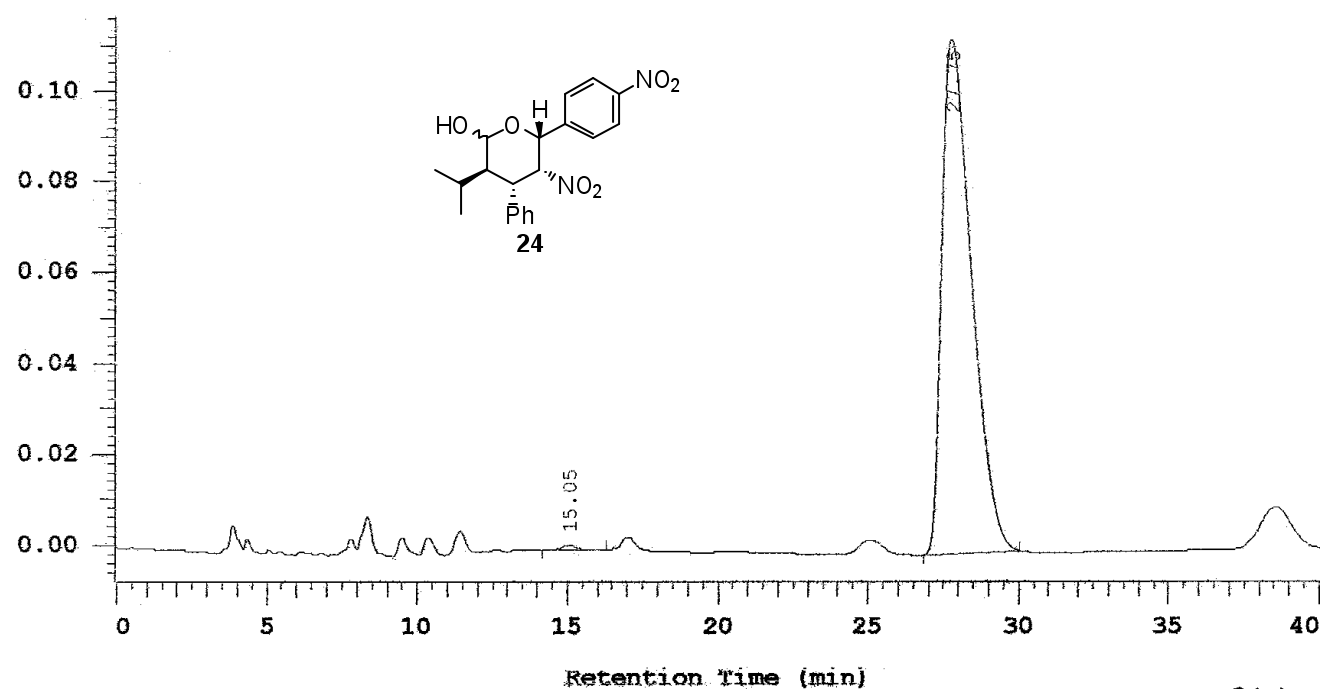

| No. | RT    | Area    | Area %  | Conc 1  | BC |
|-----|-------|---------|---------|---------|----|
| 1   | 15.05 | 18552   | 0.497   | 0.497   | BB |
| 2   | 27.75 | 3717638 | 99.503  | 99.503  | BB |
|     |       | 3736190 | 100.000 | 100.000 |    |

## 6. NMR charts

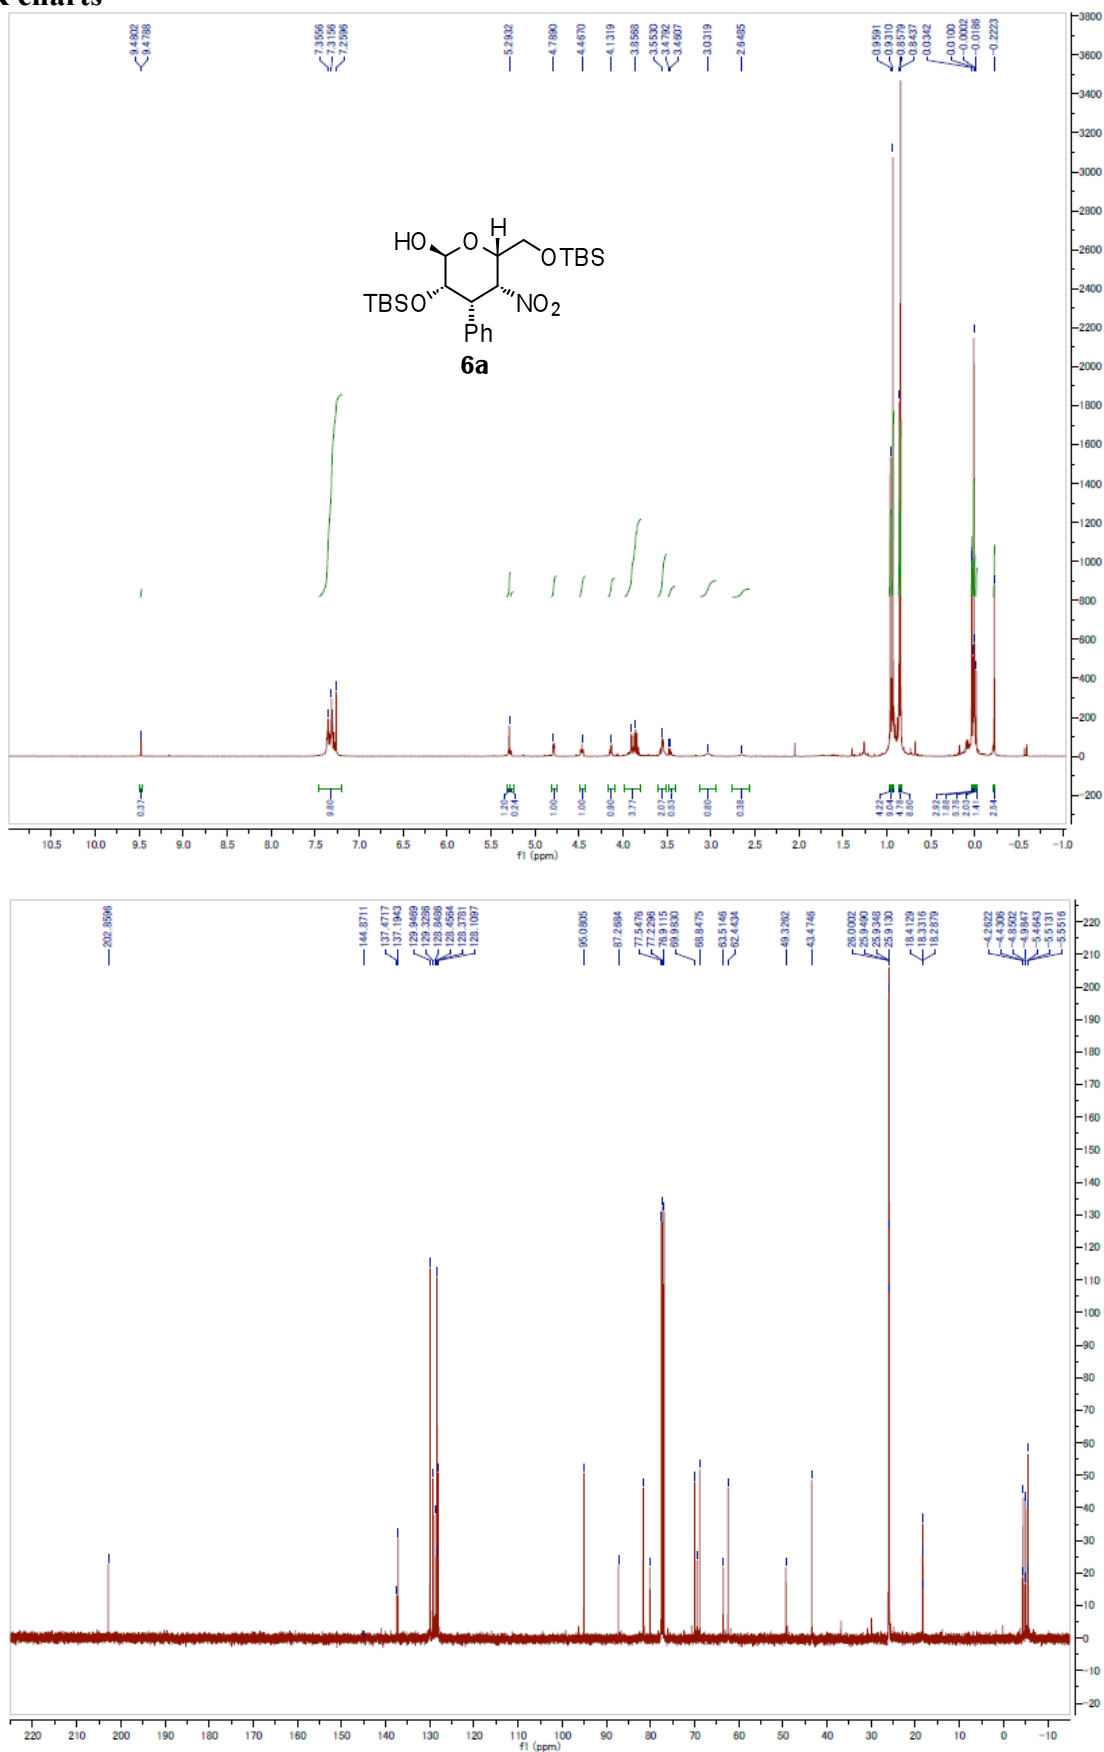

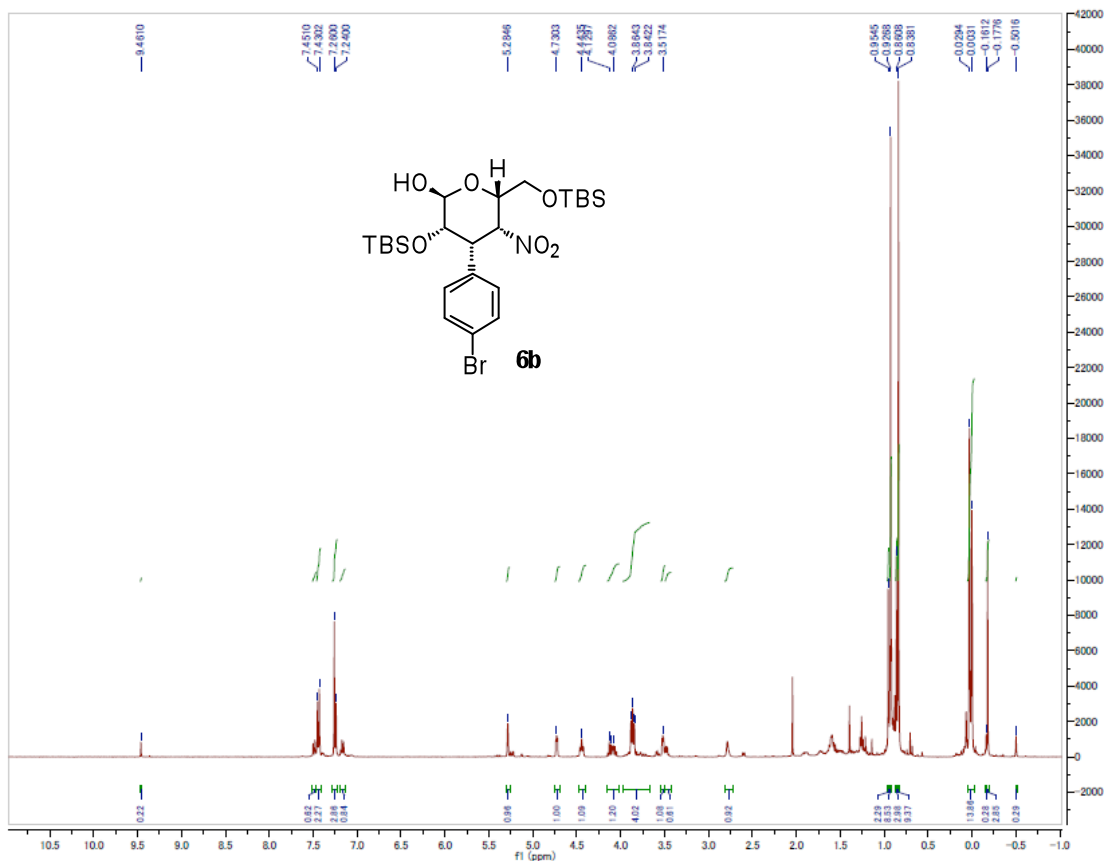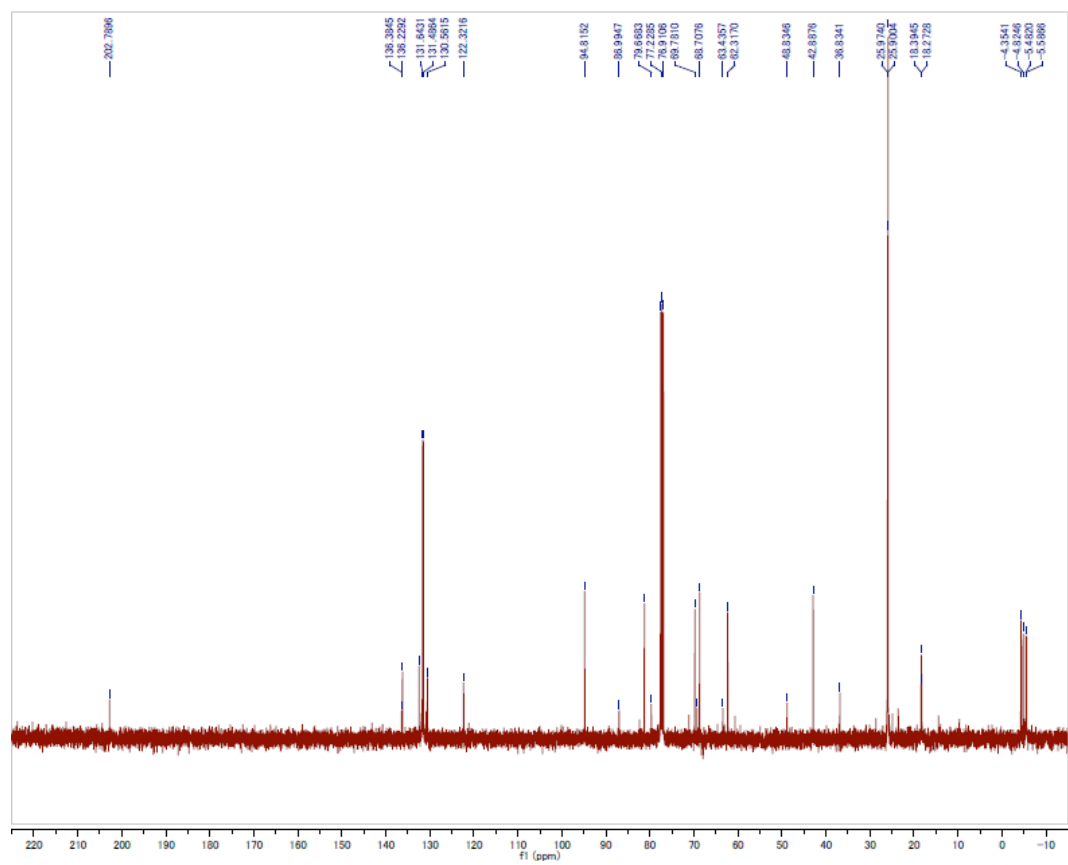



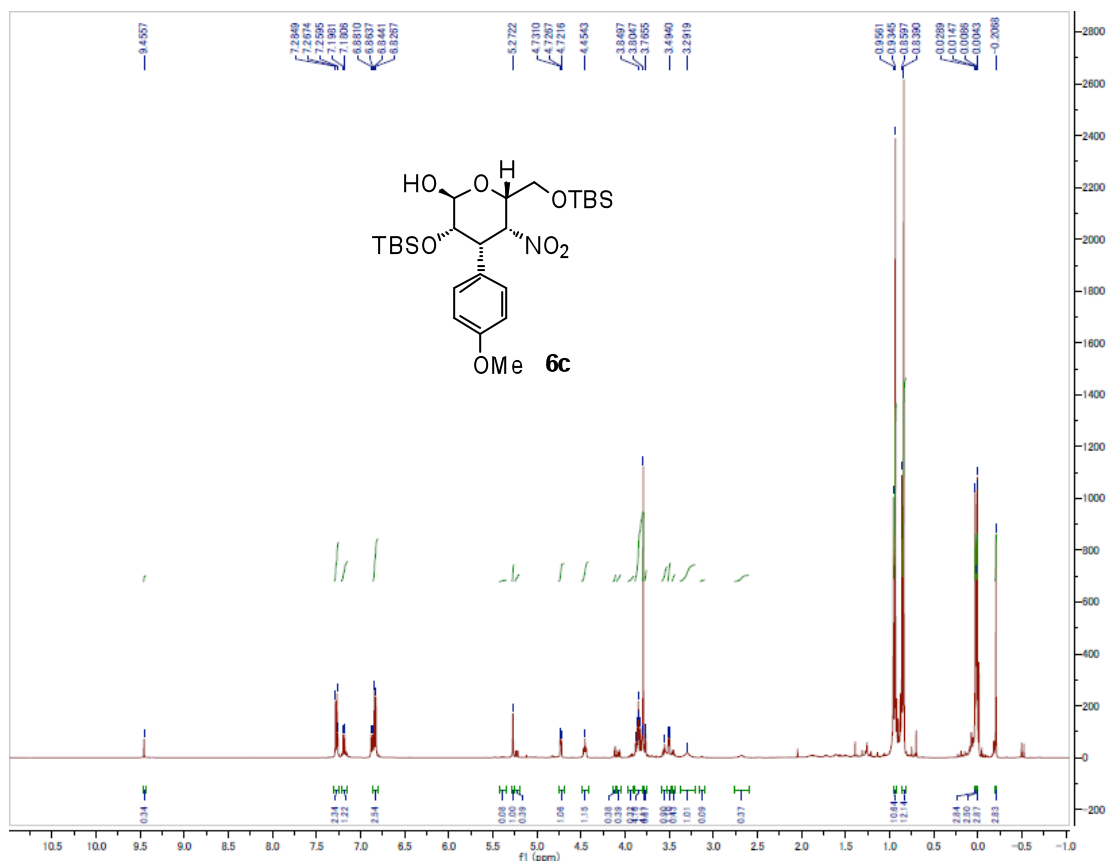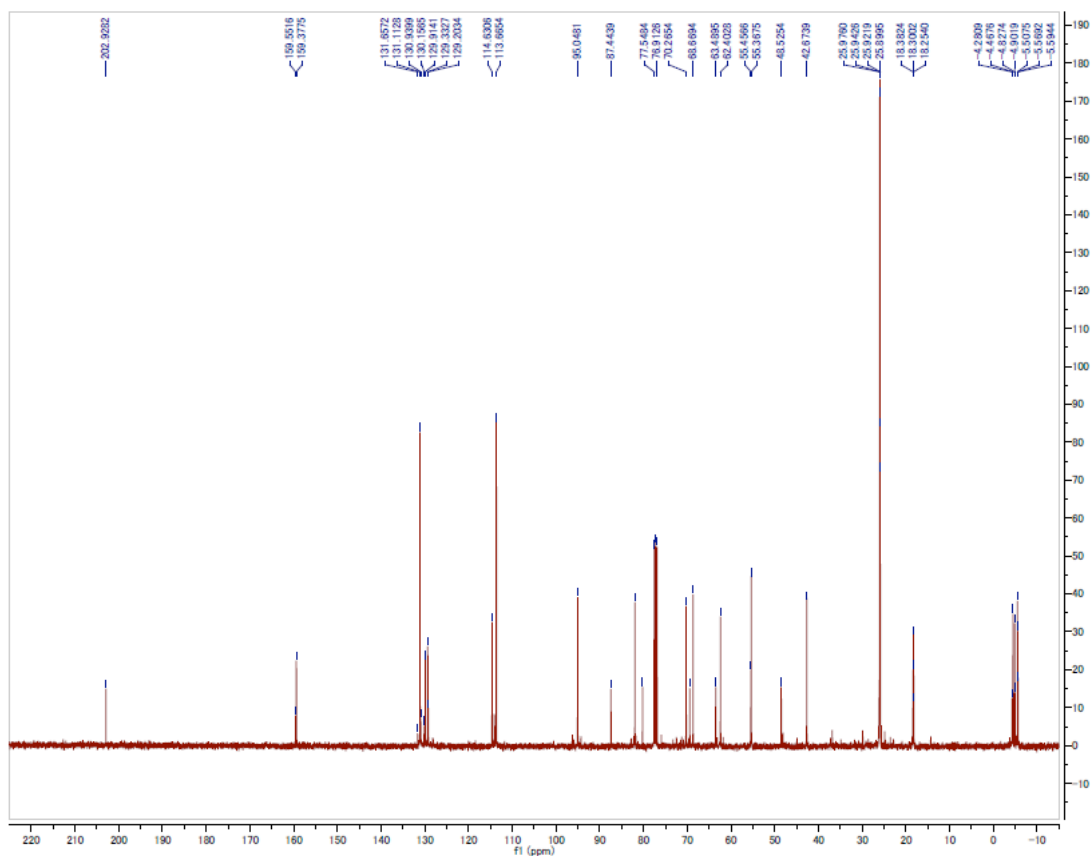

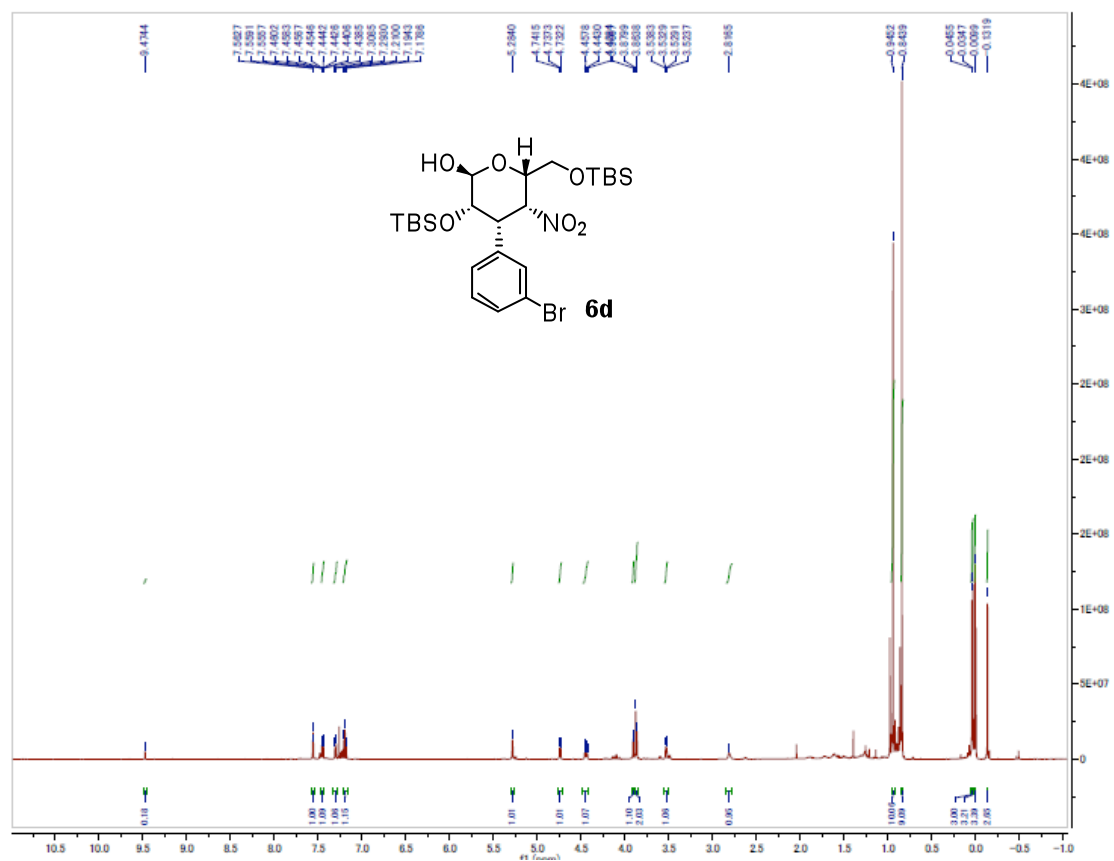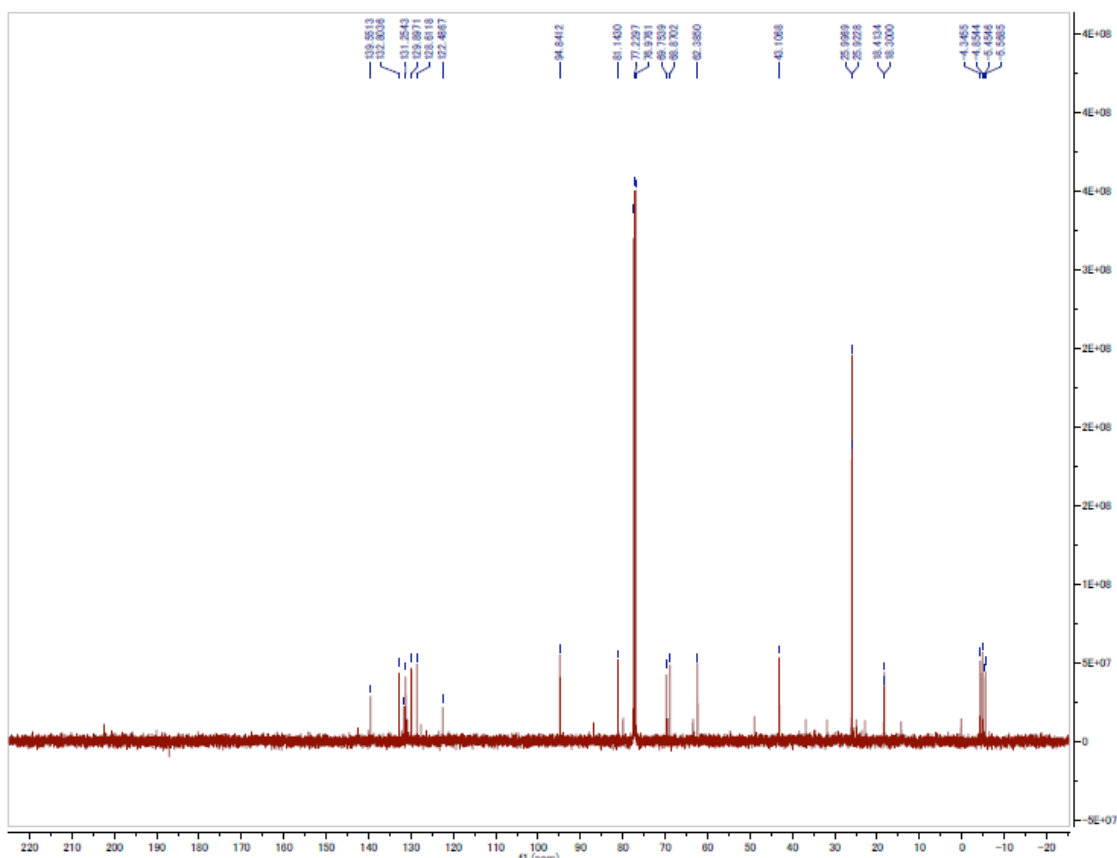

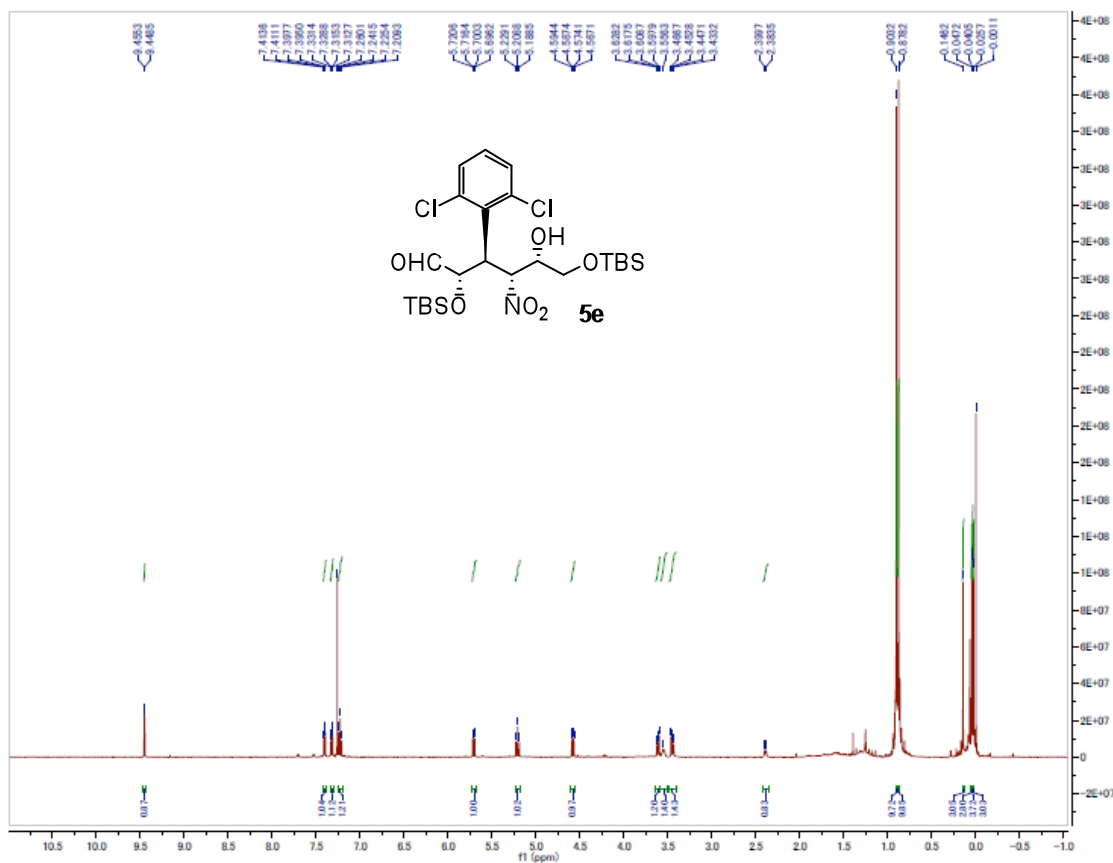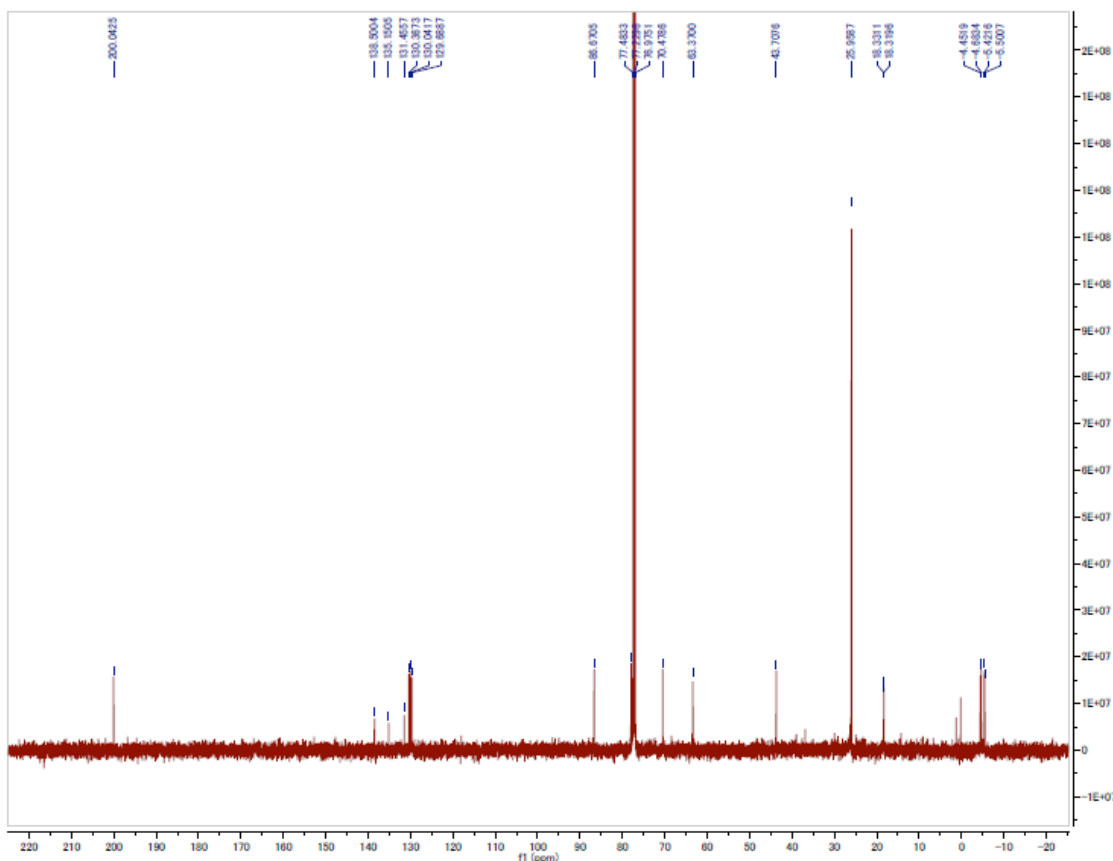

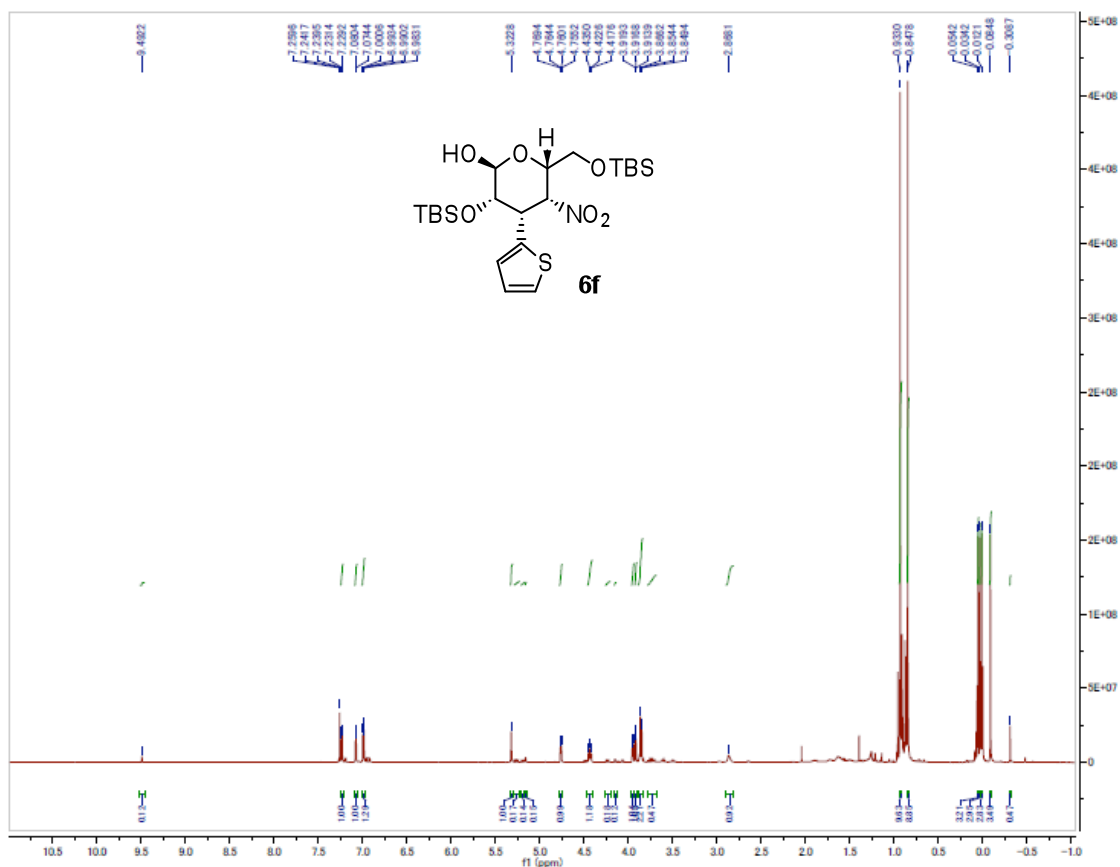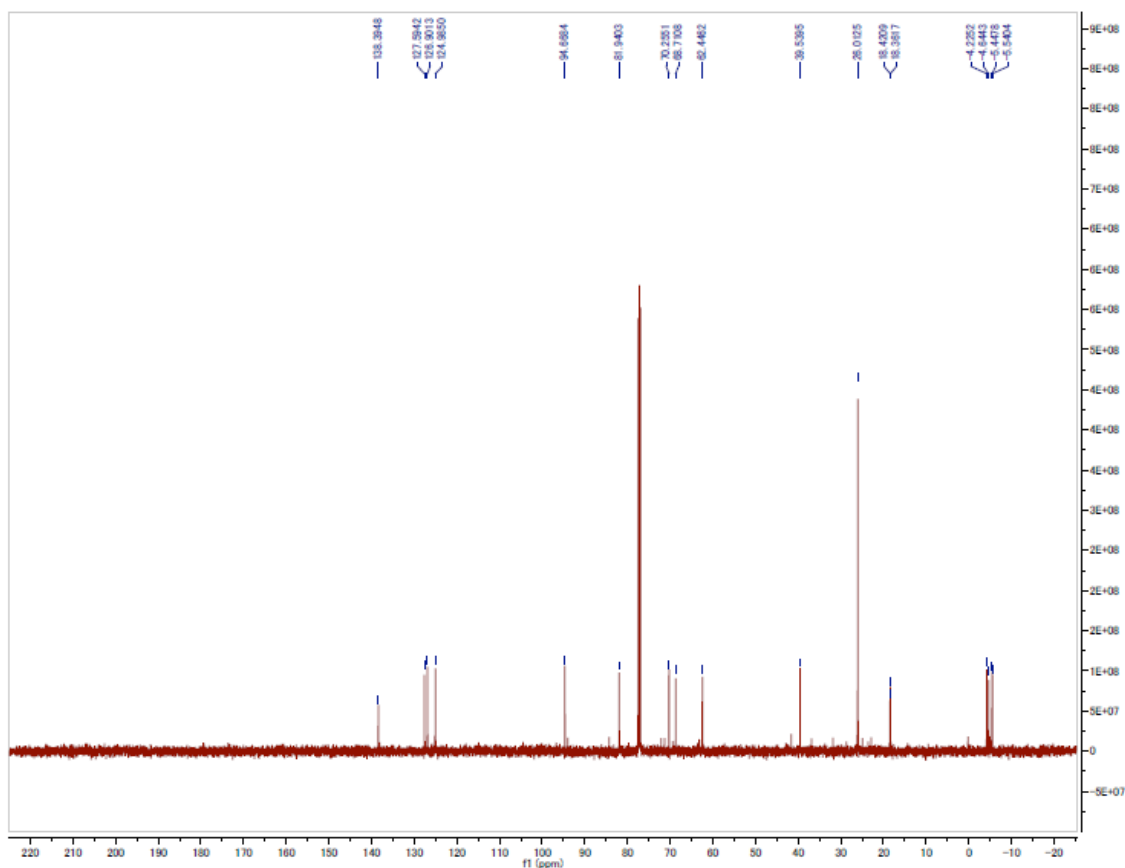

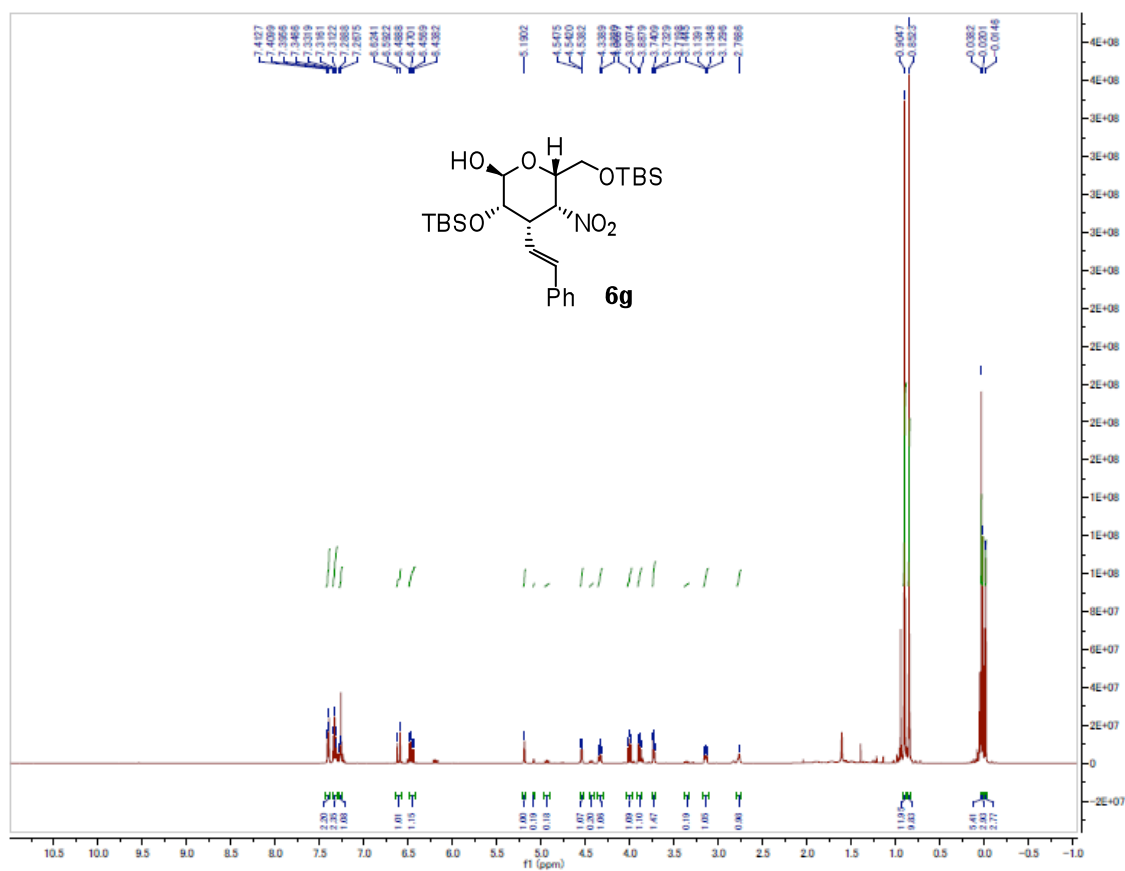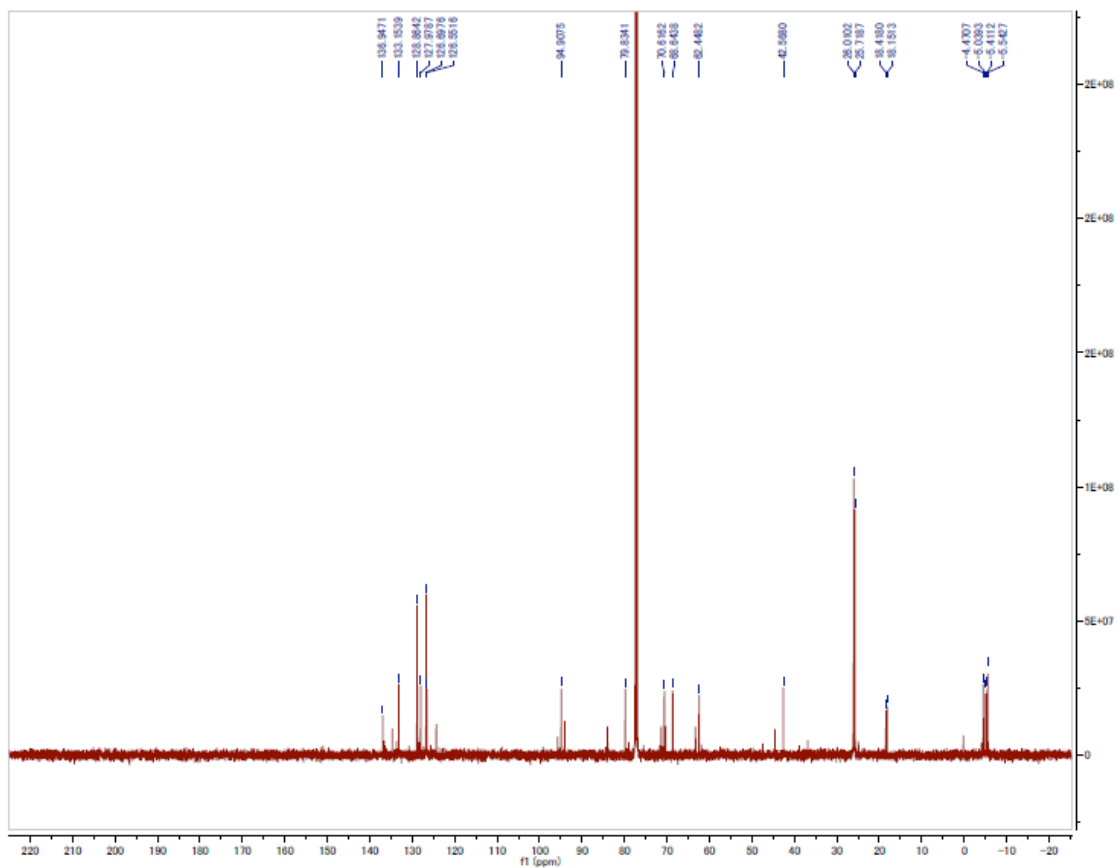

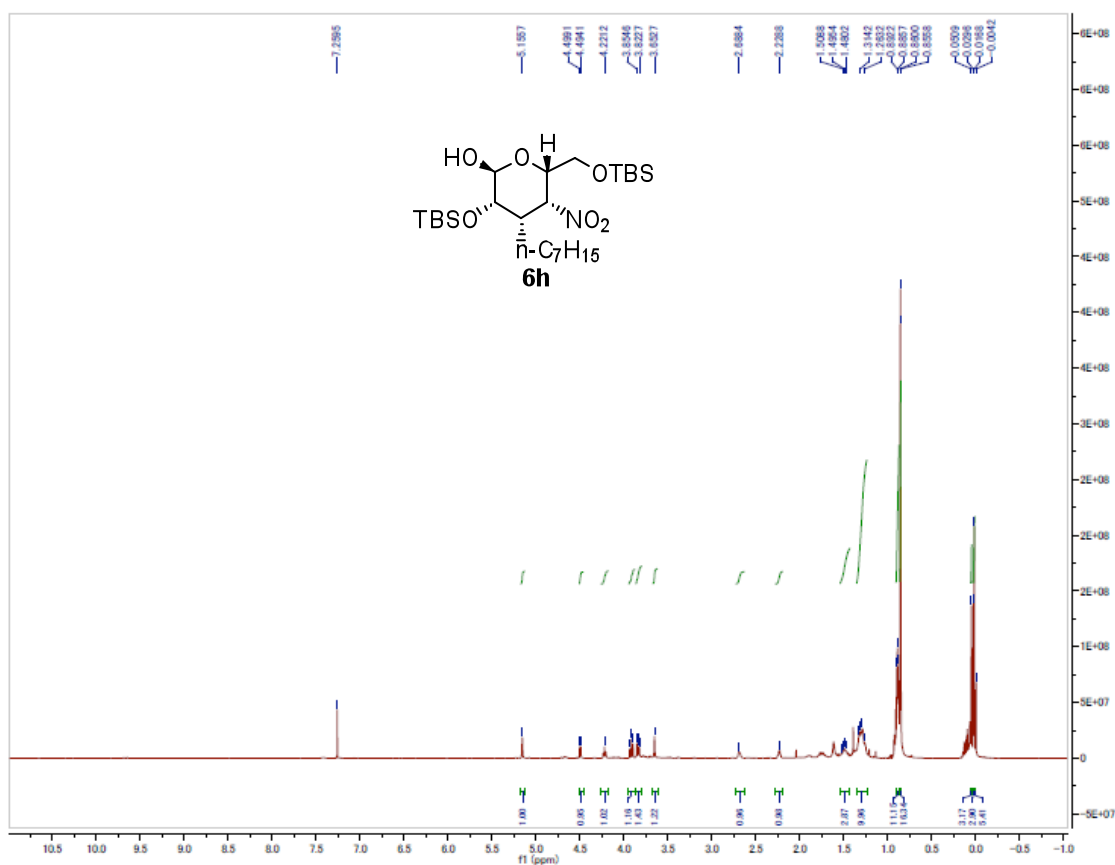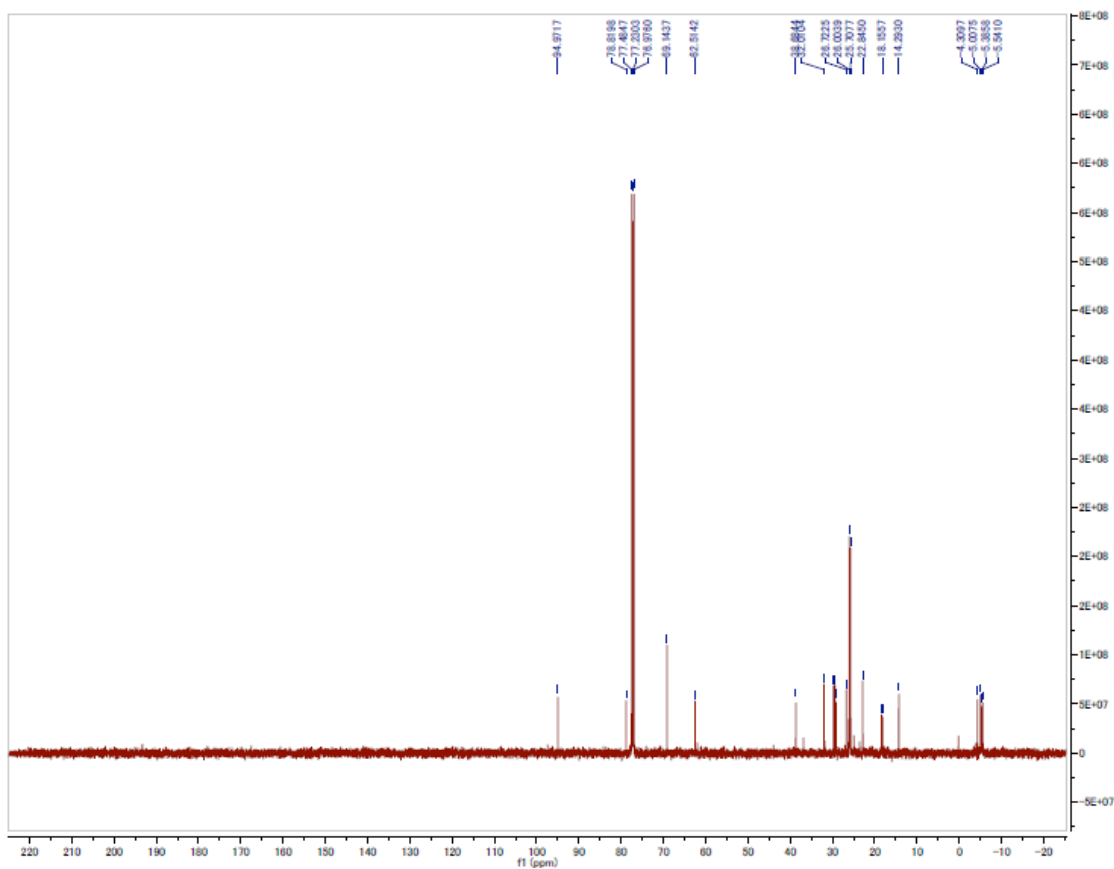

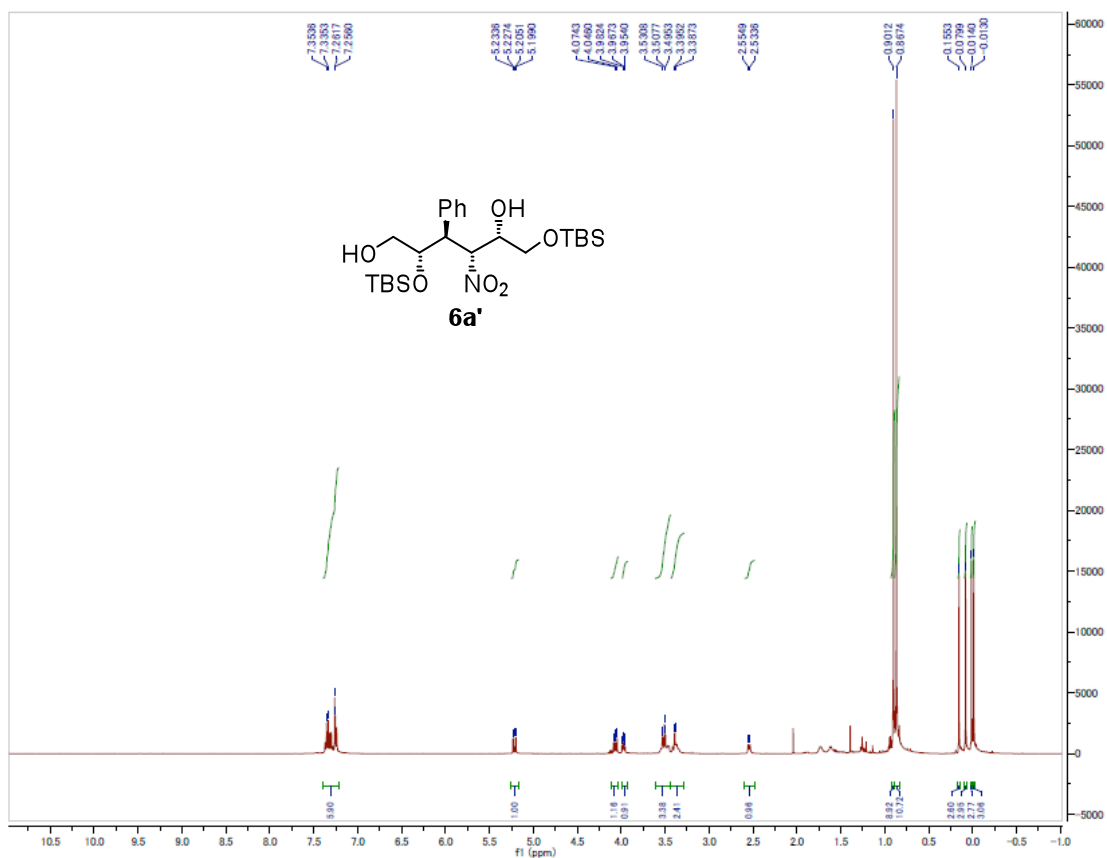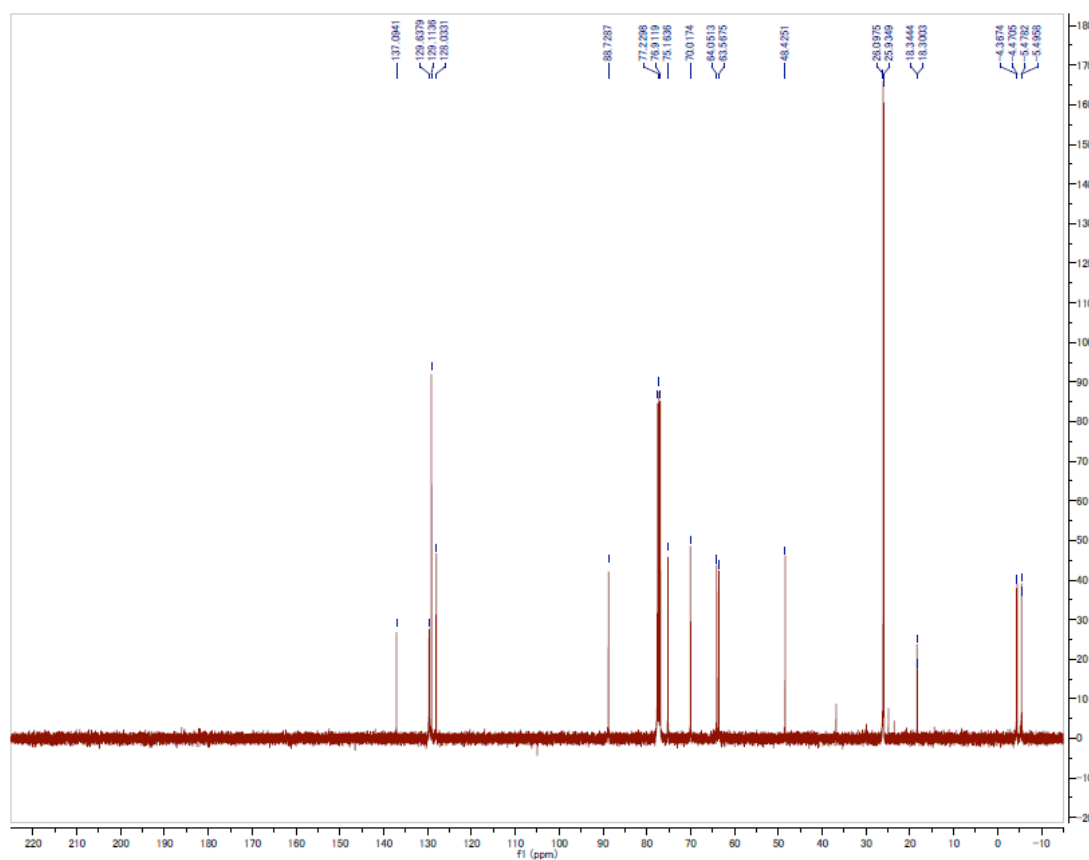

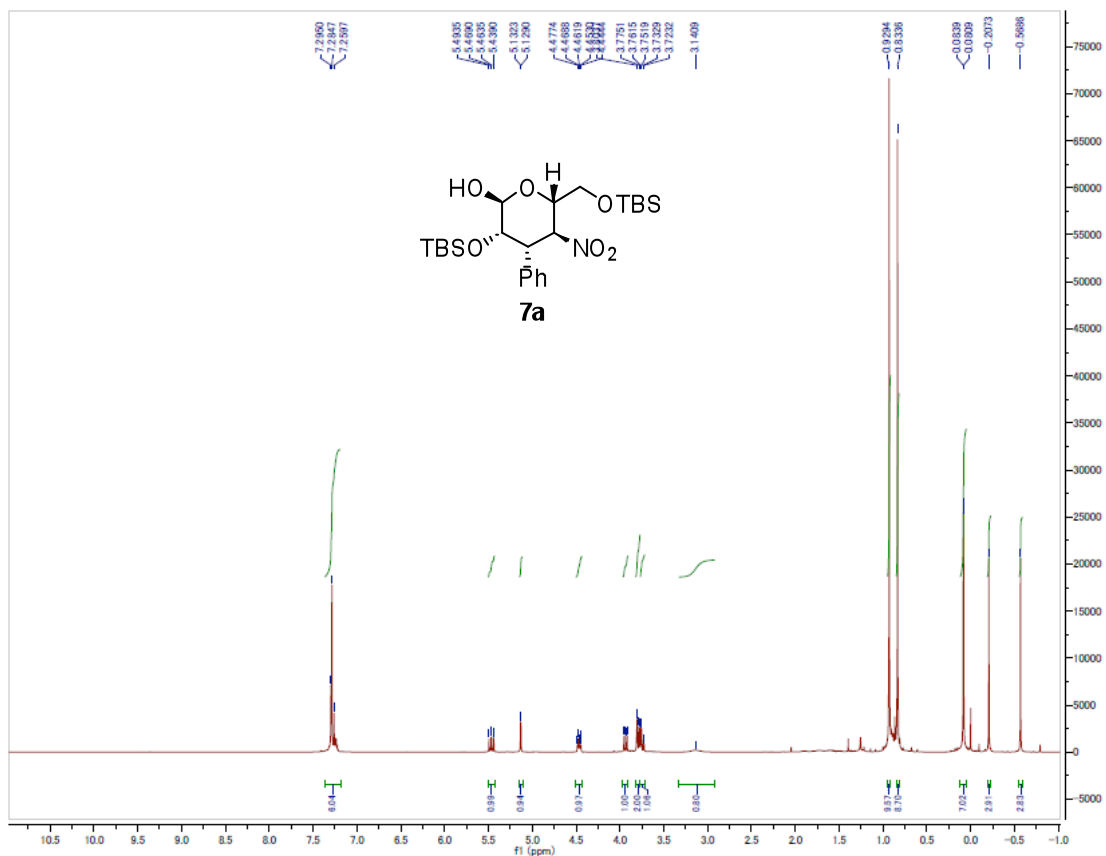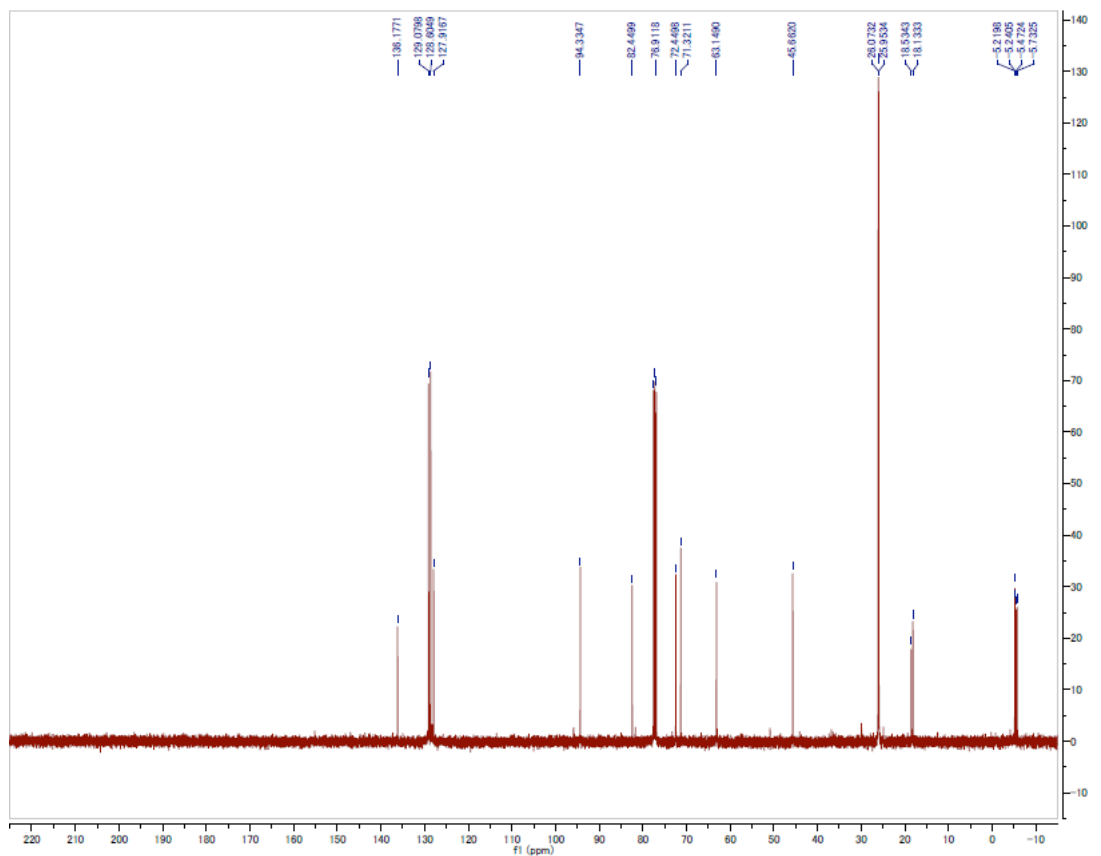



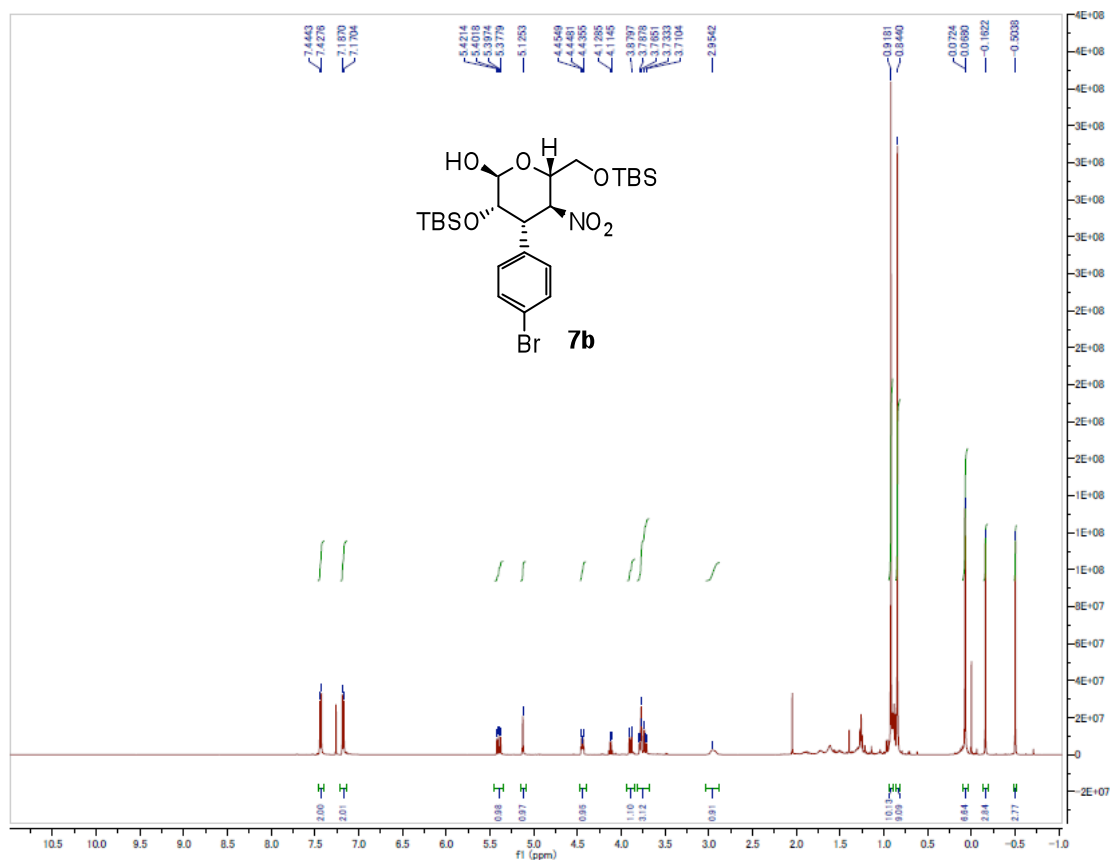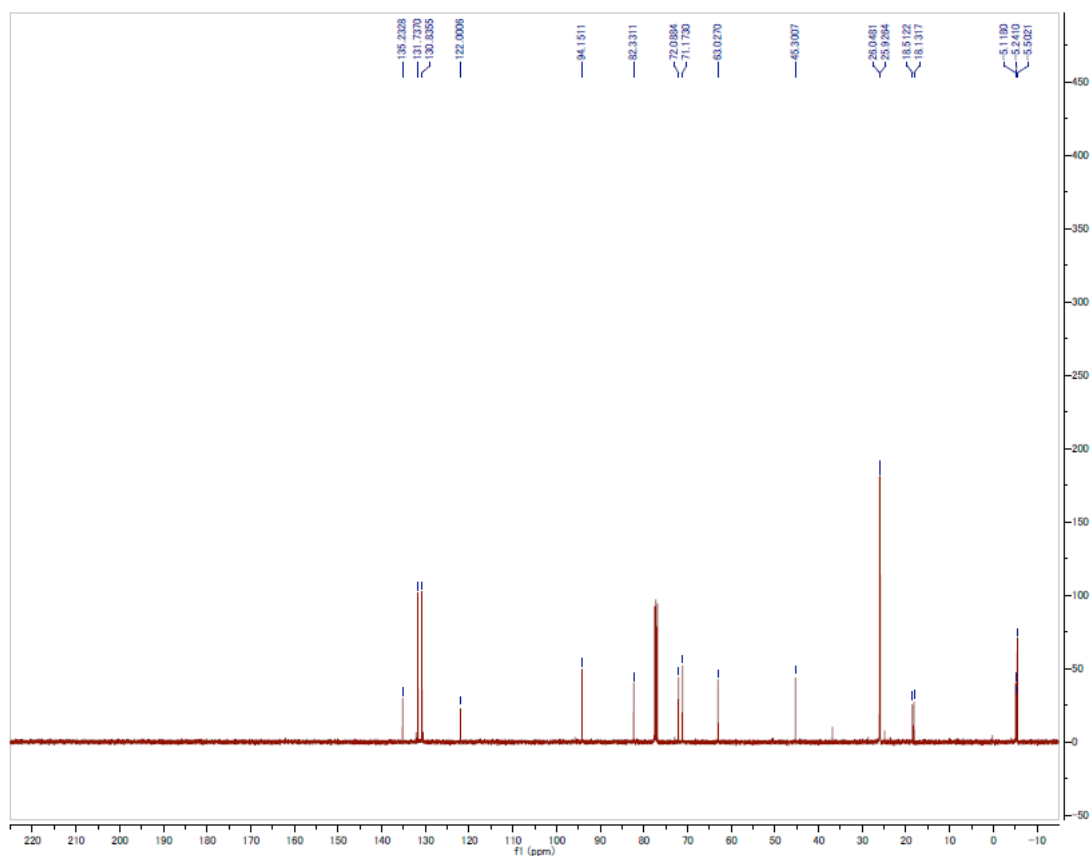

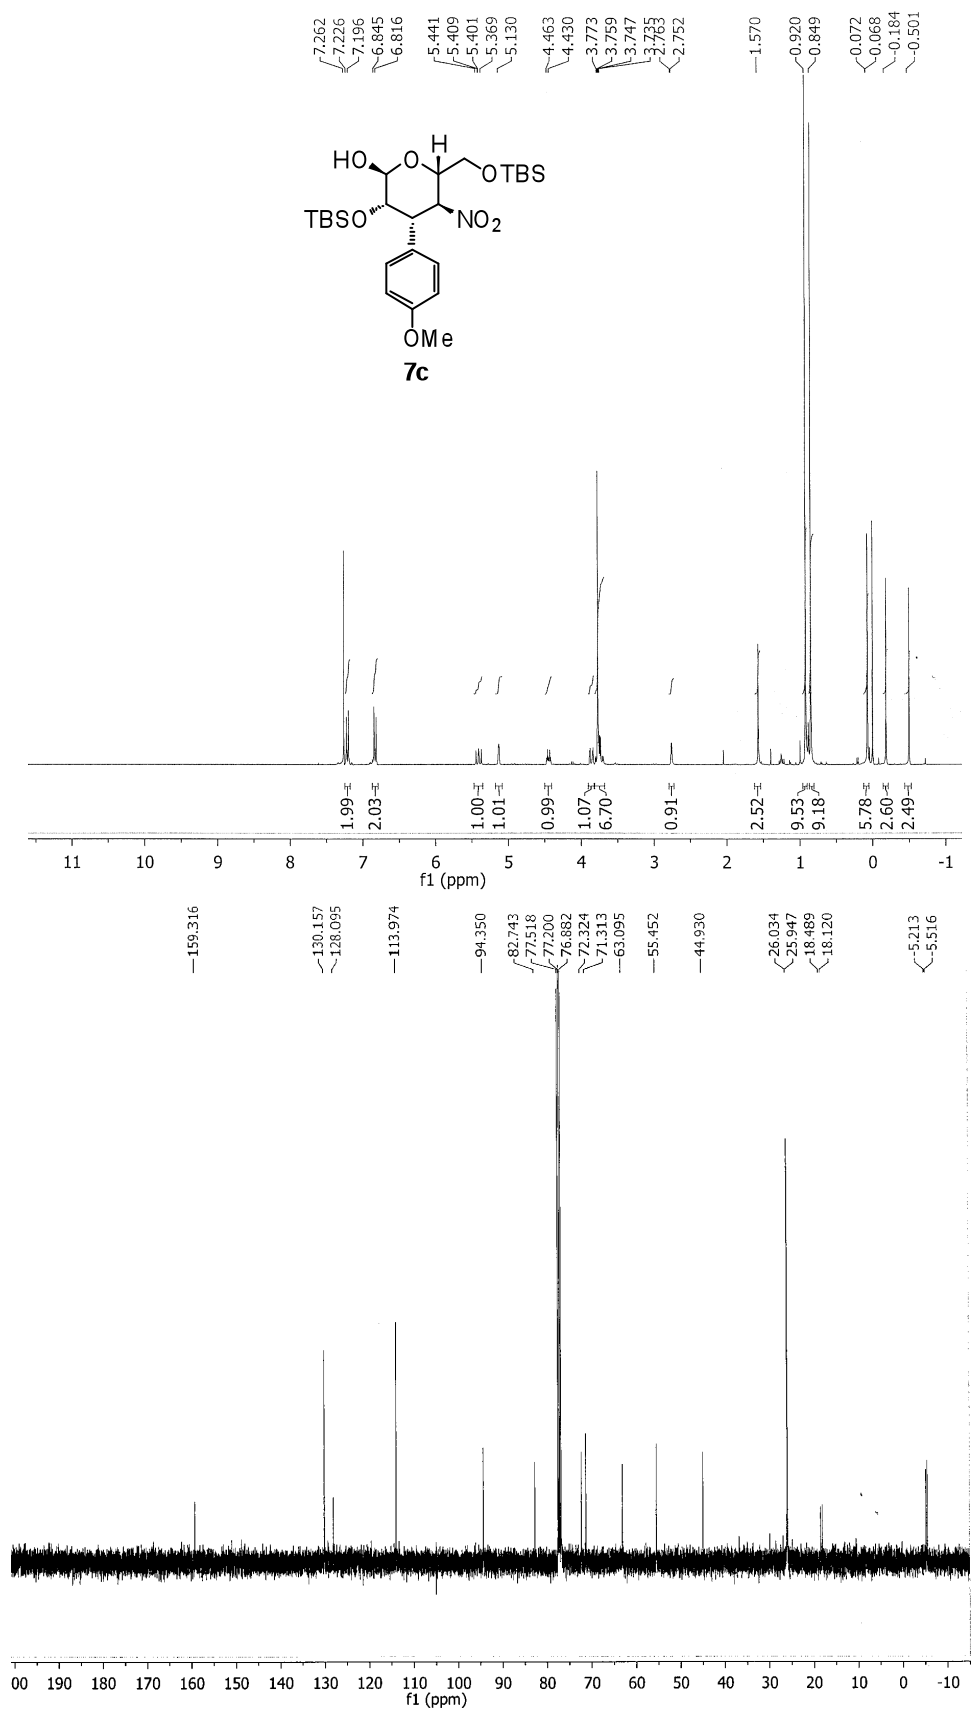

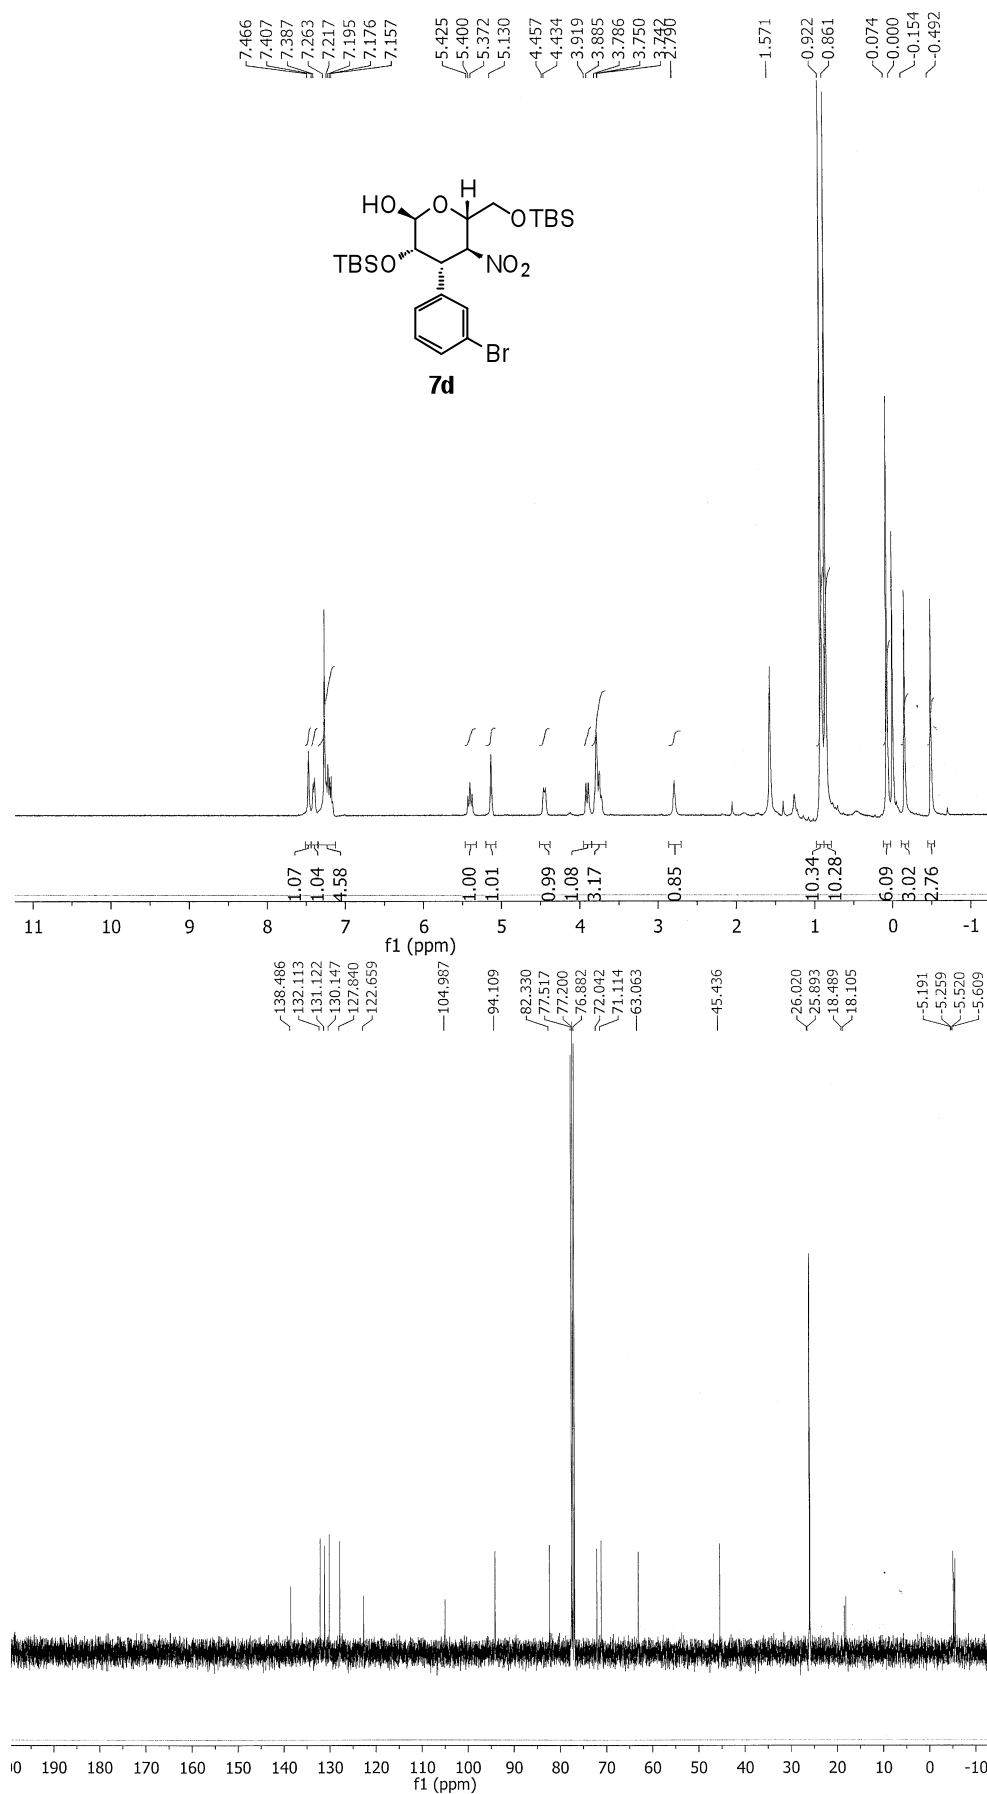

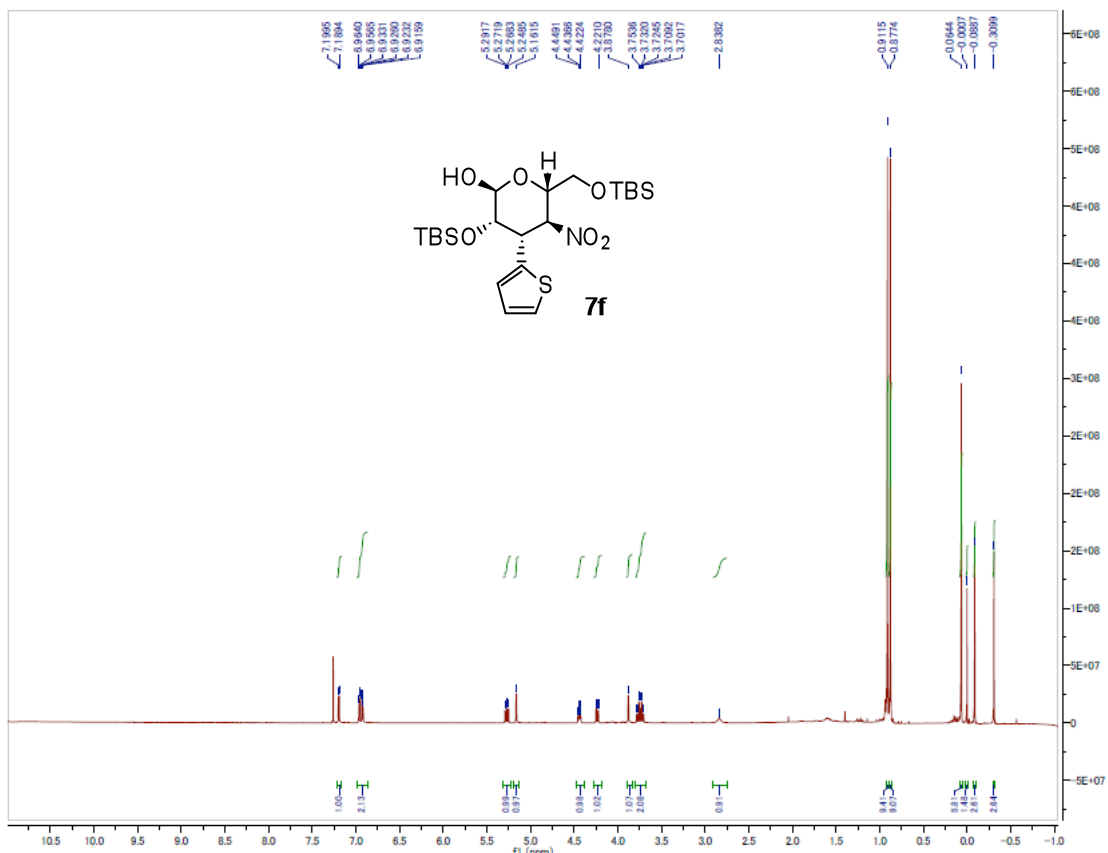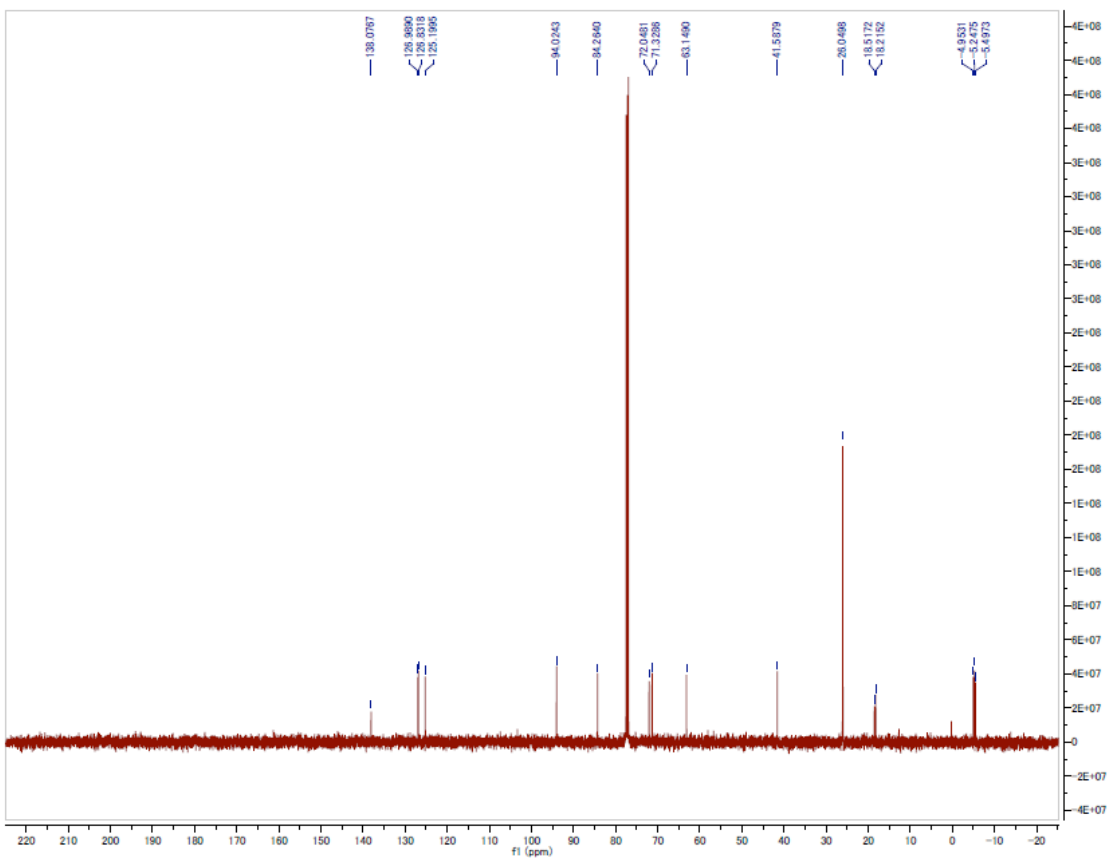

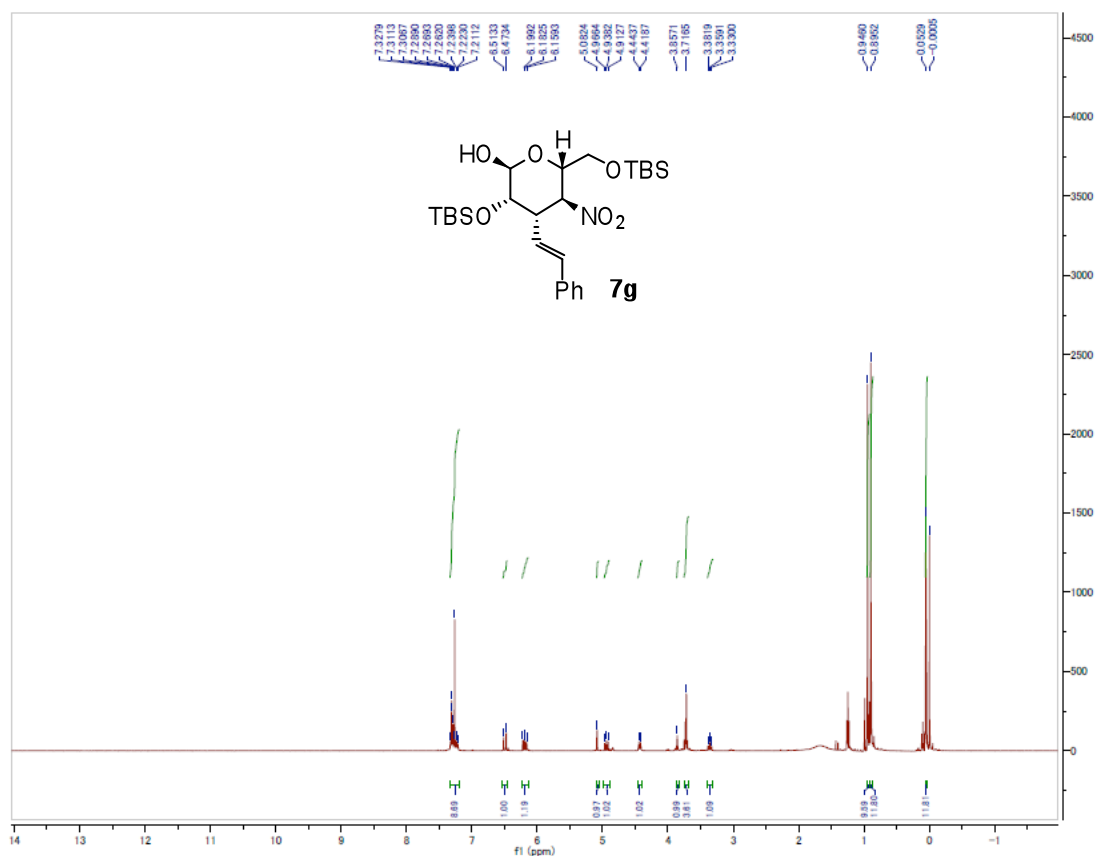

CAMBIAR sin Et2O

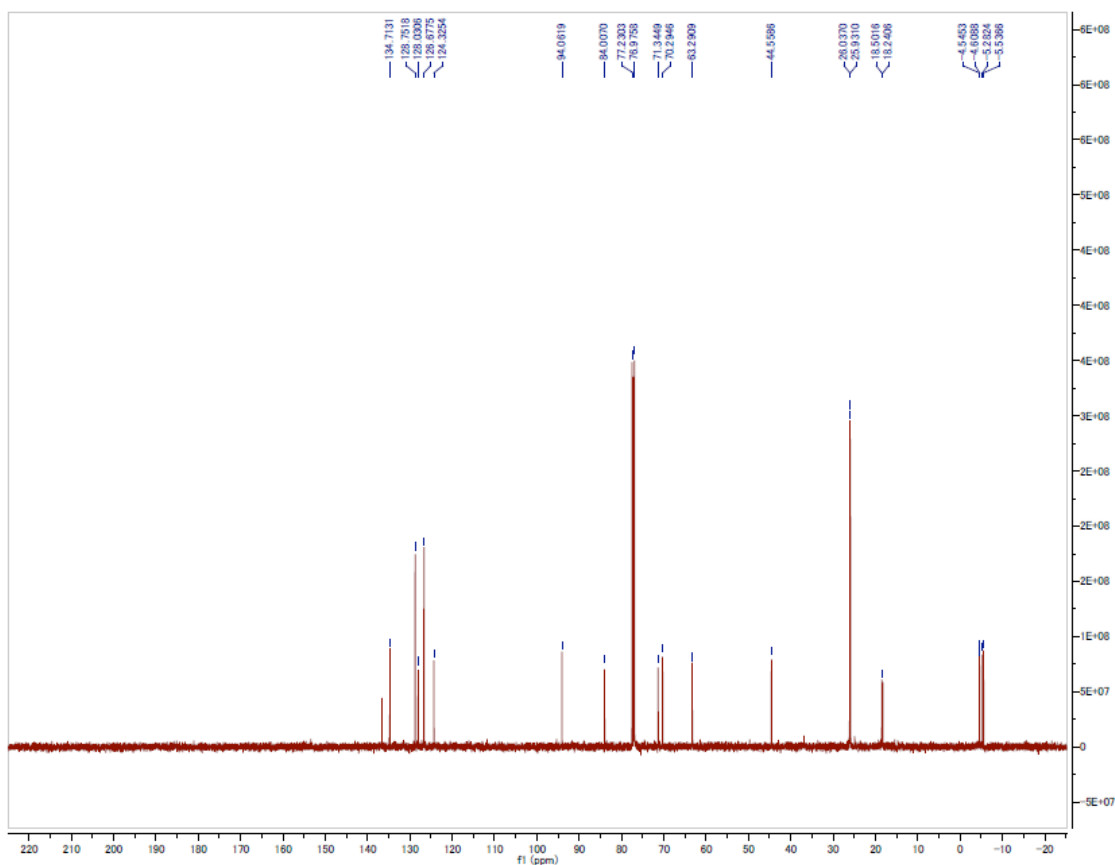

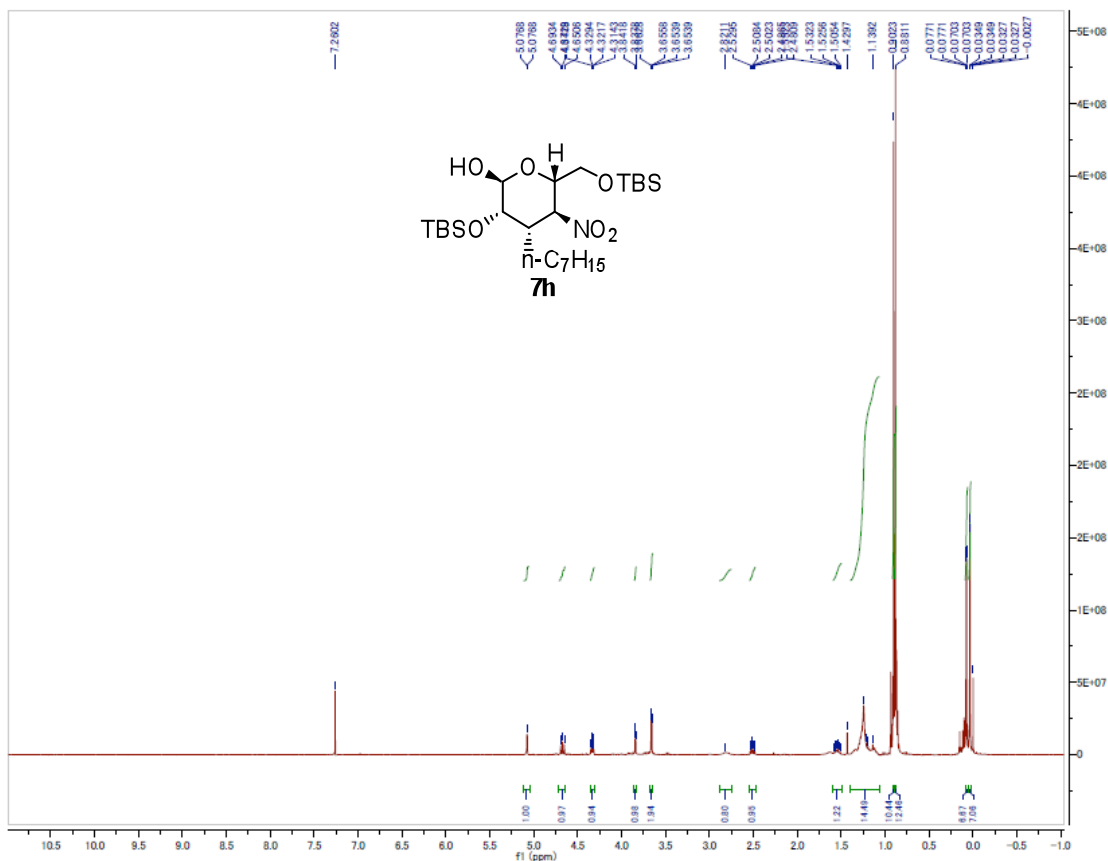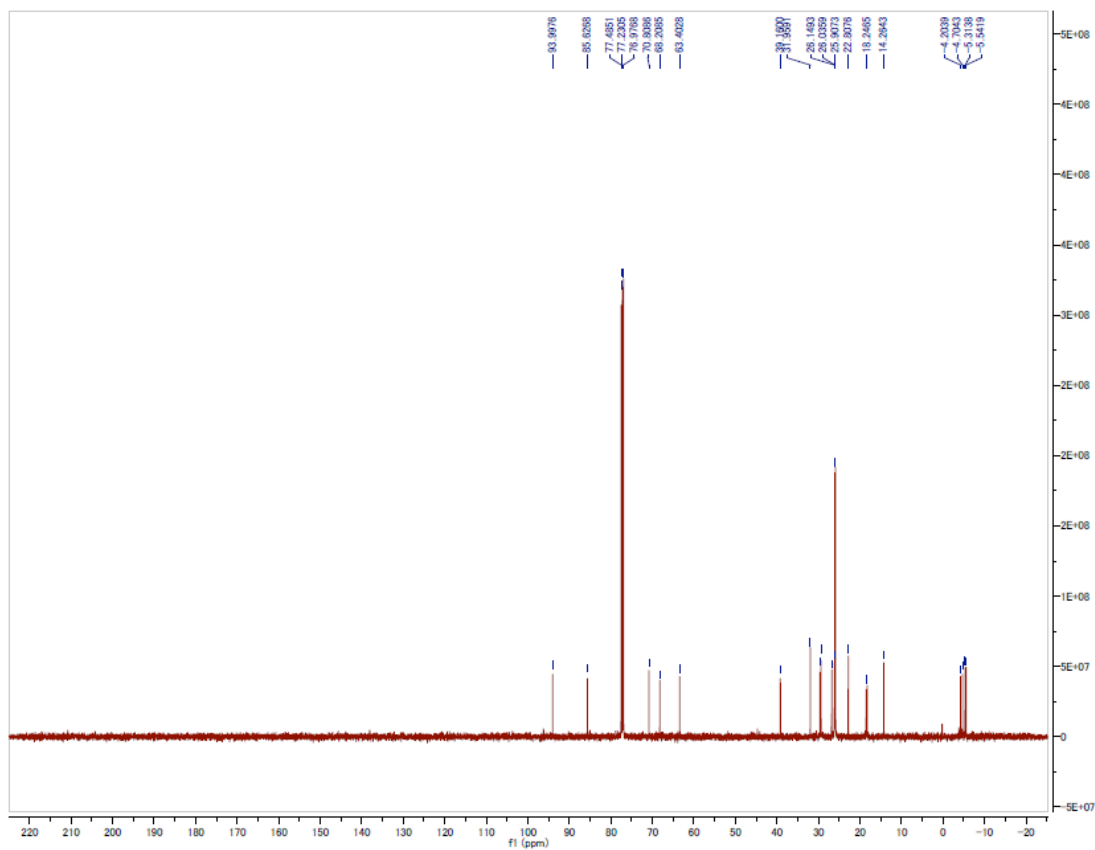

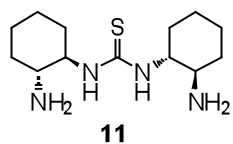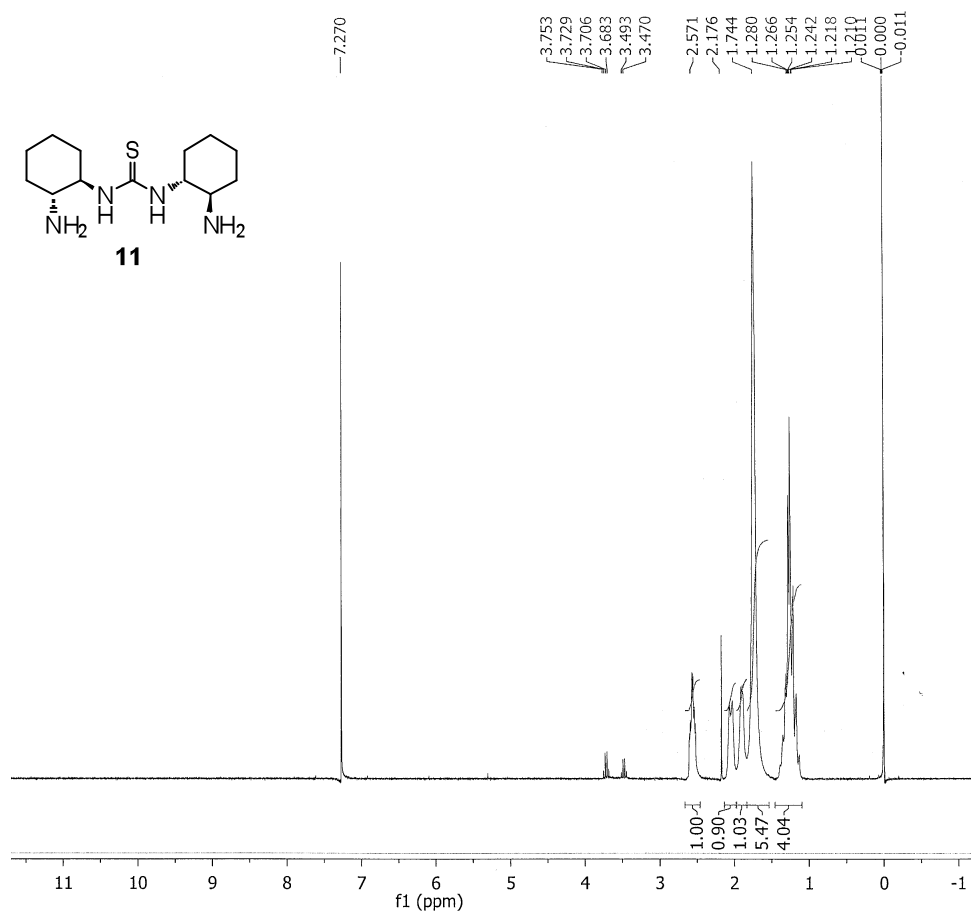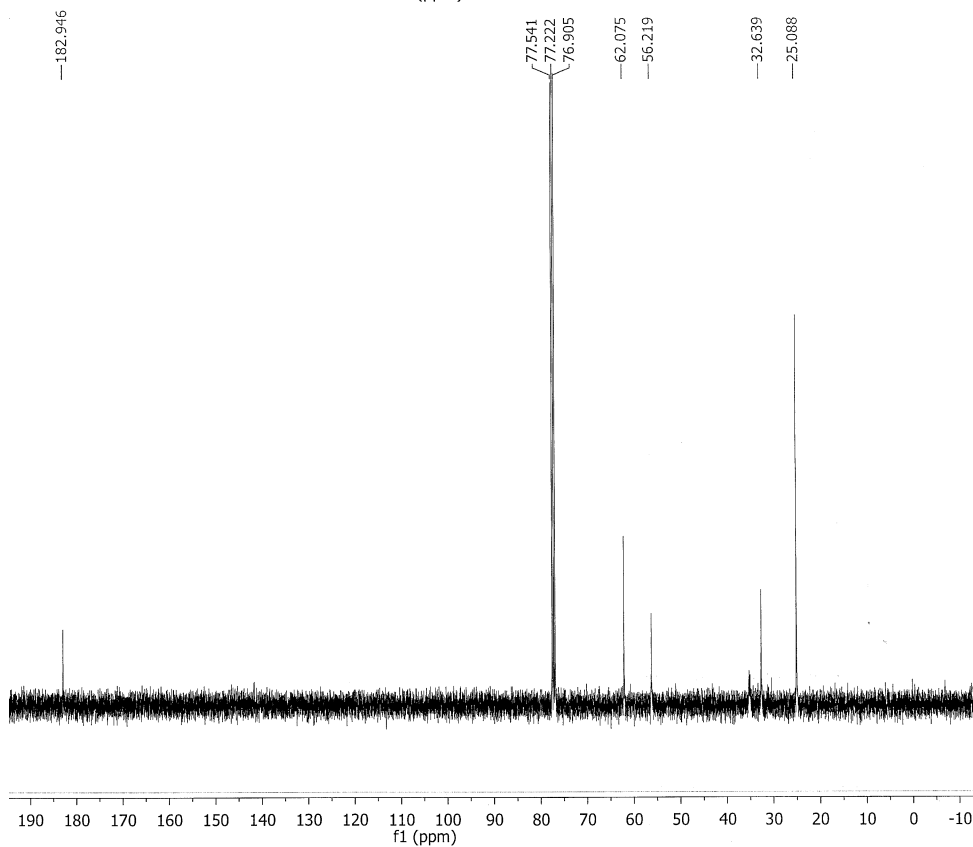

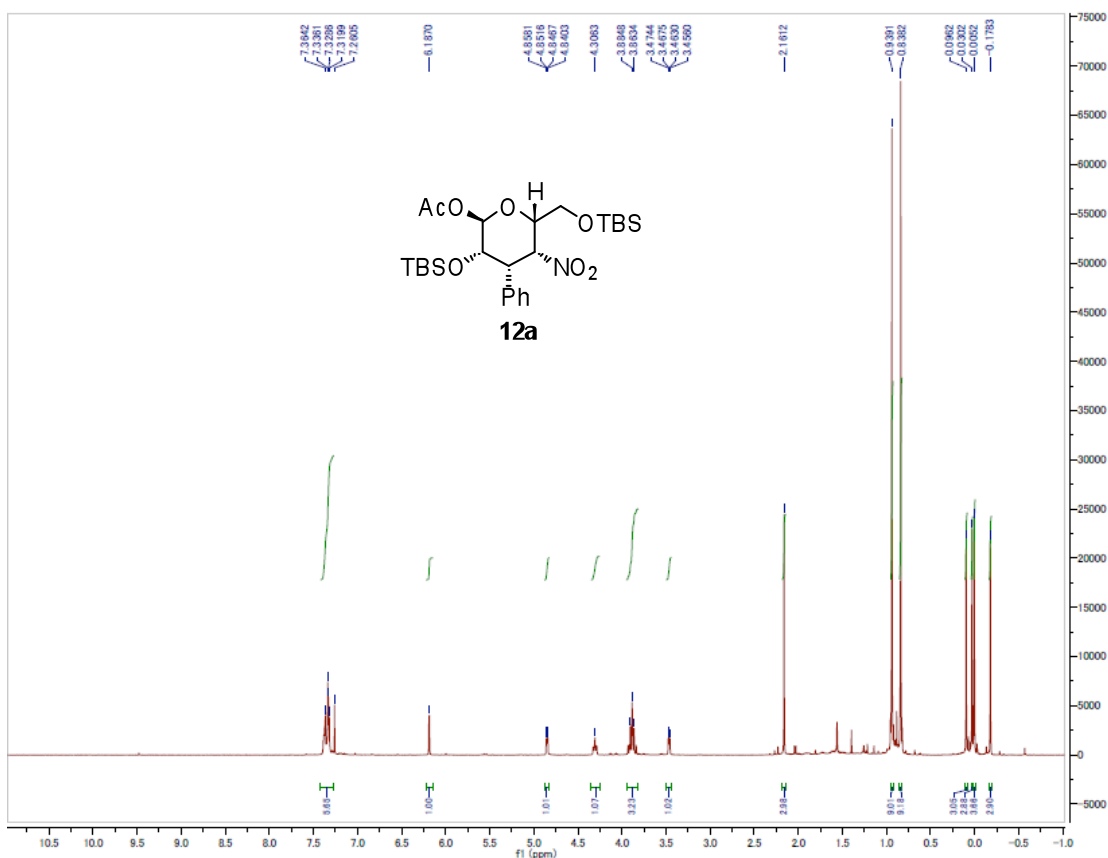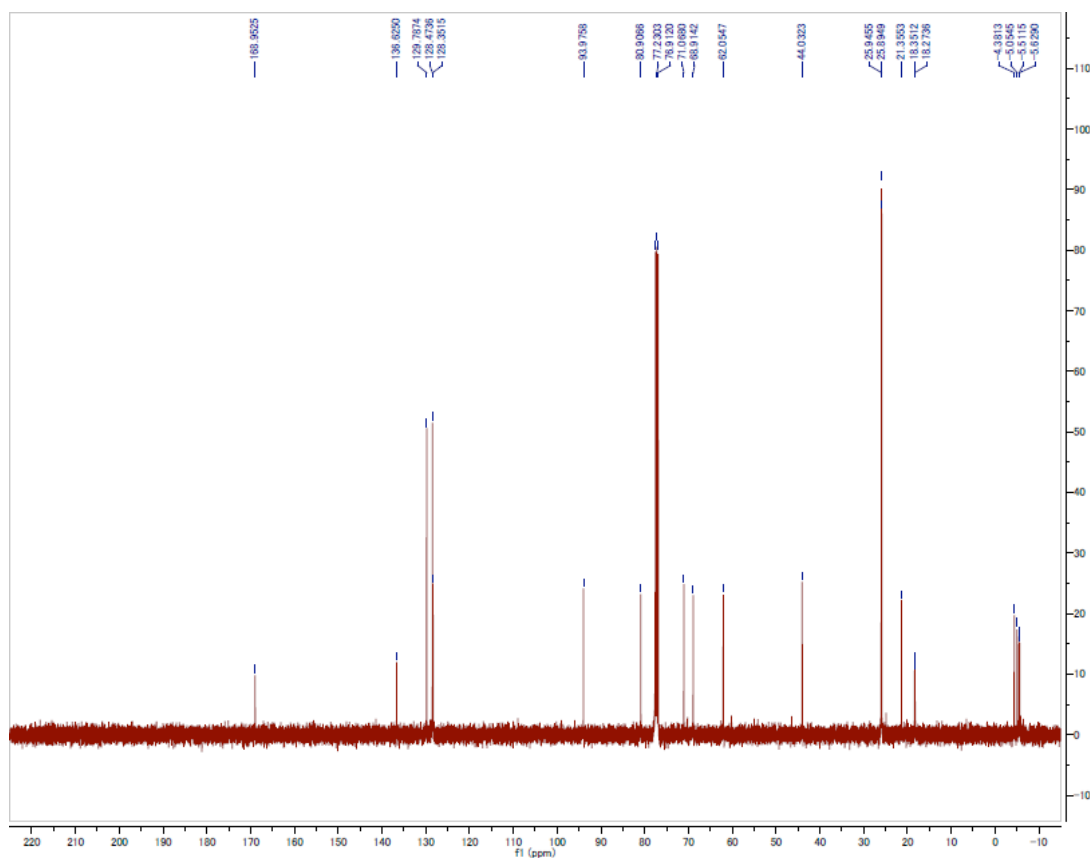



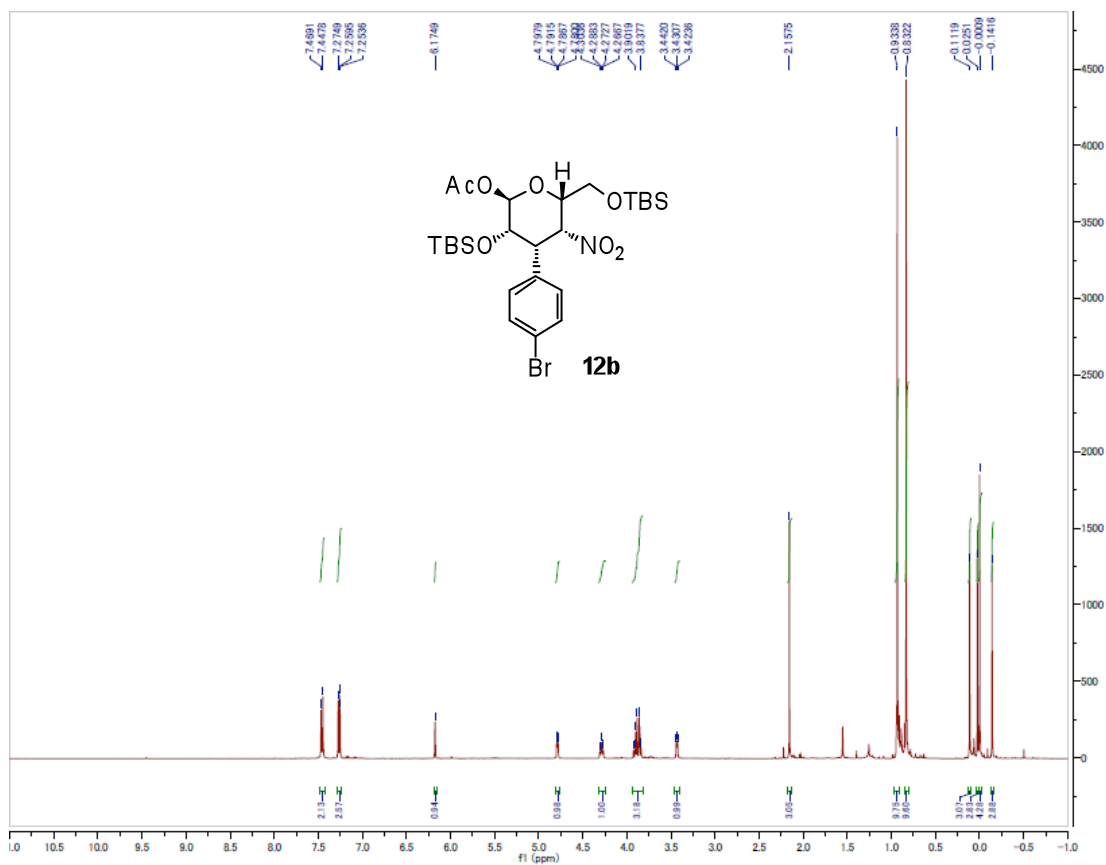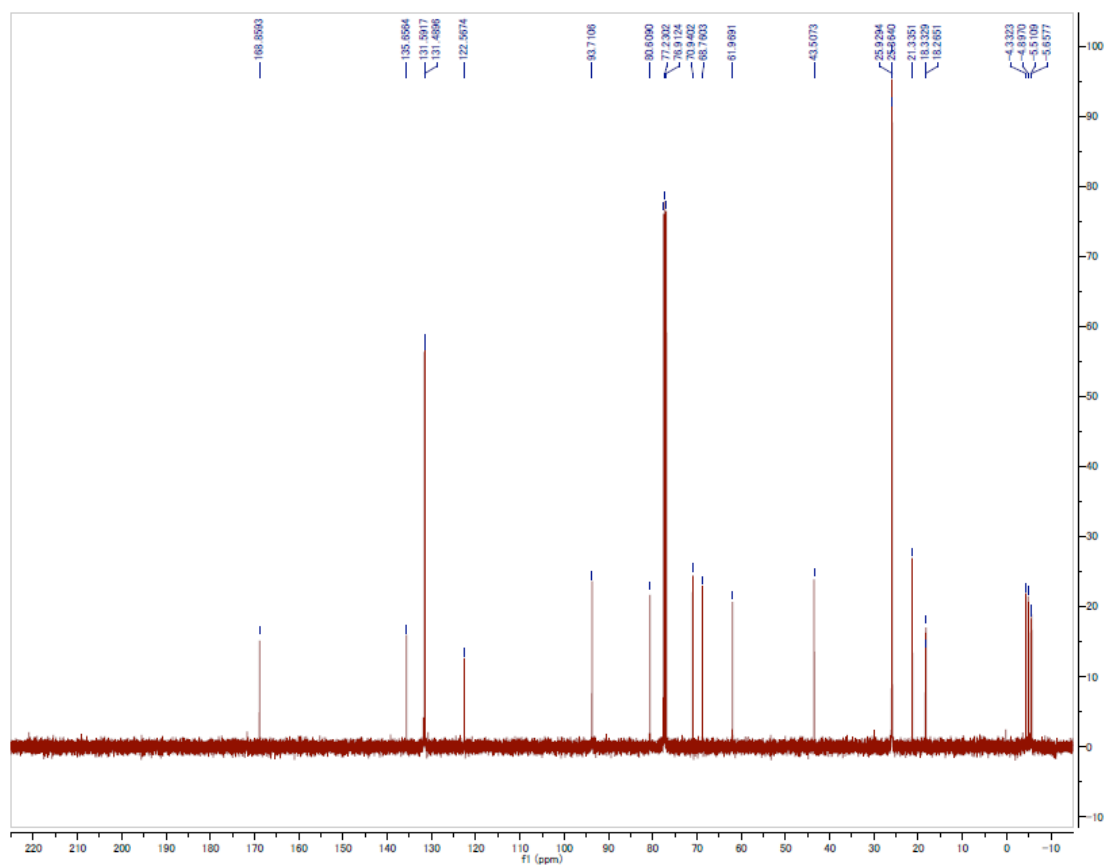

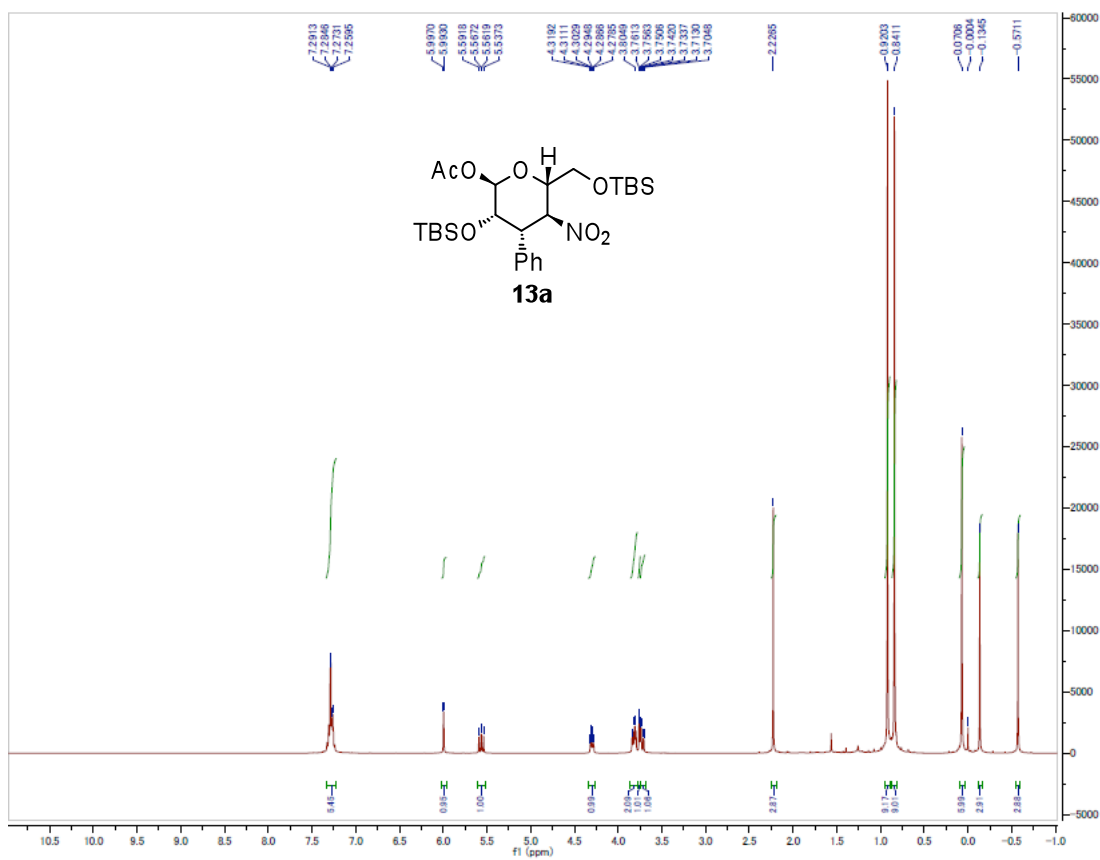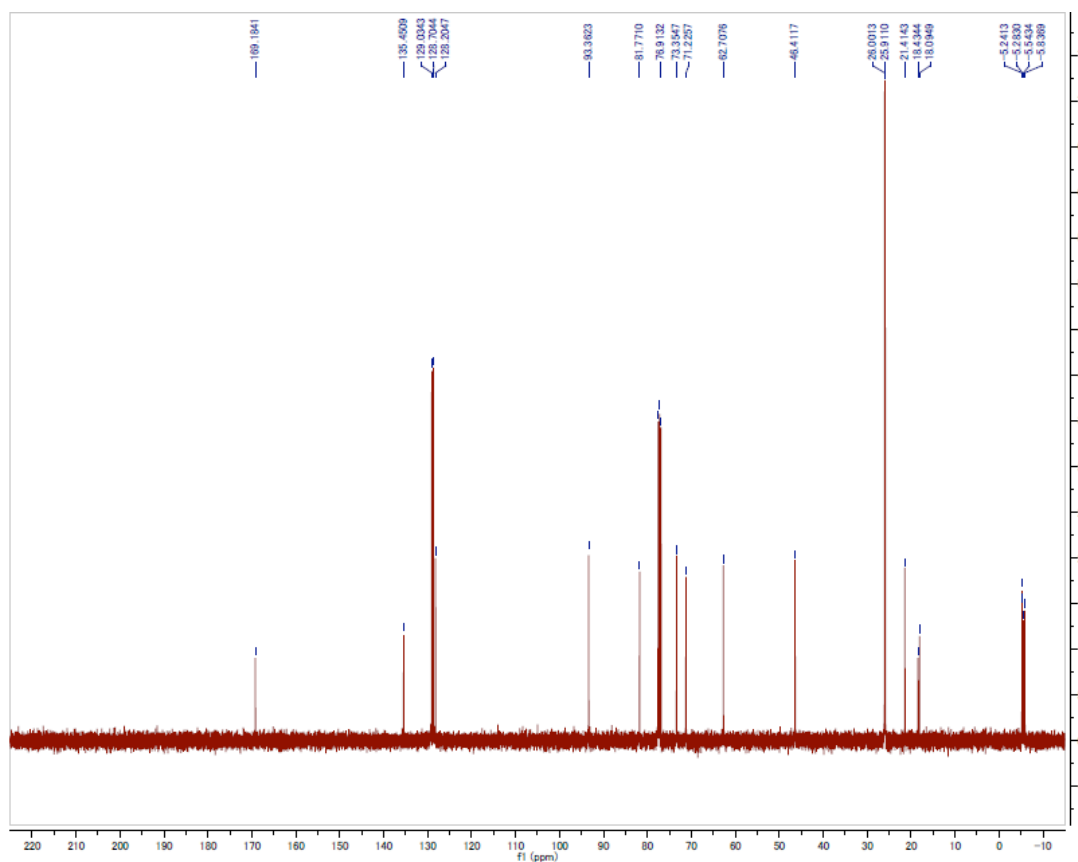

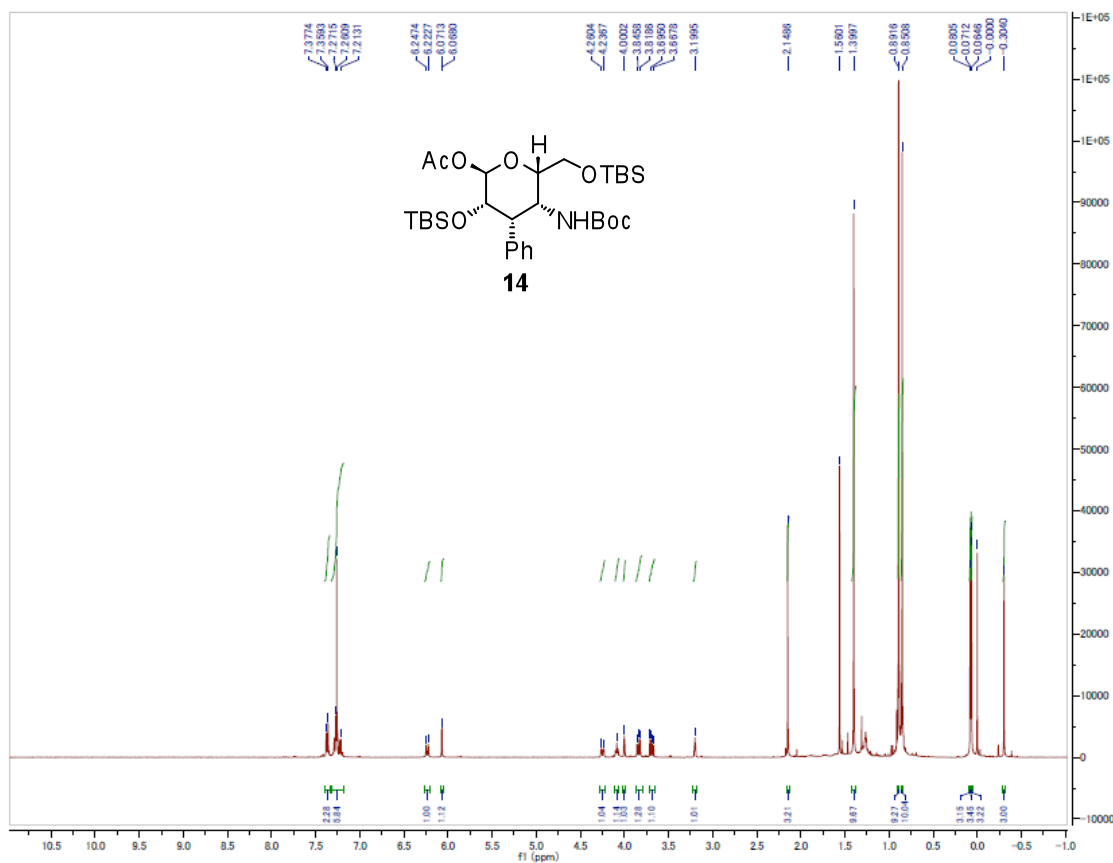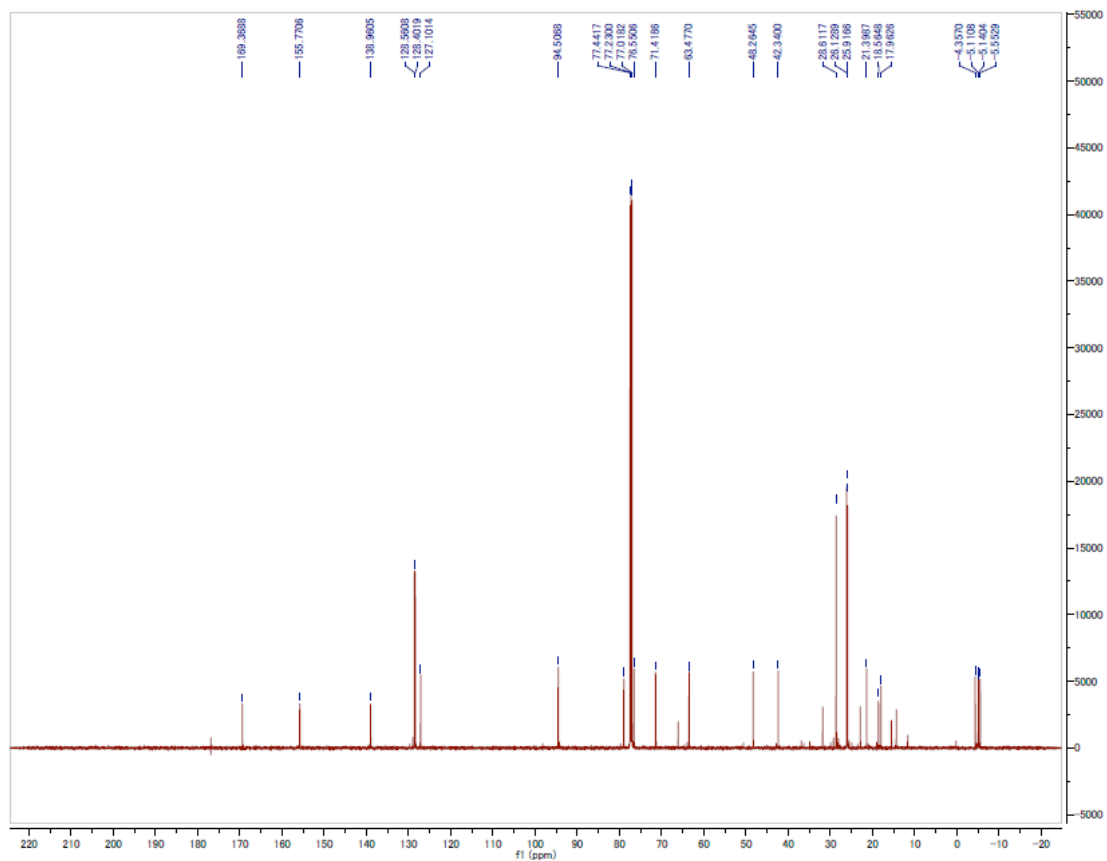

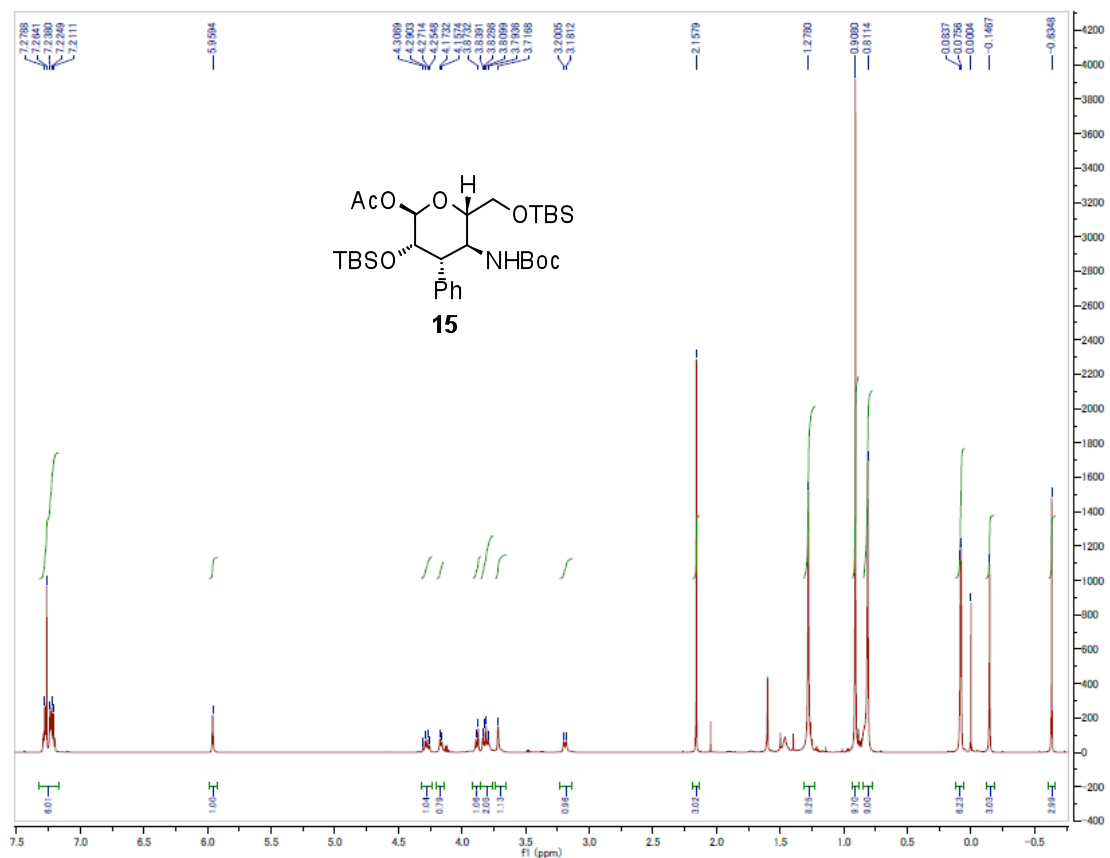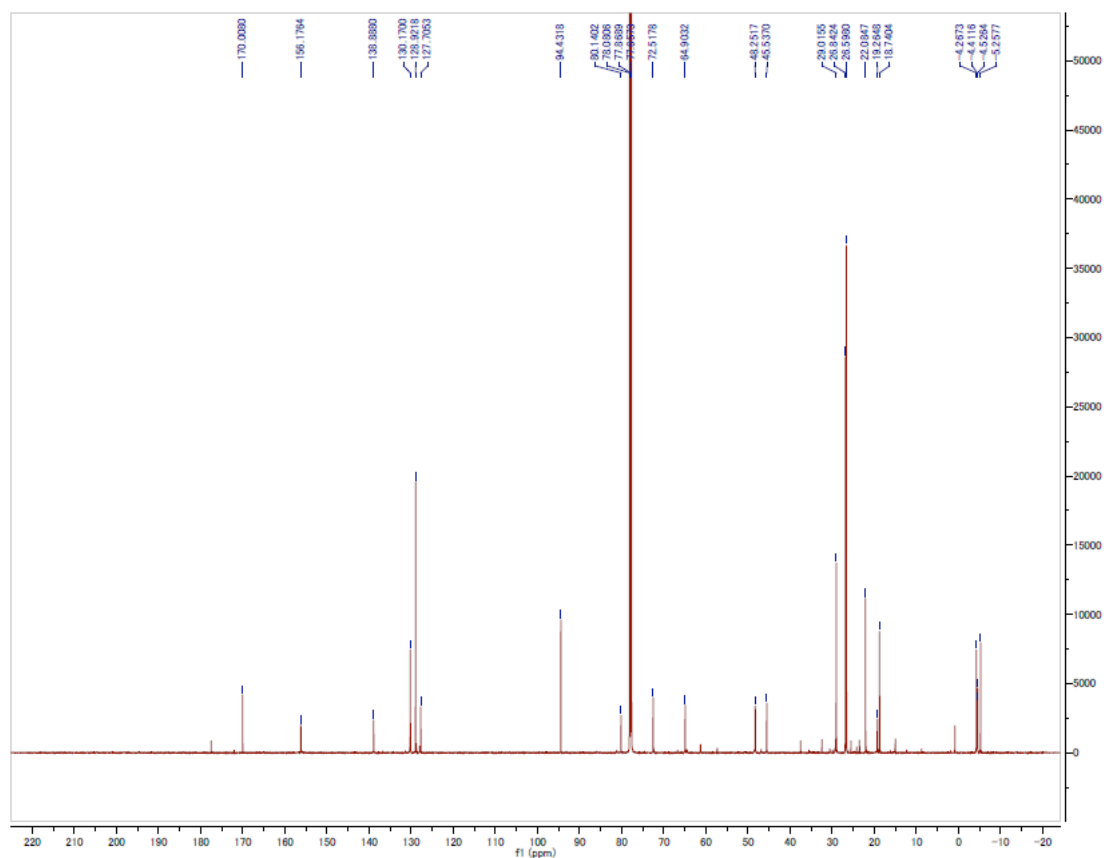

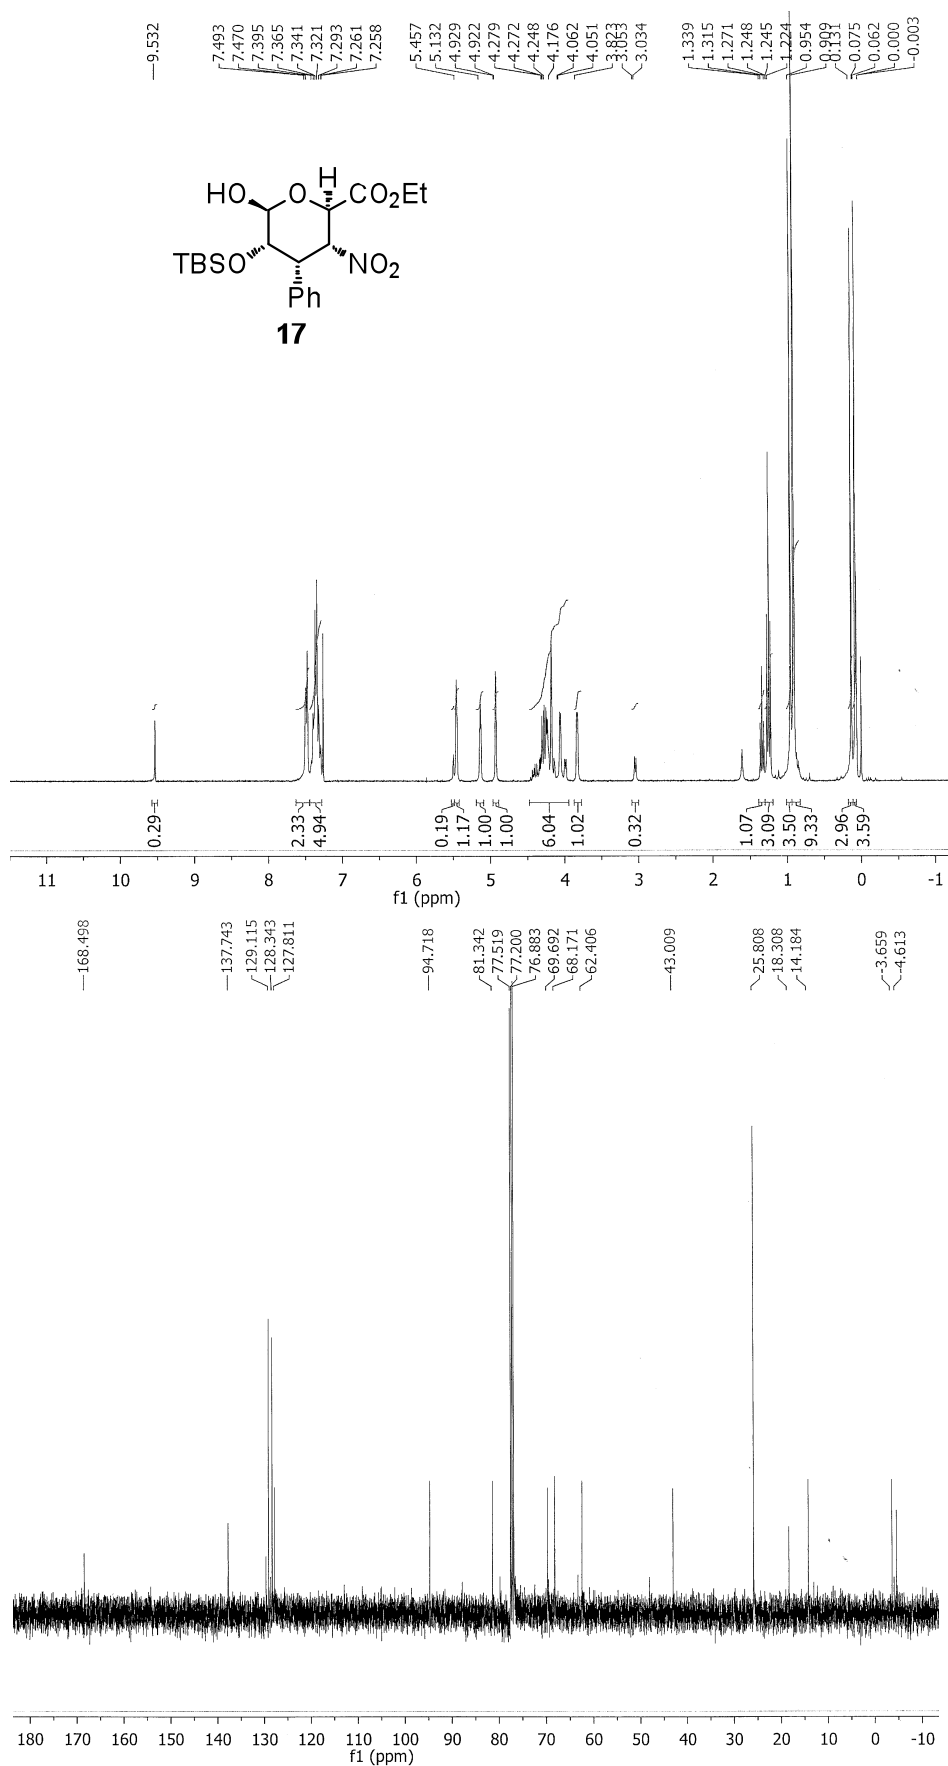

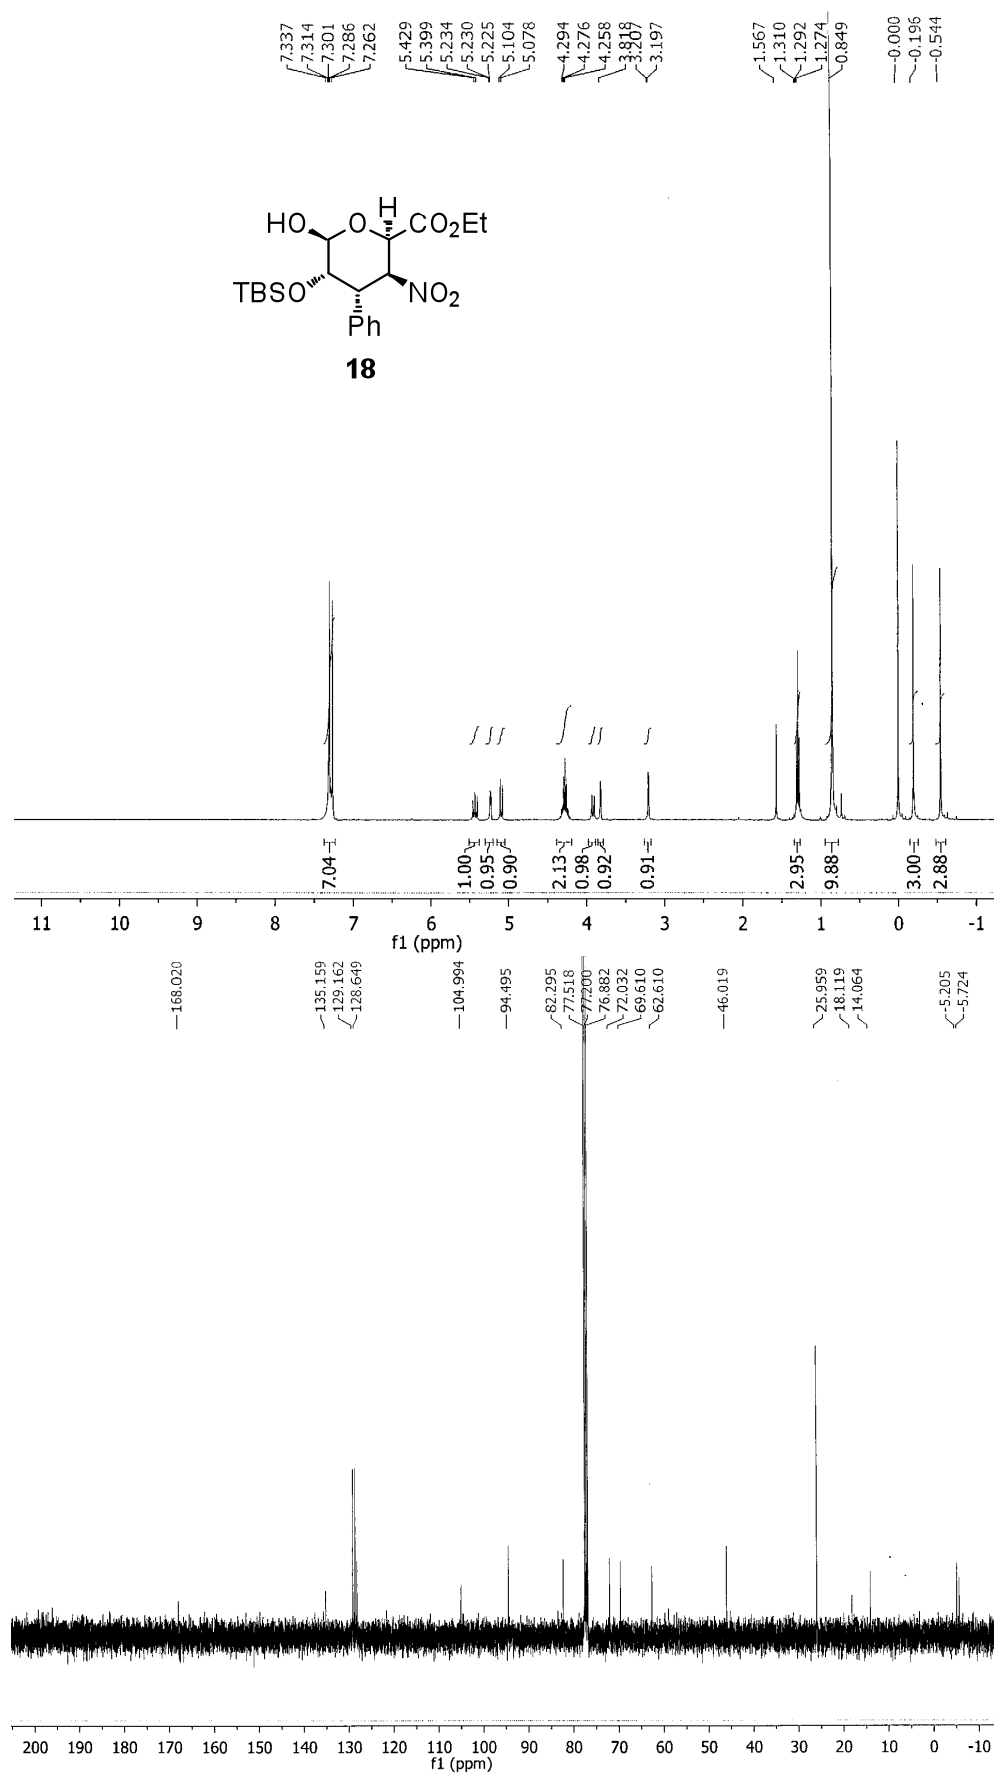

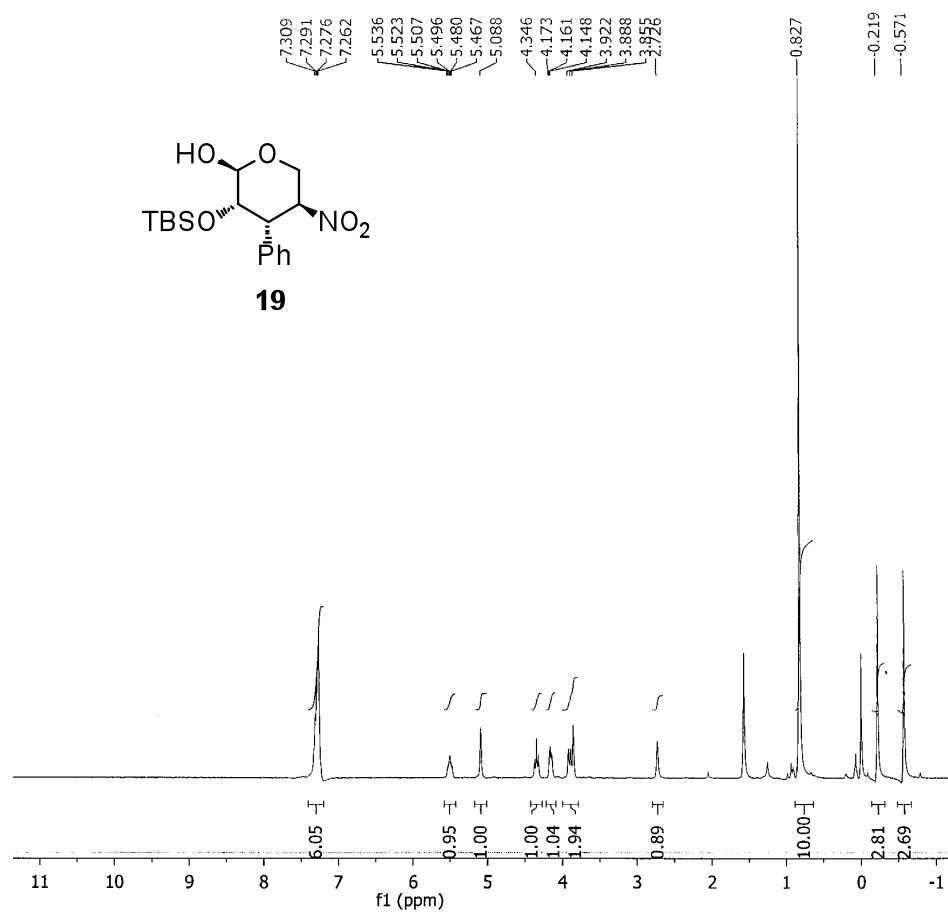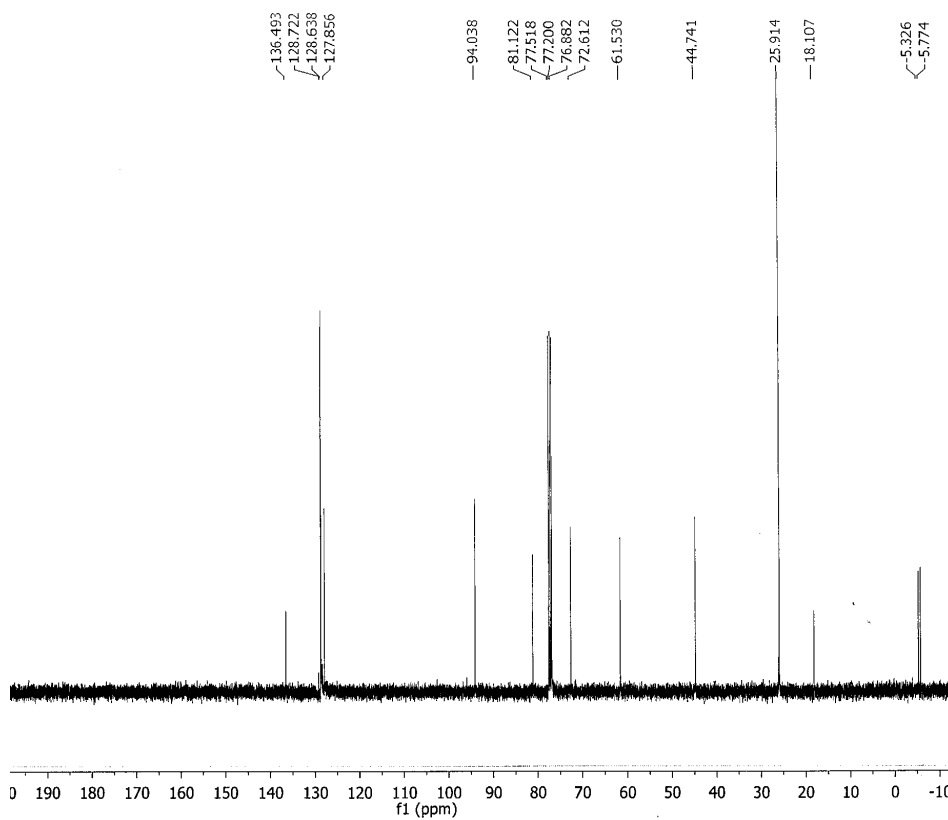

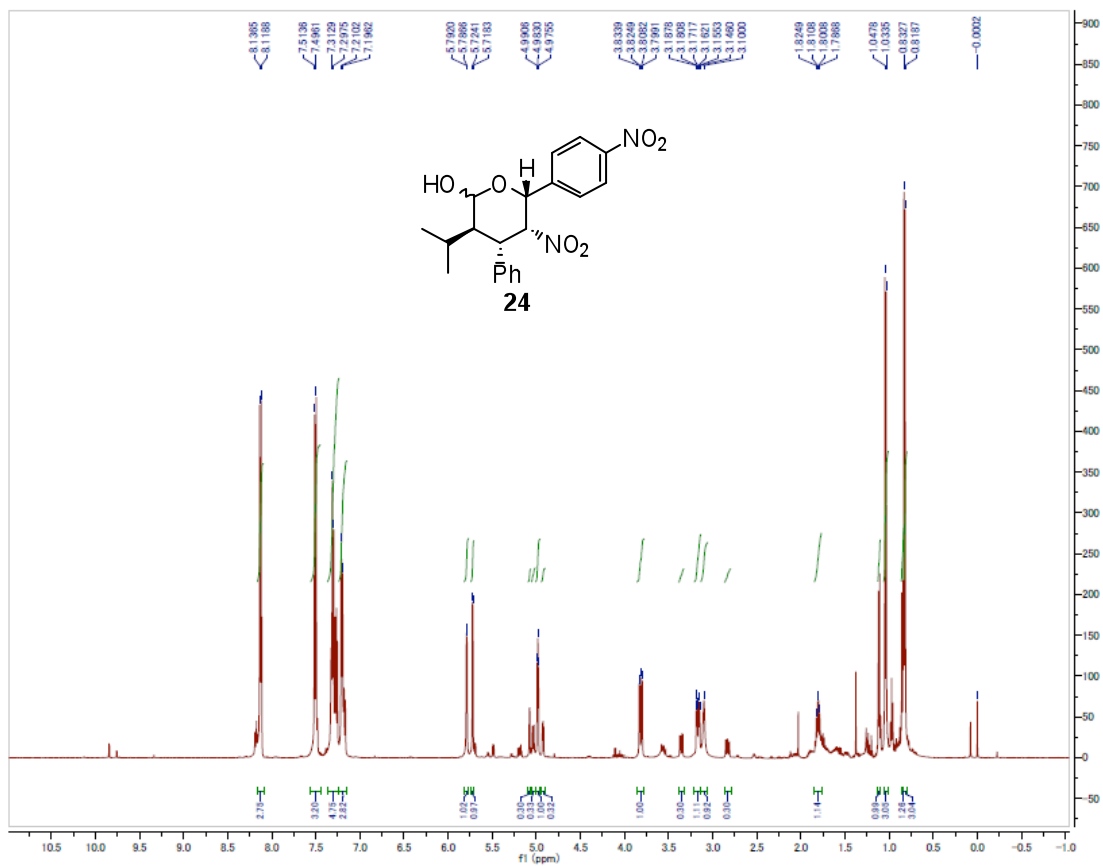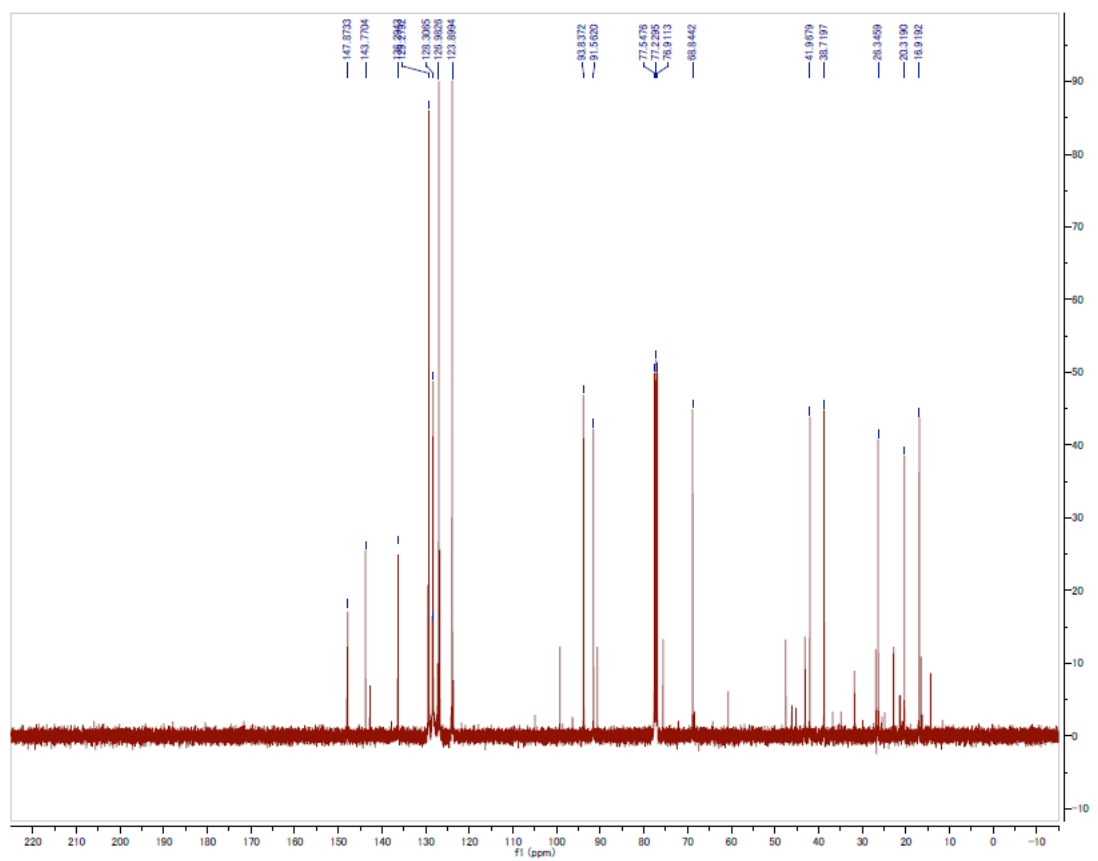



## 7. X-ray crystallographic data of 12b

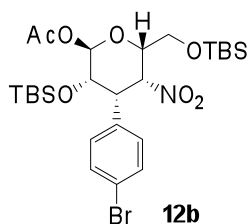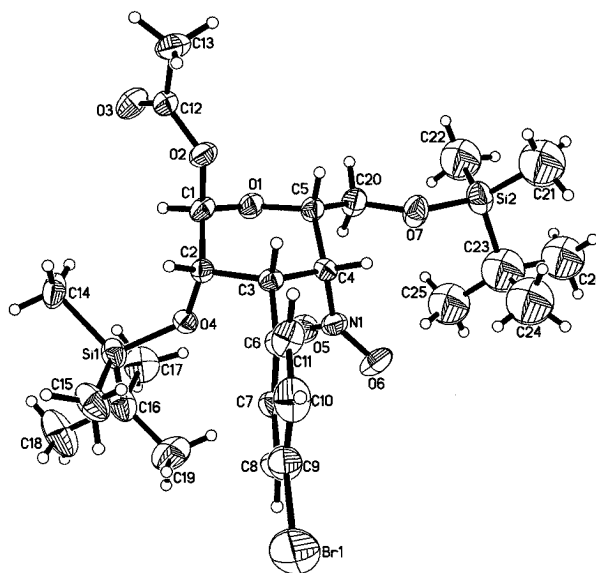**Table S1. Crystal data and structure refinement for 12b.**

|                                 |                                                                     |          |
|---------------------------------|---------------------------------------------------------------------|----------|
| Empirical formula               | C <sub>26</sub> H <sub>44</sub> Br N O <sub>7</sub> Si <sub>2</sub> |          |
| Formula weight                  | 618.71                                                              |          |
| Temperature                     | 296(2) K                                                            |          |
| Wavelength                      | 0.71073 Å                                                           |          |
| Crystal system                  | Orthorhombic                                                        |          |
| Space group                     | P2(1)2(1)2(1)                                                       |          |
| Unit cell dimensions            | a = 7.3567(15) Å                                                    | α = 90°. |
|                                 | b = 18.732(4) Å                                                     | β = 90°. |
|                                 | c = 24.448(5) Å                                                     | γ = 90°. |
| Volume                          | 3369.1(12) Å <sup>3</sup>                                           |          |
| Z                               | 4                                                                   |          |
| Density (calculated)            | 1.220 Mg/m <sup>3</sup>                                             |          |
| Absorption coefficient          | 1.329 mm <sup>-1</sup>                                              |          |
| F(000)                          | 1304                                                                |          |
| Crystal size                    | 0.27 x 0.22 x 0.18 mm <sup>3</sup>                                  |          |
| Theta range for data collection | 1.37 to 24.99°.                                                     |          |
| Index ranges                    | -8 ≤ h ≤ 8, -22 ≤ k ≤ 20, -29 ≤ l ≤ 29                              |          |
| Reflections collected           | 24869                                                               |          |
| Independent reflections         | 5931 [R(int) = 0.0356]                                              |          |
| Completeness to theta = 24.99°  | 100.0 %                                                             |          |
| Absorption correction           | Semi-empirical from equivalents                                     |          |

|                                   |                                             |
|-----------------------------------|---------------------------------------------|
| Max. and min. transmission        | 0.7959 and 0.7155                           |
| Refinement method                 | Full-matrix least-squares on F <sup>2</sup> |
| Data / restraints / parameters    | 5931 / 0 / 325                              |
| Goodness-of-fit on F <sup>2</sup> | 1.068                                       |
| Final R indices [I>2sigma(I)]     | R1 = 0.0823, wR2 = 0.2324                   |
| R indices (all data)              | R1 = 0.1183, wR2 = 0.2637                   |
| Absolute structure parameter      | 0.05(2)                                     |
| Largest diff. peak and hole       | 0.915 and -0.538 e.Å <sup>-3</sup>          |

**Table S2. Atomic coordinates (x 10<sup>4</sup>) and equivalent isotropic displacement parameters (Å<sup>2</sup>x 10<sup>3</sup>) for 12b. U(eq) is defined as one third of the trace of the orthogonalized U<sup>ij</sup> tensor.**

|        | x        | y        | z       | U(eq)  |
|--------|----------|----------|---------|--------|
| Br(1)  | 1716(4)  | 10824(1) | 8897(1) | 232(1) |
| Si(1)  | 4727(2)  | 7623(1)  | 7579(1) | 83(1)  |
| Si(2)  | 6760(16) | 10593(4) | 4871(3) | 110(3) |
| Si(2') | 7790(30) | 10401(7) | 5092(7) | 111(7) |
| O(1)   | 4558(6)  | 8371(2)  | 5890(2) | 75(1)  |
| O(2)   | 1482(6)  | 8093(2)  | 5984(2) | 79(1)  |
| O(3)   | 1766(8)  | 6980(3)  | 5668(2) | 106(2) |
| O(4)   | 4637(5)  | 8251(2)  | 7109(2) | 67(1)  |
| O(5)   | 7222(7)  | 9213(3)  | 6546(2) | 96(1)  |
| O(6)   | 6368(8)  | 10281(3) | 6730(2) | 109(2) |
| O(7)   | 5769(8)  | 10058(3) | 5321(2) | 101(2) |
| N(1)   | 6071(9)  | 9680(3)  | 6547(2) | 77(2)  |
| C(1)   | 3299(8)  | 8059(3)  | 6225(3) | 70(2)  |
| C(2)   | 3110(8)  | 8417(3)  | 6792(2) | 61(1)  |
| C(3)   | 2866(7)  | 9231(3)  | 6718(2) | 57(1)  |
| C(4)   | 4264(8)  | 9557(3)  | 6306(2) | 66(2)  |
| C(5)   | 4313(9)  | 9106(3)  | 5788(2) | 68(2)  |
| C(6)   | 2637(8)  | 9625(3)  | 7255(2) | 63(1)  |
| C(7)   | 4007(11) | 9689(4)  | 7628(3) | 84(2)  |
| C(8)   | 3784(17) | 10044(4) | 8121(3) | 115(3) |
| C(9)   | 2100(20) | 10317(5) | 8234(4) | 118(3) |
| C(10)  | 702(15)  | 10292(5) | 7871(5) | 122(3) |
| C(11)  | 1007(10) | 9940(4)  | 7376(4) | 93(2)  |
| C(12)  | 940(10)  | 7508(4)  | 5707(2) | 75(2)  |
| C(13)  | -903(11) | 7642(5)  | 5461(4) | 103(2) |

|       |          |           |          |         |
|-------|----------|-----------|----------|---------|
| C(14) | 3850(12) | 6778(4)   | 7296(5)  | 118(3)  |
| C(15) | 3334(12) | 7894(6)   | 8173(4)  | 126(3)  |
| C(16) | 7201(10) | 7575(5)   | 7755(4)  | 103(3)  |
| C(17) | 8260(11) | 7393(6)   | 7247(4)  | 127(3)  |
| C(18) | 7484(15) | 6969(8)   | 8178(6)  | 180(6)  |
| C(19) | 7807(15) | 8289(6)   | 7982(6)  | 155(5)  |
| C(20) | 5830(12) | 9317(4)   | 5395(3)  | 89(2)   |
| C(21) | 5470(30) | 11248(11) | 4568(9)  | 245(9)  |
| C(22) | 8050(20) | 10044(10) | 4349(8)  | 214(7)  |
| C(23) | 8680(30) | 11011(14) | 5235(9)  | 235(8)  |
| C(24) | 7400(30) | 11566(12) | 5617(11) | 268(10) |
| C(25) | 9800(30) | 10438(10) | 5572(9)  | 217(7)  |
| C(26) | 9630(30) | 11550(12) | 4806(8)  | 241(9)  |

---

**Table S3. Bond lengths [Å] and angles [°] for 12b.**

|             |           |
|-------------|-----------|
| Br(1)-C(9)  | 1.899(8)  |
| Si(1)-O(4)  | 1.645(4)  |
| Si(1)-C(14) | 1.843(9)  |
| Si(1)-C(15) | 1.848(10) |
| Si(1)-C(16) | 1.873(8)  |
| Si(2)-O(7)  | 1.658(7)  |
| Si(2)-C(21) | 1.72(3)   |
| Si(2)-C(23) | 1.85(3)   |
| Si(2)-C(22) | 1.891(19) |
| O(1)-C(1)   | 1.368(8)  |
| O(1)-C(5)   | 1.410(7)  |
| O(2)-C(12)  | 1.349(8)  |
| O(2)-C(1)   | 1.462(7)  |
| O(3)-C(12)  | 1.164(8)  |
| O(4)-C(2)   | 1.400(7)  |
| O(5)-N(1)   | 1.218(7)  |
| O(6)-N(1)   | 1.230(7)  |
| O(7)-C(20)  | 1.399(9)  |
| N(1)-C(4)   | 1.473(8)  |
| C(1)-C(2)   | 1.546(8)  |
| C(2)-C(3)   | 1.547(8)  |
| C(3)-C(6)   | 1.516(8)  |

|             |           |
|-------------|-----------|
| C(3)-C(4)   | 1.563(8)  |
| C(4)-C(5)   | 1.523(8)  |
| C(5)-C(20)  | 1.525(9)  |
| C(6)-C(7)   | 1.364(9)  |
| C(6)-C(11)  | 1.369(9)  |
| C(7)-C(8)   | 1.386(10) |
| C(8)-C(9)   | 1.368(15) |
| C(9)-C(10)  | 1.360(15) |
| C(10)-C(11) | 1.397(13) |
| C(12)-C(13) | 1.504(11) |
| C(16)-C(19) | 1.514(14) |
| C(16)-C(17) | 1.505(13) |
| C(16)-C(18) | 1.550(12) |
| C(23)-C(25) | 1.58(3)   |
| C(23)-C(26) | 1.61(3)   |
| C(23)-C(24) | 1.69(3)   |

|                   |           |
|-------------------|-----------|
| O(4)-Si(1)-C(14)  | 109.7(3)  |
| O(4)-Si(1)-C(15)  | 109.3(4)  |
| C(14)-Si(1)-C(15) | 109.7(5)  |
| O(4)-Si(1)-C(16)  | 103.5(3)  |
| C(14)-Si(1)-C(16) | 112.7(4)  |
| C(15)-Si(1)-C(16) | 111.8(5)  |
| O(7)-Si(2)-C(21)  | 118.2(10) |
| O(7)-Si(2)-C(23)  | 105.9(10) |
| C(21)-Si(2)-C(23) | 109.2(11) |
| O(7)-Si(2)-C(22)  | 109.8(8)  |
| C(21)-Si(2)-C(22) | 112.0(11) |
| C(23)-Si(2)-C(22) | 99.9(11)  |
| C(1)-O(1)-C(5)    | 115.9(5)  |
| C(12)-O(2)-C(1)   | 115.9(5)  |
| C(2)-O(4)-Si(1)   | 125.3(4)  |
| C(20)-O(7)-Si(2)  | 132.1(5)  |
| O(5)-N(1)-O(6)    | 122.3(6)  |
| O(5)-N(1)-C(4)    | 120.9(5)  |
| O(6)-N(1)-C(4)    | 116.7(7)  |
| O(1)-C(1)-O(2)    | 111.0(5)  |
| O(1)-C(1)-C(2)    | 114.4(5)  |
| O(2)-C(1)-C(2)    | 105.0(5)  |

|                   |           |
|-------------------|-----------|
| O(4)-C(2)-C(3)    | 112.2(5)  |
| O(4)-C(2)-C(1)    | 109.1(5)  |
| C(3)-C(2)-C(1)    | 109.5(4)  |
| C(6)-C(3)-C(2)    | 113.0(4)  |
| C(6)-C(3)-C(4)    | 116.2(5)  |
| C(2)-C(3)-C(4)    | 112.6(5)  |
| N(1)-C(4)-C(5)    | 113.5(5)  |
| N(1)-C(4)-C(3)    | 113.4(4)  |
| C(5)-C(4)-C(3)    | 109.5(5)  |
| O(1)-C(5)-C(4)    | 113.5(5)  |
| O(1)-C(5)-C(20)   | 105.7(5)  |
| C(4)-C(5)-C(20)   | 113.4(5)  |
| C(7)-C(6)-C(11)   | 117.7(6)  |
| C(7)-C(6)-C(3)    | 122.7(5)  |
| C(11)-C(6)-C(3)   | 119.6(6)  |
| C(6)-C(7)-C(8)    | 122.4(8)  |
| C(9)-C(8)-C(7)    | 117.5(9)  |
| C(10)-C(9)-C(8)   | 122.7(7)  |
| C(10)-C(9)-Br(1)  | 117.4(9)  |
| C(8)-C(9)-Br(1)   | 119.6(9)  |
| C(9)-C(10)-C(11)  | 117.4(8)  |
| C(6)-C(11)-C(10)  | 122.0(9)  |
| O(3)-C(12)-O(2)   | 125.2(6)  |
| O(3)-C(12)-C(13)  | 125.4(7)  |
| O(2)-C(12)-C(13)  | 109.4(6)  |
| C(19)-C(16)-C(17) | 110.5(9)  |
| C(19)-C(16)-C(18) | 111.3(10) |
| C(17)-C(16)-C(18) | 108.4(9)  |
| C(19)-C(16)-Si(1) | 109.2(6)  |
| C(17)-C(16)-Si(1) | 108.9(6)  |
| C(18)-C(16)-Si(1) | 108.6(6)  |
| O(7)-C(20)-C(5)   | 108.4(6)  |
| C(25)-C(23)-C(26) | 122.5(18) |
| C(25)-C(23)-C(24) | 115.0(18) |
| C(26)-C(23)-C(24) | 102.4(19) |
| C(25)-C(23)-Si(2) | 111.2(17) |
| C(26)-C(23)-Si(2) | 106.4(14) |
| C(24)-C(23)-Si(2) | 95.7(14)  |

---

Symmetry transformations used to generate equivalent atoms:

**Table S4. Anisotropic displacement parameters ( $\text{\AA}^2 \times 10^3$ ) for 12b. The anisotropic displacement factor exponent takes the form:  $-2\pi^2 [h^2 a^{*2} U^{11} + \dots + 2 h k a^* b^* U^{12}]$** 

|        | $U^{11}$ | $U^{22}$ | $U^{33}$ | $U^{23}$ | $U^{13}$ | $U^{12}$ |
|--------|----------|----------|----------|----------|----------|----------|
| Br(1)  | 410(3)   | 172(1)   | 114(1)   | -57(1)   | 81(1)    | 47(2)    |
| Si(1)  | 70(1)    | 84(1)    | 94(1)    | 25(1)    | -4(1)    | 3(1)     |
| Si(2)  | 129(6)   | 101(3)   | 101(3)   | 25(3)    | 17(4)    | -5(3)    |
| Si(2') | 125(11)  | 96(6)    | 111(9)   | 13(5)    | 40(8)    | -10(6)   |
| O(1)   | 95(3)    | 57(2)    | 73(2)    | -13(2)   | 4(2)     | 0(2)     |
| O(2)   | 84(3)    | 62(2)    | 92(3)    | -14(2)   | -23(2)   | -3(2)    |
| O(3)   | 116(4)   | 73(3)    | 128(4)   | -36(3)   | 0(4)     | -7(3)    |
| O(4)   | 67(2)    | 68(2)    | 65(2)    | 4(2)     | -9(2)    | 4(2)     |
| O(5)   | 81(3)    | 99(4)    | 108(4)   | 2(3)     | -10(3)   | -1(3)    |
| O(6)   | 116(4)   | 93(3)    | 117(4)   | -39(3)   | -2(3)    | -34(3)   |
| O(7)   | 137(4)   | 78(3)    | 89(3)    | -3(2)    | 36(3)    | -16(3)   |
| N(1)   | 88(4)    | 82(4)    | 60(3)    | -8(3)    | 0(3)     | -23(3)   |
| C(1)   | 70(4)    | 55(3)    | 84(4)    | -13(3)   | -6(3)    | -2(3)    |
| C(2)   | 62(3)    | 57(3)    | 64(3)    | 3(2)     | -4(3)    | -1(3)    |
| C(3)   | 49(3)    | 61(3)    | 63(3)    | -3(2)    | -6(2)    | 3(2)     |
| C(4)   | 83(4)    | 63(3)    | 51(3)    | 3(2)     | -4(3)    | -3(3)    |
| C(5)   | 82(4)    | 59(3)    | 61(3)    | -4(3)    | 7(3)     | -4(3)    |
| C(6)   | 74(4)    | 54(3)    | 60(3)    | 4(2)     | -3(3)    | 2(3)     |
| C(7)   | 111(5)   | 78(4)    | 62(3)    | -7(3)    | -2(4)    | 13(4)    |
| C(8)   | 187(10)  | 93(5)    | 65(4)    | -19(4)   | -15(5)   | 30(6)    |
| C(9)   | 190(11)  | 90(5)    | 73(5)    | -16(4)   | 33(6)    | 8(7)     |
| C(10)  | 121(7)   | 112(7)   | 133(8)   | 0(6)     | 55(7)    | 27(6)    |
| C(11)  | 80(4)    | 81(4)    | 117(5)   | -15(4)   | 30(4)    | 10(4)    |
| C(12)  | 92(4)    | 67(4)    | 66(3)    | -1(3)    | -5(3)    | -13(4)   |
| C(13)  | 95(5)    | 105(6)   | 108(5)   | -25(5)   | -31(4)   | -5(4)    |
| C(14)  | 110(6)   | 74(5)    | 169(9)   | 41(5)    | -30(6)   | -20(4)   |
| C(15)  | 94(5)    | 181(9)   | 102(6)   | 49(6)    | 23(5)    | 2(6)     |
| C(16)  | 70(4)    | 113(6)   | 127(6)   | 43(5)    | -8(4)    | 6(4)     |
| C(17)  | 72(4)    | 150(8)   | 161(8)   | 5(7)     | 6(5)     | 23(5)    |
| C(18)  | 109(7)   | 235(14)  | 195(12)  | 123(11)  | -8(7)    | 63(8)    |
| C(19)  | 102(7)   | 139(9)   | 224(13)  | -17(9)   | -83(8)   | -2(6)    |
| C(20)  | 123(6)   | 74(4)    | 71(4)    | -12(3)   | 27(4)    | -11(4)   |

**Table S5. Hydrogen coordinates ( $\times 10^4$ ) and isotropic displacement parameters ( $\text{\AA}^2 \times 10^{-3}$ ) for 12b.**

|        | x     | y     | z    | U(eq) |
|--------|-------|-------|------|-------|
| H(1)   | 3629  | 7557  | 6278 | 84    |
| H(2)   | 2027  | 8225  | 6973 | 73    |
| H(3)   | 1688  | 9281  | 6535 | 69    |
| H(4)   | 3790  | 10026 | 6200 | 79    |
| H(5)   | 3151  | 9167  | 5598 | 81    |
| H(7)   | 5131  | 9487  | 7549 | 101   |
| H(8)   | 4743  | 10094 | 8366 | 138   |
| H(10)  | -415  | 10501 | 7950 | 147   |
| H(11)  | 74    | 9920  | 7119 | 111   |
| H(13A) | -1464 | 7194  | 5371 | 123   |
| H(13B) | -773  | 7923  | 5135 | 123   |
| H(13C) | -1648 | 7893  | 5719 | 123   |
| H(14A) | 4465  | 6673  | 6959 | 141   |
| H(14B) | 2569  | 6822  | 7229 | 141   |
| H(14C) | 4060  | 6399  | 7553 | 141   |
| H(15A) | 2559  | 8283  | 8070 | 151   |
| H(15B) | 4117  | 8040  | 8466 | 151   |
| H(15C) | 2604  | 7498  | 8290 | 151   |
| H(17A) | 7709  | 6991  | 7069 | 153   |
| H(17B) | 9489  | 7278  | 7345 | 153   |
| H(17C) | 8257  | 7795  | 7004 | 153   |
| H(18A) | 8741  | 6951  | 8284 | 216   |
| H(18B) | 7141  | 6521  | 8018 | 216   |
| H(18C) | 6747  | 7058  | 8495 | 216   |
| H(19A) | 7939  | 8624  | 7688 | 186   |
| H(19B) | 8951  | 8233  | 8166 | 186   |
| H(19C) | 6915  | 8461  | 8237 | 186   |
| H(20A) | 7000  | 9179  | 5545 | 107   |
| H(20B) | 5669  | 9077  | 5047 | 107   |
| H(21A) | 5483  | 11669 | 4792 | 294   |
| H(21B) | 4237  | 11082 | 4530 | 294   |
| H(21C) | 5954  | 11357 | 4214 | 294   |

|        |       |       |      |     |
|--------|-------|-------|------|-----|
| H(22A) | 7202  | 9766  | 4138 | 257 |
| H(22B) | 8876  | 9731  | 4534 | 257 |
| H(22C) | 8711  | 10356 | 4111 | 257 |
| H(24A) | 8009  | 12016 | 5654 | 322 |
| H(24B) | 7214  | 11360 | 5972 | 322 |
| H(24C) | 6246  | 11637 | 5441 | 322 |
| H(25A) | 10546 | 10676 | 5838 | 261 |
| H(25B) | 10563 | 10170 | 5327 | 261 |
| H(25C) | 8979  | 10120 | 5754 | 261 |
| H(26A) | 10126 | 11283 | 4507 | 289 |
| H(26B) | 10587 | 11808 | 4986 | 289 |
| H(26C) | 8740  | 11881 | 4671 | 289 |

---

**Table S6. Torsion angles [°] for 12b.**

|                        |            |
|------------------------|------------|
| C(14)-Si(1)-O(4)-C(2)  | 50.1(6)    |
| C(15)-Si(1)-O(4)-C(2)  | -70.2(6)   |
| C(16)-Si(1)-O(4)-C(2)  | 170.6(5)   |
| C(21)-Si(2)-O(7)-C(20) | 135.1(11)  |
| C(23)-Si(2)-O(7)-C(20) | -102.1(11) |
| C(22)-Si(2)-O(7)-C(20) | 4.9(14)    |
| C(5)-O(1)-C(1)-O(2)    | 62.6(6)    |
| C(5)-O(1)-C(1)-C(2)    | -56.1(7)   |
| C(12)-O(2)-C(1)-O(1)   | 96.0(6)    |
| C(12)-O(2)-C(1)-C(2)   | -139.8(5)  |
| Si(1)-O(4)-C(2)-C(3)   | 139.3(4)   |
| Si(1)-O(4)-C(2)-C(1)   | -99.2(5)   |
| O(1)-C(1)-C(2)-O(4)    | -73.0(6)   |
| O(2)-C(1)-C(2)-O(4)    | 165.0(4)   |
| O(1)-C(1)-C(2)-C(3)    | 50.1(7)    |
| O(2)-C(1)-C(2)-C(3)    | -71.9(6)   |
| O(4)-C(2)-C(3)-C(6)    | -59.7(6)   |
| C(1)-C(2)-C(3)-C(6)    | 179.0(5)   |
| O(4)-C(2)-C(3)-C(4)    | 74.4(6)    |
| C(1)-C(2)-C(3)-C(4)    | -46.9(6)   |
| O(5)-N(1)-C(4)-C(5)    | -37.7(8)   |
| O(6)-N(1)-C(4)-C(5)    | 139.8(6)   |
| O(5)-N(1)-C(4)-C(3)    | 88.2(7)    |



|                         |           |
|-------------------------|-----------|
| O(6)-N(1)-C(4)-C(3)     | -94.3(6)  |
| C(6)-C(3)-C(4)-N(1)     | 52.7(7)   |
| C(2)-C(3)-C(4)-N(1)     | -79.9(6)  |
| C(6)-C(3)-C(4)-C(5)     | -179.3(5) |
| C(2)-C(3)-C(4)-C(5)     | 48.1(6)   |
| C(1)-O(1)-C(5)-C(4)     | 56.9(7)   |
| C(1)-O(1)-C(5)-C(20)    | -178.2(5) |
| N(1)-C(4)-C(5)-O(1)     | 76.9(6)   |
| C(3)-C(4)-C(5)-O(1)     | -51.0(7)  |
| N(1)-C(4)-C(5)-C(20)    | -43.8(7)  |
| C(3)-C(4)-C(5)-C(20)    | -171.7(5) |
| C(2)-C(3)-C(6)-C(7)     | 68.1(7)   |
| C(4)-C(3)-C(6)-C(7)     | -64.2(7)  |
| C(2)-C(3)-C(6)-C(11)    | -112.8(6) |
| C(4)-C(3)-C(6)-C(11)    | 114.8(6)  |
| C(11)-C(6)-C(7)-C(8)    | 1.5(10)   |
| C(3)-C(6)-C(7)-C(8)     | -179.4(7) |
| C(6)-C(7)-C(8)-C(9)     | 1.9(12)   |
| C(7)-C(8)-C(9)-C(10)    | -4.2(15)  |
| C(7)-C(8)-C(9)-Br(1)    | -178.9(6) |
| C(8)-C(9)-C(10)-C(11)   | 3.0(15)   |
| Br(1)-C(9)-C(10)-C(11)  | 177.8(6)  |
| C(7)-C(6)-C(11)-C(10)   | -2.8(11)  |
| C(3)-C(6)-C(11)-C(10)   | 178.1(7)  |
| C(9)-C(10)-C(11)-C(6)   | 0.6(13)   |
| C(1)-O(2)-C(12)-O(3)    | 3.6(10)   |
| C(1)-O(2)-C(12)-C(13)   | -177.0(6) |
| O(4)-Si(1)-C(16)-C(19)  | 61.4(8)   |
| C(14)-Si(1)-C(16)-C(19) | 179.9(8)  |
| C(15)-Si(1)-C(16)-C(19) | -56.1(9)  |
| O(4)-Si(1)-C(16)-C(17)  | -59.3(7)  |
| C(14)-Si(1)-C(16)-C(17) | 59.2(8)   |
| C(15)-Si(1)-C(16)-C(17) | -176.8(7) |
| O(4)-Si(1)-C(16)-C(18)  | -177.1(8) |
| C(14)-Si(1)-C(16)-C(18) | -58.6(10) |
| C(15)-Si(1)-C(16)-C(18) | 65.4(10)  |
| Si(2)-O(7)-C(20)-C(5)   | -167.1(8) |
| O(1)-C(5)-C(20)-O(7)    | -174.2(6) |
| C(4)-C(5)-C(20)-O(7)    | -49.3(8)  |

|                         |            |
|-------------------------|------------|
| O(7)-Si(2)-C(23)-C(25)  | 45.9(16)   |
| C(21)-Si(2)-C(23)-C(25) | 174.2(15)  |
| C(22)-Si(2)-C(23)-C(25) | -68.2(16)  |
| O(7)-Si(2)-C(23)-C(26)  | -178.5(13) |
| C(21)-Si(2)-C(23)-C(26) | -50.2(17)  |
| C(22)-Si(2)-C(23)-C(26) | 67.5(17)   |
| O(7)-Si(2)-C(23)-C(24)  | -73.7(15)  |
| C(21)-Si(2)-C(23)-C(24) | 54.6(17)   |
| C(22)-Si(2)-C(23)-C(24) | 172.2(14)  |

---

Symmetry transformations used to generate equivalent atoms:
